# Supplementary material for: Quantitative matching of crystal structures to experimental powder diffractograms
Source: Royal Society of Chemistry journal article supplement (doi:10.1039/d3sc00168g), 2023-01-01
Supplement: d3sc00168g2.pdf [file d3sc00168g2.pdf]

# Supplementary information for: Quantitative matching of crystal structures to experimental powder diffractograms

R. Alex Mayo, Katherine M. Marczenko, and Erin R. Johnson

## S1 Experimental

### S1.1 Powder X-ray diffraction

Acetaminophen (Sigma Aldrich), caffeine (Alfa Aesar), 1,4-dicyanobenzene (Sigma Aldrich), D-mannitol (VWR), (+)-progesterone (Sigma Aldrich), uracil (Sigma Aldrich), and urea (Sigma Aldrich) were used as received. If the solid powder appeared to have a notably large crystallite size or shape then crushing with a spatula and/or grinding with mortar and pestle was done prior to analysis. PXRD measurements were performed using a PANalytical Empyrean diffractometer in reflection (Bragg-Brentano) geometry with a Cu  $K\alpha$  radiation source ( $\lambda = 1.54184$  Å), Ni  $K\beta$  filter, and PIXcel1D linear detector. A powdered sample was back-loaded into a sample holder with a 16mm insert, which was mounted on a spinning stage at room temperature.

Powder diffractograms were recorded in the 5 - 50 degrees  $2\theta$  range with either a step size of 0.00328 degrees and exposure time of 180 seconds per step (“moderate quality” 3 hour scan) or a step size of 0.01313 degrees and exposure time of 10 seconds per step (“lower quality” 2 minute scan). Data collection was controlled with the Data Collector software.[1]

## S2 Data

### S2.1 Target structures from the CSD

Target crystal structures were identified in the Cambridge Structural Database (CSD) by refcode. Where more than one entry for a given polymorph was available, the one collected at ambient conditions with the lowest R-value was chosen as the primary target used in comparisons. Structures from low temperature or high pressure data collections were used for comparisons where indicated. As disordered structures are not currently compatible with the VC-PWDF method, any such structures were not included in comparisons or analyses (eg. polymorphs of NIWFEE).

### S2.2 CSP landscapes

Lists of *in silico* generated structures hosted in the CPOSS database were obtained from Dr. Louise Price. Some landscapes have been published (progesterone,[2] uracil,[3] 1,4-dicyanobenzene,[4] caffeine,[5]), while others have thus far remained unpublished (mannitol, urea, acetaminophen). While some differences may exist and reference to the publications (where available) is recommended for these fine details, the general approach followed for the generation of the *in silico* structures obtained from the CPOSS database are:

1. Generation and geometry optimization of various molecular conformers using GAUSSIAN.[6]
2. Calculation of atomic multipoles using distributed multipole analysis of the charge density calculated with GAUSSIAN for each conformer.[7]
3. Hypothetical crystal structure generation, restricted to a chosen set of space groups,  $Z$ ,  $Z'$ , and conformers. Possible programs used for this task include MOLPACK,[8] and CrystalPredictor[9].
4. Geometry minimization and energy evaluation of the generated crystal structure using the atomic multipoles for evaluation of the electrostatic interactions, and the Buckingham potential for dispersion interactions with Williams[10], FIT[11] atom-atom parameters. Possible programs used for this task include DMAREL,[12] or DMACRYS[13] (rigid molecule during minimization), and CrystalOptimizer[14] (flexible molecule during minimization).

The structure-energy landscapes were screened for duplicates with an in-house script that utilizes relative energy, VC-PWDF, and COMPACK (tolerance of  $\pm 30\%$  and  $\pm 30^\circ$  on distances and angles, respectively) to identify structures with  $\Delta E < 2$  kJ/mol, VC-PWDF  $< 0.07$ , and 20/20 matches by COMPACK as duplicates.

Table S1: Summary of the result of duplicate screening on the structure-energy landscapes obtained from the CPOSS database. The number of candidates is the total number of structures received from the CPOSS database, and the unique number is the number of structures remaining after the duplicate screening.

| Compound           | CSD ID | Candidates | Unique |
|--------------------|--------|------------|--------|
| Urea               | UREAXX | 793        | 777    |
| 1,4-Dicyanobenzene | TEPNIT | 144        | 94     |
| Uracil             | URACIL | 217        | 211    |
| Acetaminophen      | HXACAN | 640        | 618    |
| Caffeine           | NIWFEE | 84         | 79     |
| Mannitol           | DMANTL | 619        | 546    |
| Progesterone       | PROGST | 149        | 149    |

## S3 Computational methods

### S3.1 VC-(x)PWDF

Our VC-PWDF method[15], which is implemented within the critic2 program[16], was modified in order to allow target unit cell dimensions ( $a$ ,  $b$ ,  $c$ ,  $\alpha$ ,  $\beta$ ,  $\gamma$ ) and experimental powder diffractograms as a txt file (angle  $2\theta$  in degrees, and intensity) to be input for comparison against a simulated powder diffractogram generated by a crystal structure file (cif, res, etc...). We differentiate the results from the comparison of experimental and simulated diffractograms by including “x” before the PWDF portion of the method abbreviation, as in VC-xPWDF. Only diffractograms collected with Cu  $K\alpha$  X-rays are compatible at this time. The VC-PWDF method uses the unit cell dimensions of the target structure (here, the indexed cell dimensions from the experimental powder diffractogram) and searches over all possible unit cell descriptions of the candidate structure for that which best matches the target diffractogram after replacing the unit cell parameters of the candidate unit cell with those of the target structure. The Figure of Merit (FoM) used is the dissimilarity value (POWDIFF) yielded by the triangle-weighted cross-correlation function described by de Gelder *et al.*[17]

## S3.2 autoFIDEL

A Python script written by Jonas Nyman to perform a variation of the FIDEL (Fit with DEviating Lattice parameters) protocol [18] was used. The FIDEL method uses a hill climber’s (steepest descent) algorithm to minimize the difference between two powder diffractograms by variation of the unit cell parameters and atomic positions of the crystal structure that is used to generate the simulated powder diffractogram. The script used in this work only modifies the lattice parameters, no changes to atomic positions are affected during the optimization. The FoM output from autoFIDEL is the similarity value yielded by the triangle-weighted cross-correlation function described by de Gelder *et al.*[17] In order to ease the comparison between FoM values, we have converted the similarity value to the dissimilarity (POWDIFF) by subtraction from one, since this is our preferred metric. Unless otherwise noted, the default parameters of autoFIDEL were used.

## S4 Results

Table S2: Summary of indexed unit cell dimensions from the collected powder diffractograms and comparison to the unit cell dimensions of the matching polymorph in the CSD after conversion to their Niggli reduced unit cell. No space group determination was done for the experimental powder data.

| Compound                 | Space group    | $a$ (Å) | $b$ (Å) | $c$ (Å) | $\alpha$ (°) | $\beta$ (°) | $\gamma$ (°) | $V$ (Å <sup>3</sup> ) |
|--------------------------|----------------|---------|---------|---------|--------------|-------------|--------------|-----------------------|
| UREAXX23(RT)             | $P\bar{4}2_1m$ | 4.7042  | 5.6577  | 5.6577  | 90           | 90          | 90           | 150.579               |
| Urea(PXRD)               | -              | 7.987   | 7.987   | 9.4042  | 90           | 90          | 90           | 599.913               |
| TEPNIT04(RT)             | $P\bar{1}$     | 3.847   | 6.585   | 7.322   | 114.5        | 93.6        | 96.9         | 166.254               |
| 1,4-Dicyanobenzene(PXRD) | -              | 3.8514  | 6.5958  | 7.328   | 114.567      | 93.593      | 96.934       | 166.745               |
| URACIL(RT)               | $P2_1/b$       | 3.6552  | 10.3113 | 12.376  | 90           | 90          | 96.570       | 463.386               |
| Uracil(PXRD)             | -              | 3.6691  | 10.3146 | 12.3958 | 90           | 90          | 96.637       | 465.972               |
| HXACAN35(RT)             | $P2_1/n$       | 7.0661  | 9.3366  | 11.6508 | 90           | 97.410      | 90           | 762.223               |
| Acetaminophen(PXRD)      | -              | 7.1078  | 9.3986  | 11.7462 | 90           | 97.541      | 90           | 777.901               |
| NIWFEE03(RT)             | $Cc$           | 6.9531  | 15.0676 | 22.800  | 109.295      | 98.516      | 90           | 2226.607              |
| Caffeine(PXRD)           | -              | 6.9572  | 15.0839 | 22.8451 | 109.277      | 98.758      | 90           | 2233.362              |
| DMANTL07(RT)             | $P2_12_12_1$   | 5.549   | 8.694   | 16.902  | 90           | 90          | 90           | 815.403               |
| D-Mannitol(PXRD)         | -              | 5.5642  | 8.6848  | 16.9008 | 90           | 90          | 90           | 816.711               |
| PROGST10(RT)             | $P2_12_12_1$   | 10.340  | 12.559  | 13.798  | 90           | 90          | 90           | 1791.81               |
| (+)-Progesterone(PXRD)   | -              | 10.3741 | 12.6059 | 13.8464 | 90           | 90.268      | 90           | 1810.74               |

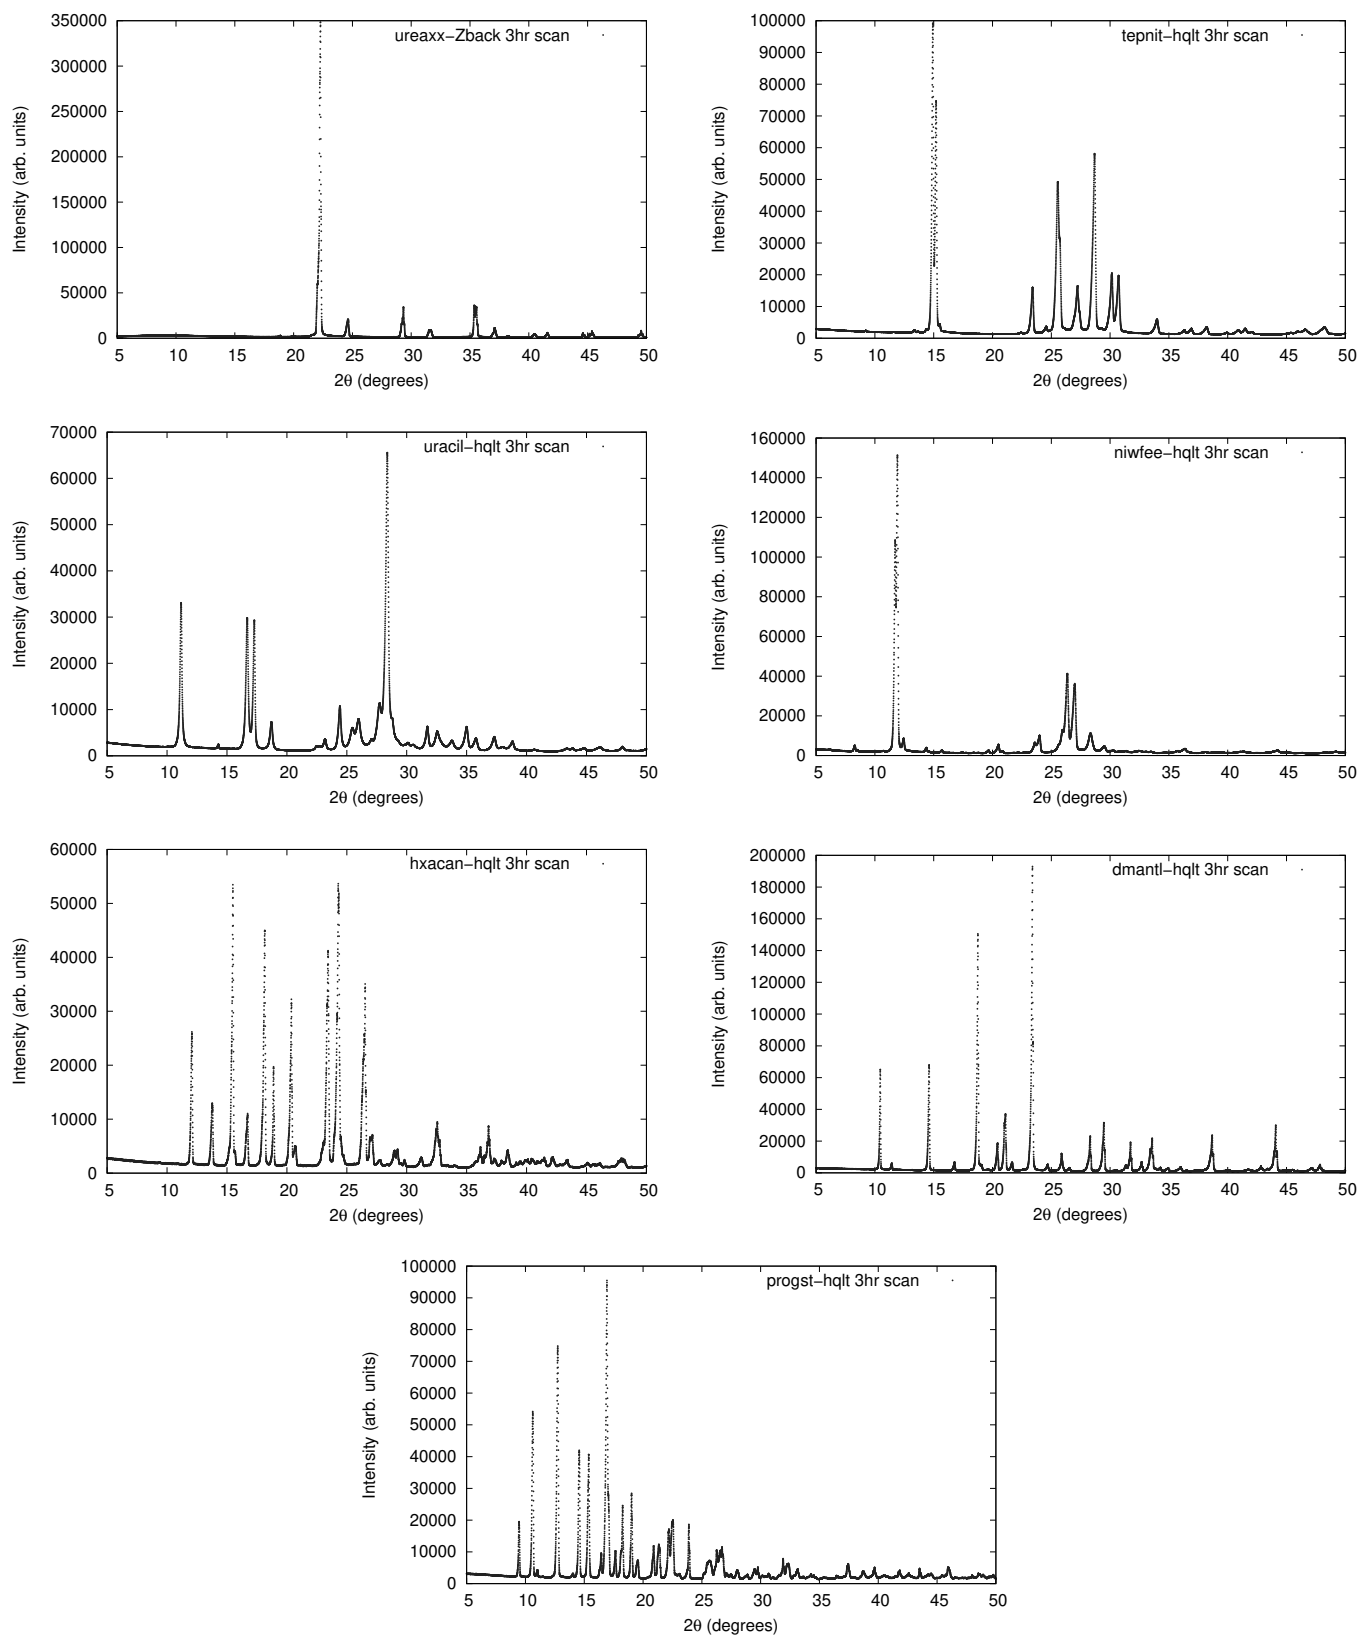

Figure S1: Experimental powder diffractograms collecting with the 3hr scan conditions.

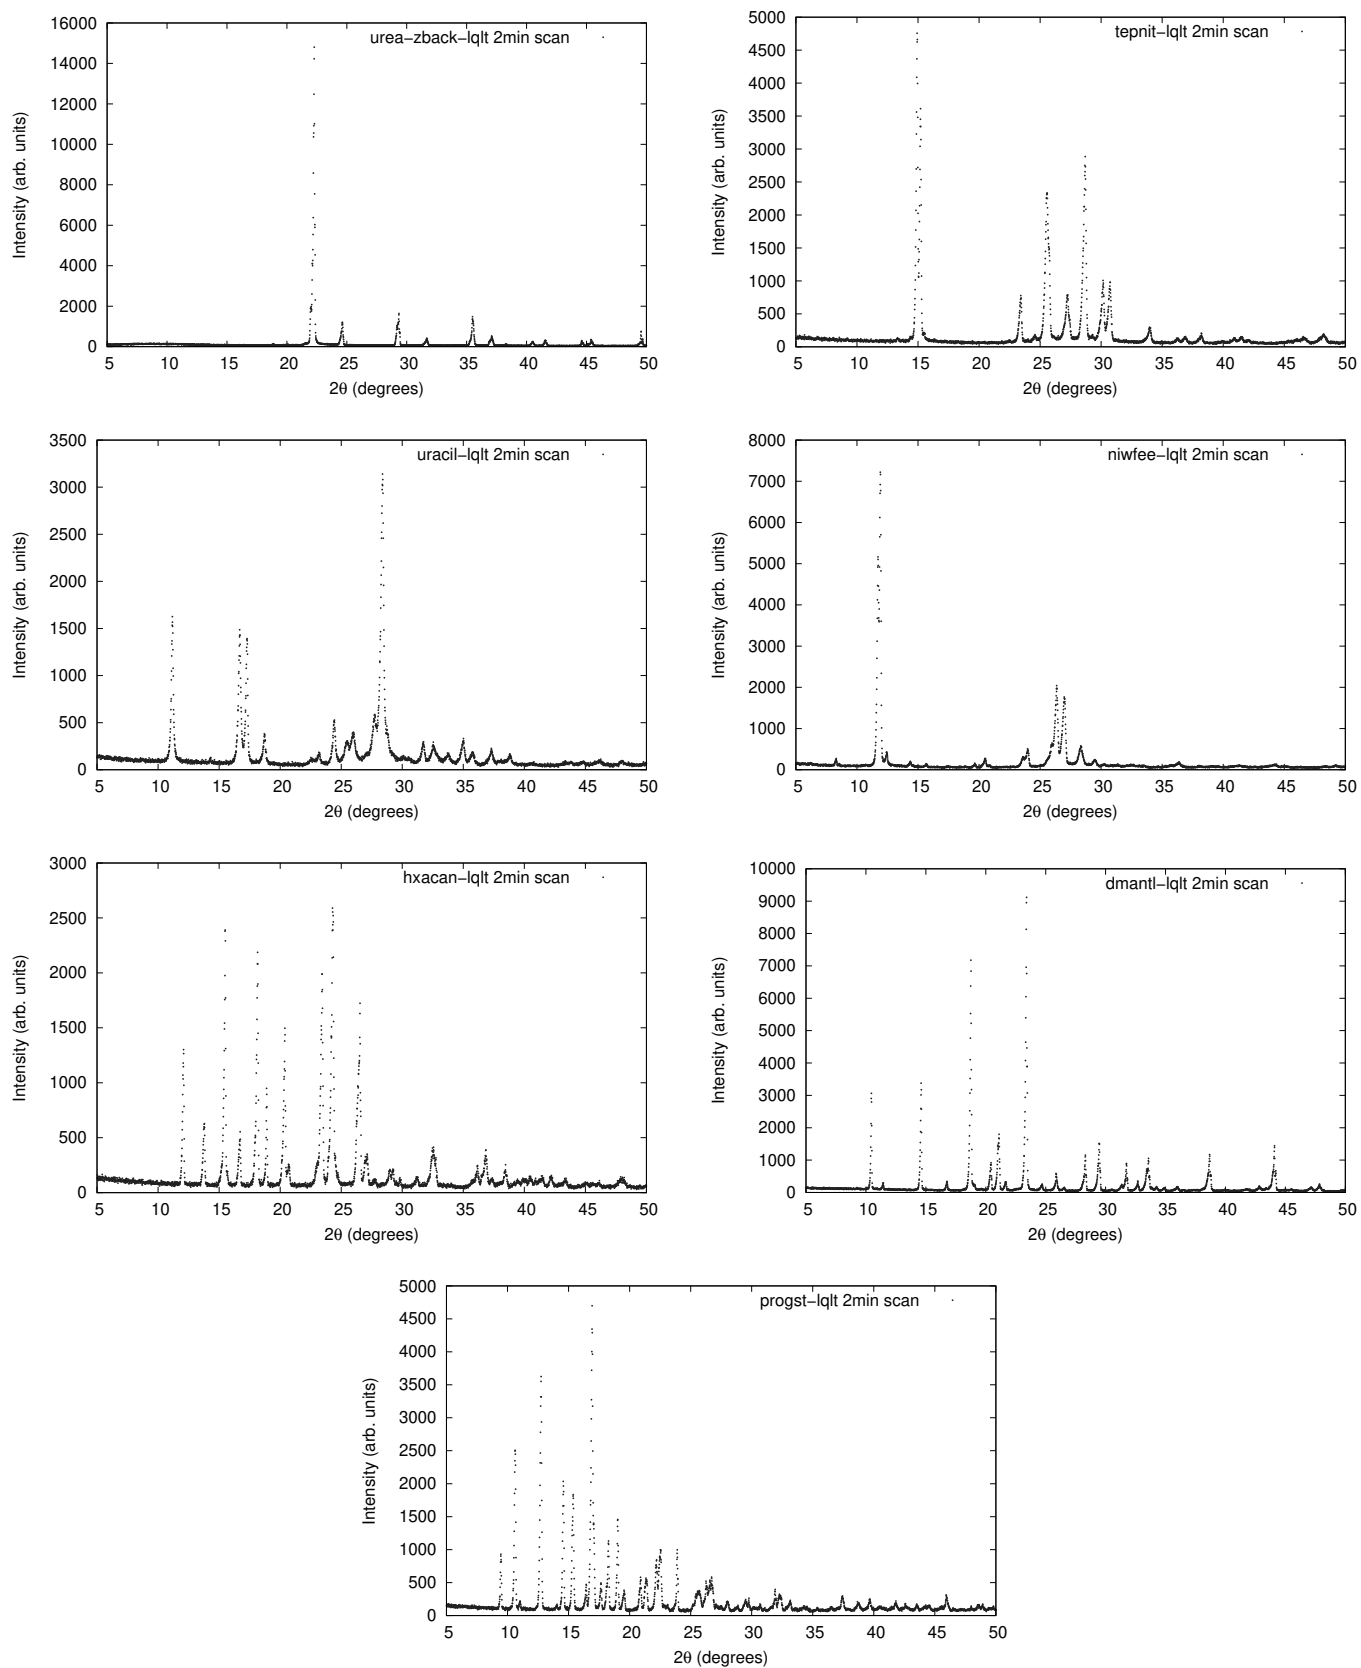

Figure S2: Experimental powder diffractograms collecting with the 2min scan conditions.

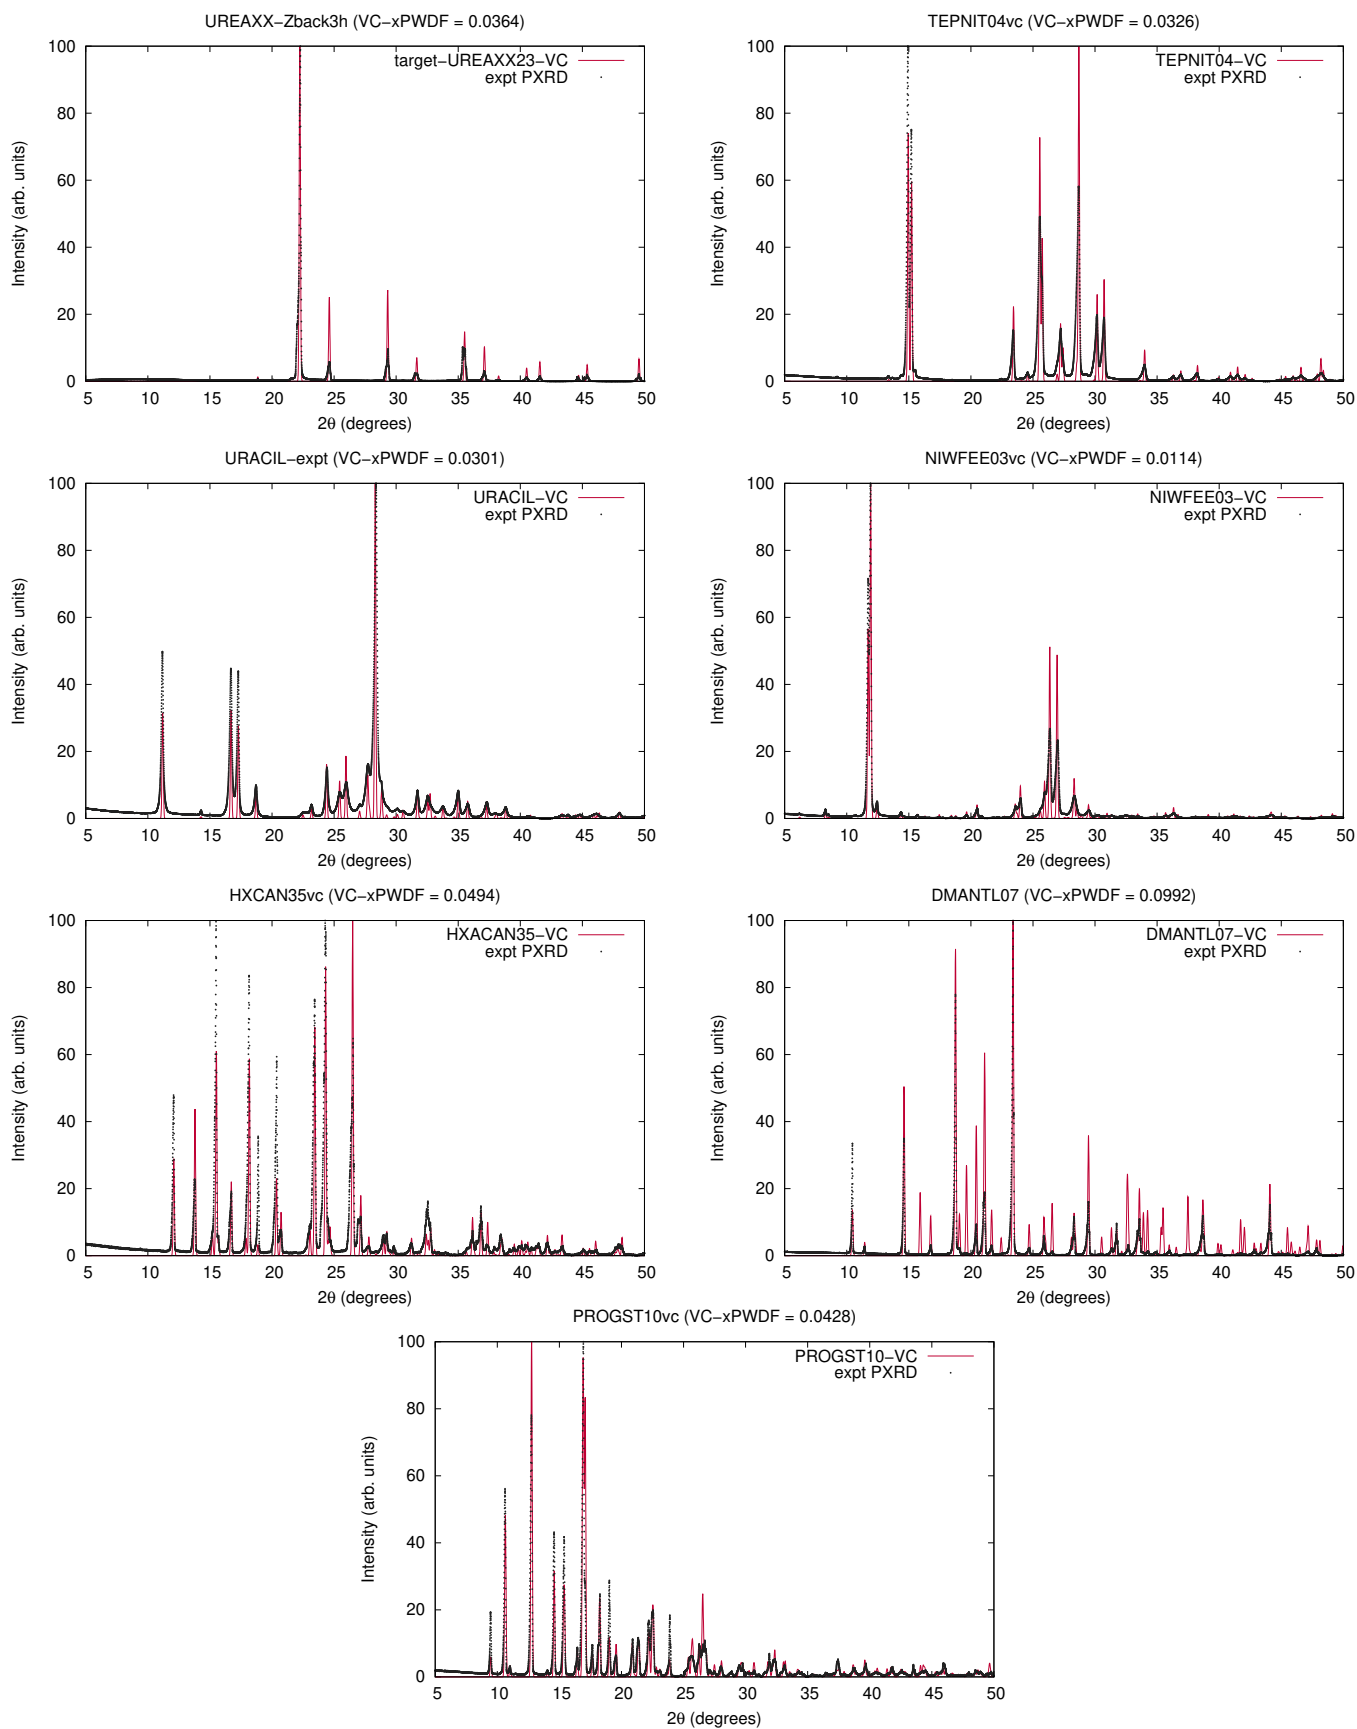

Figure S3: Overlays of the experimentally collected powder diffractograms with the simulated powder diffractogram of the matching polymorph from the CSD after running the VC-xPDF protocol.

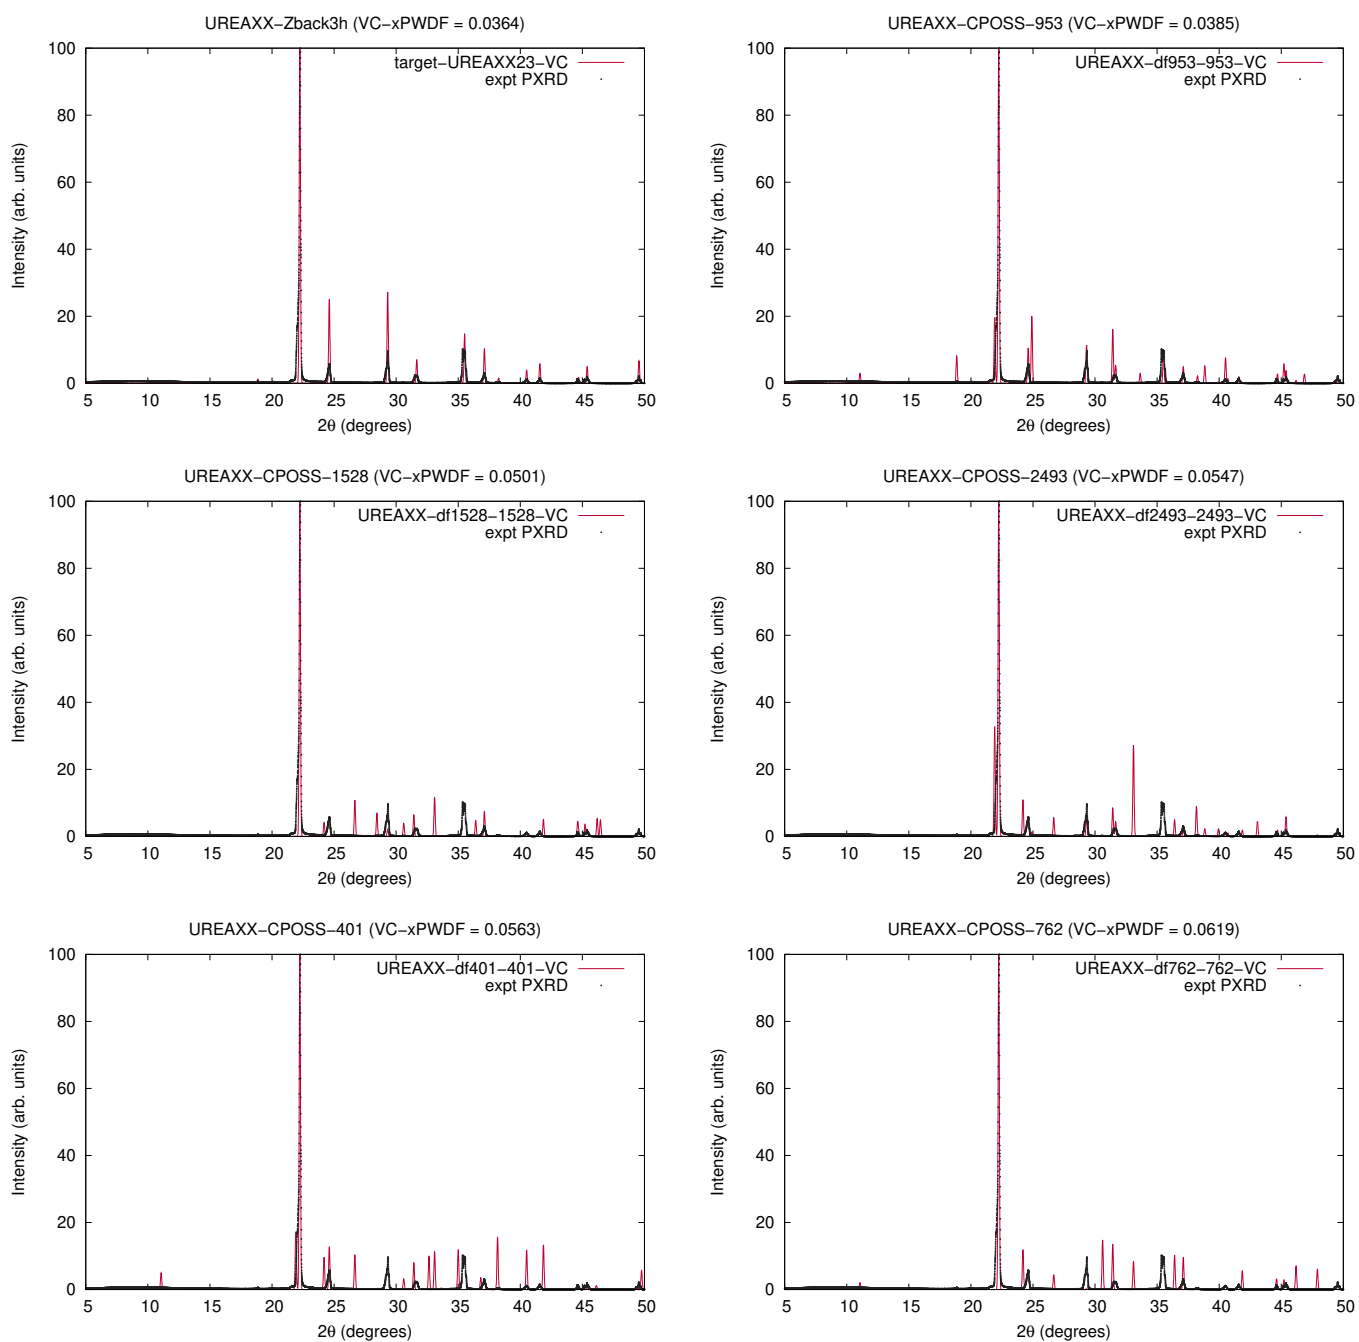

Figure S4: Overlay of simulated powder diffractograms of urea crystal structures after the VC-xPWDF protocol with the experimental powder diffractogram.

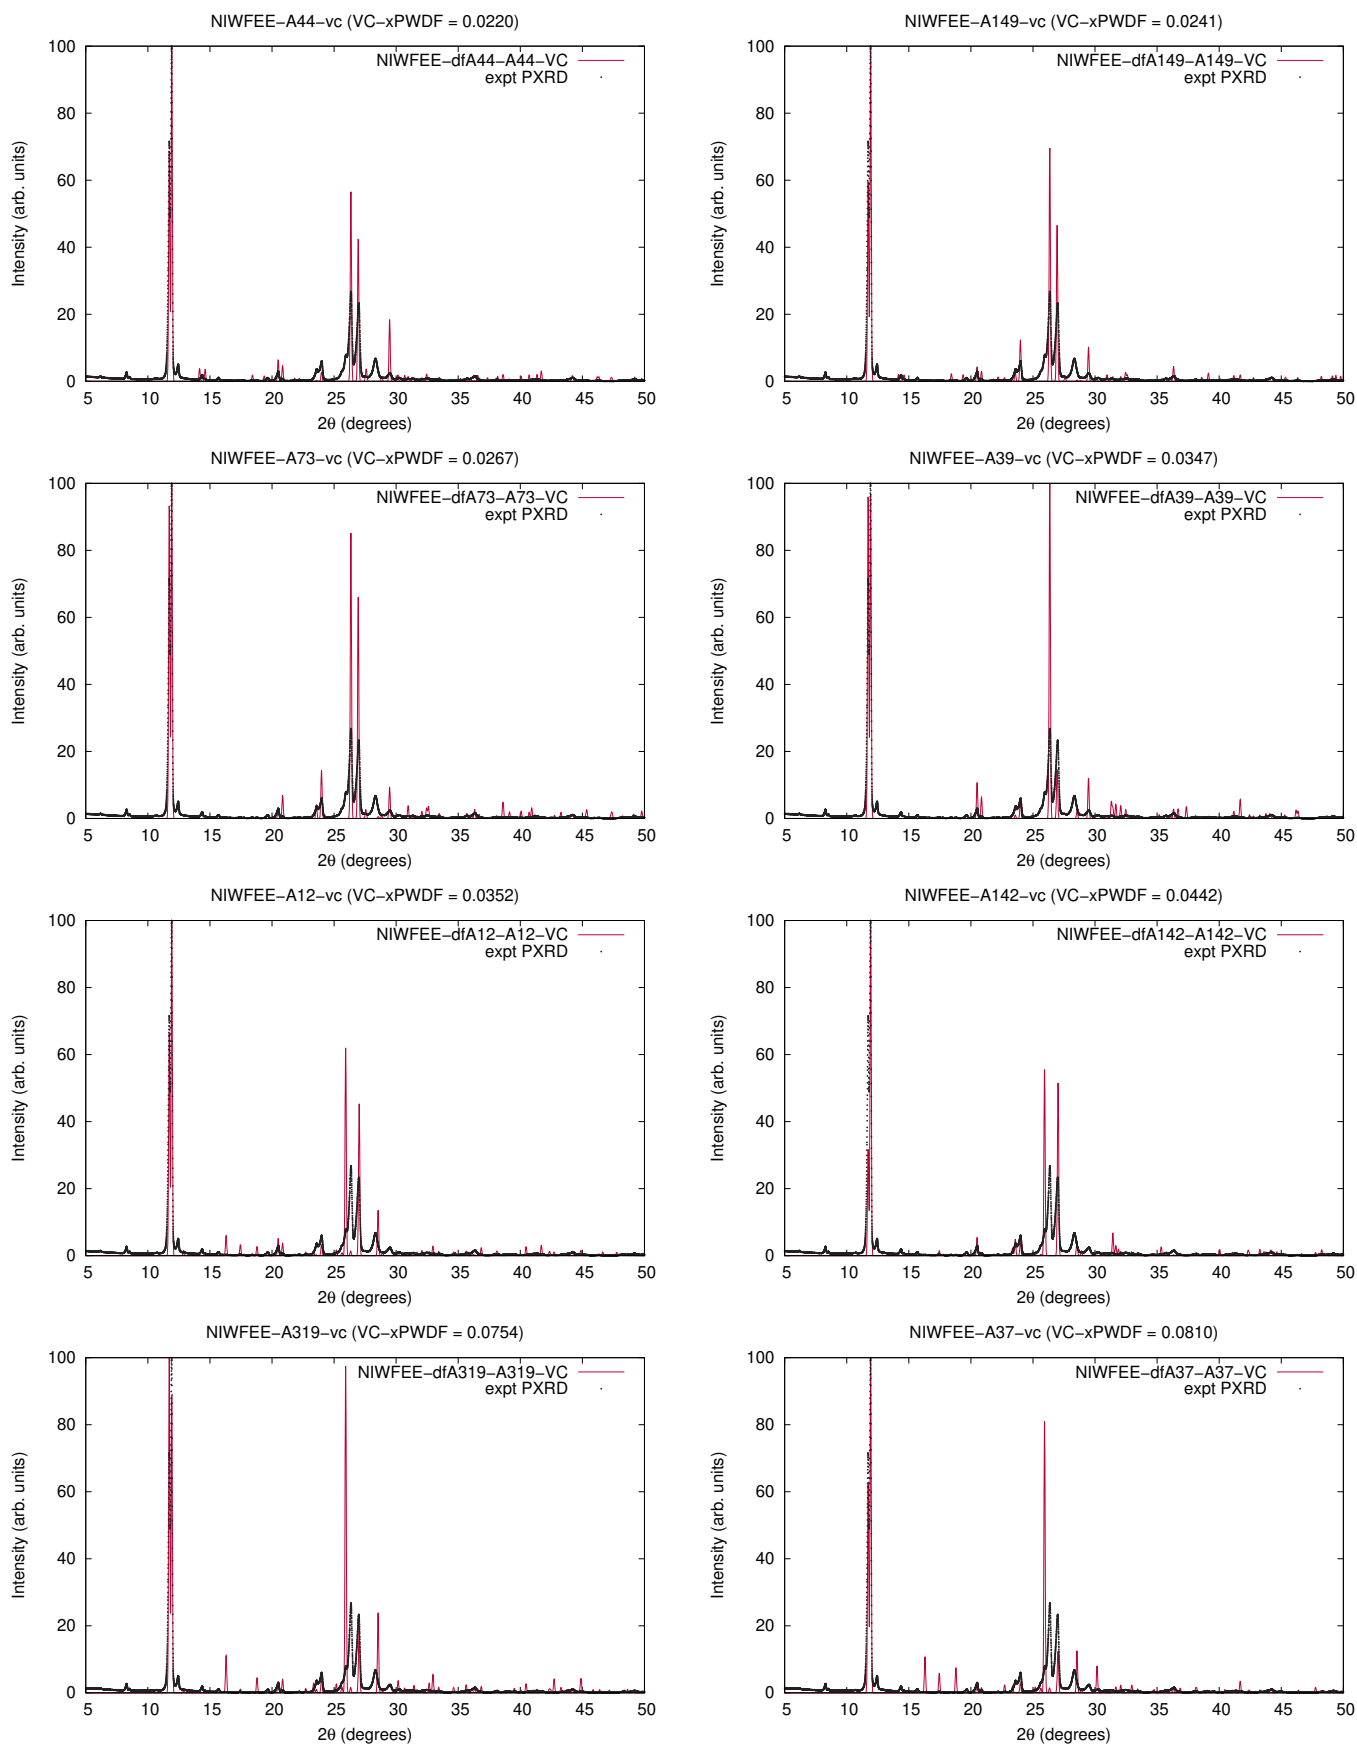

Figure S5: Overlay of simulated powder diffractograms of caffeine crystal structures after the VC-xPWDF protocol with the experimental powder diffractogram.



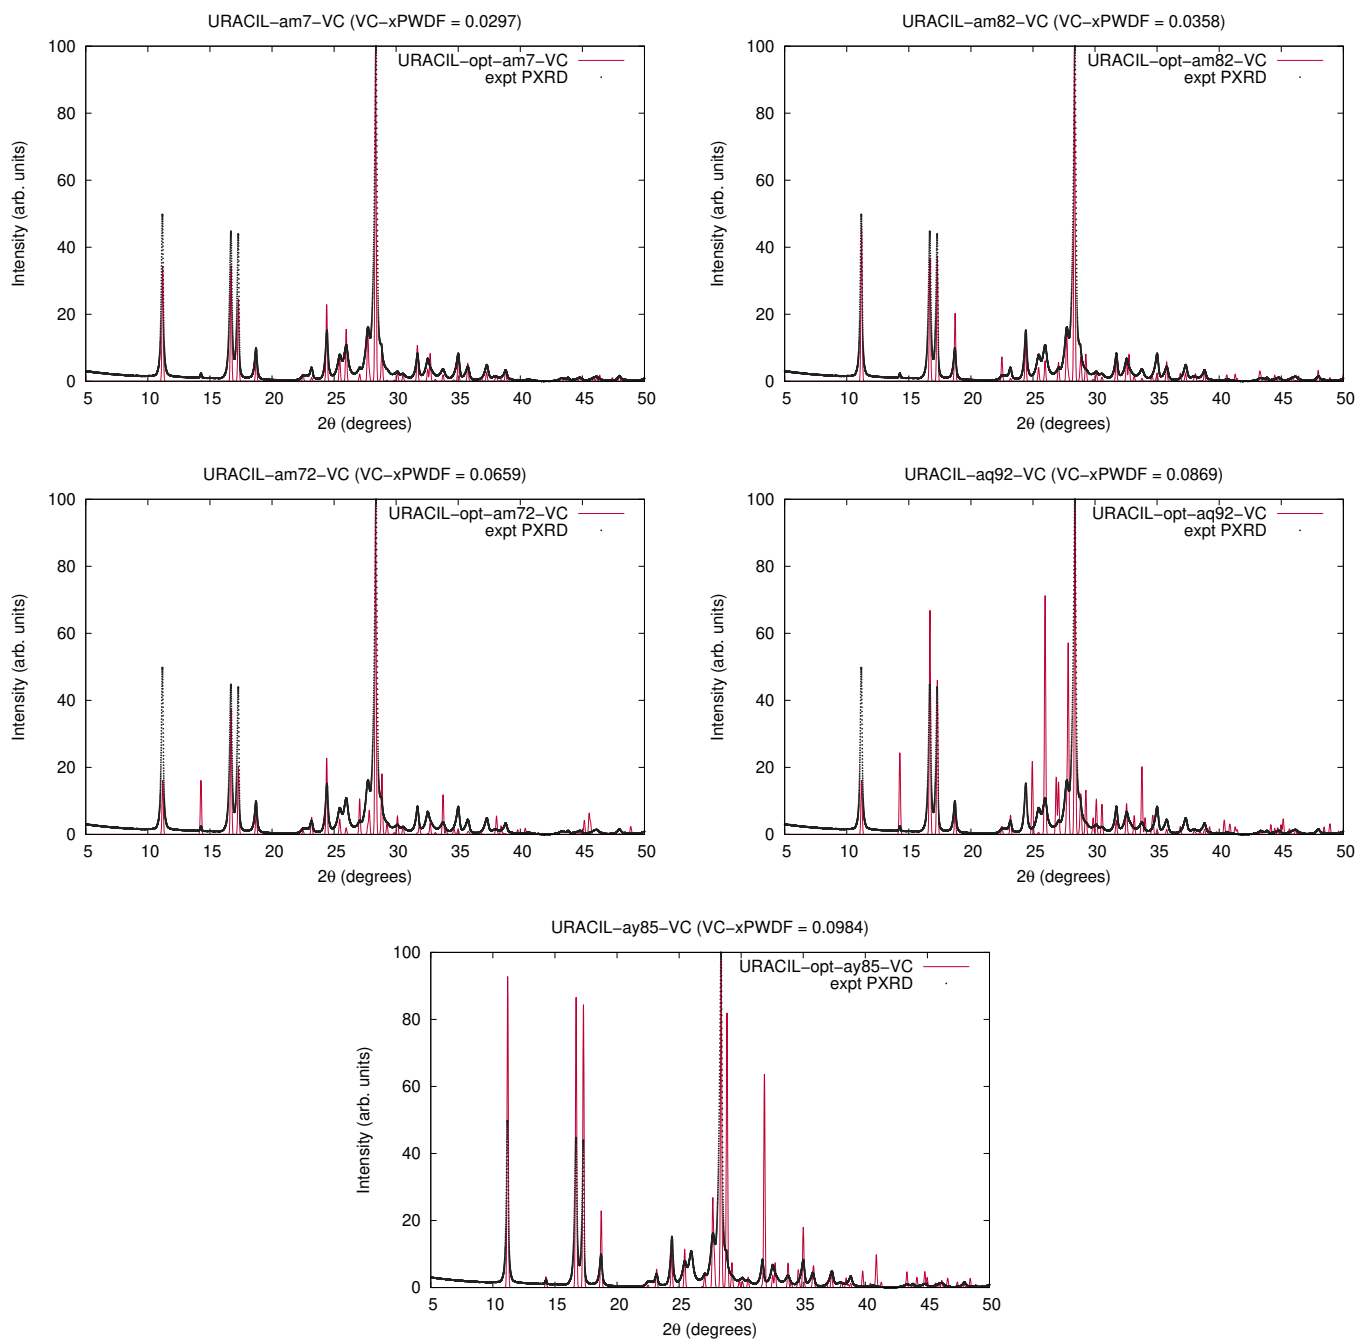

Figure S6: Overlay of simulated powder diffractograms of uracil crystal structures after the VC-xPWDF protocol with the experimental powder diffractogram.

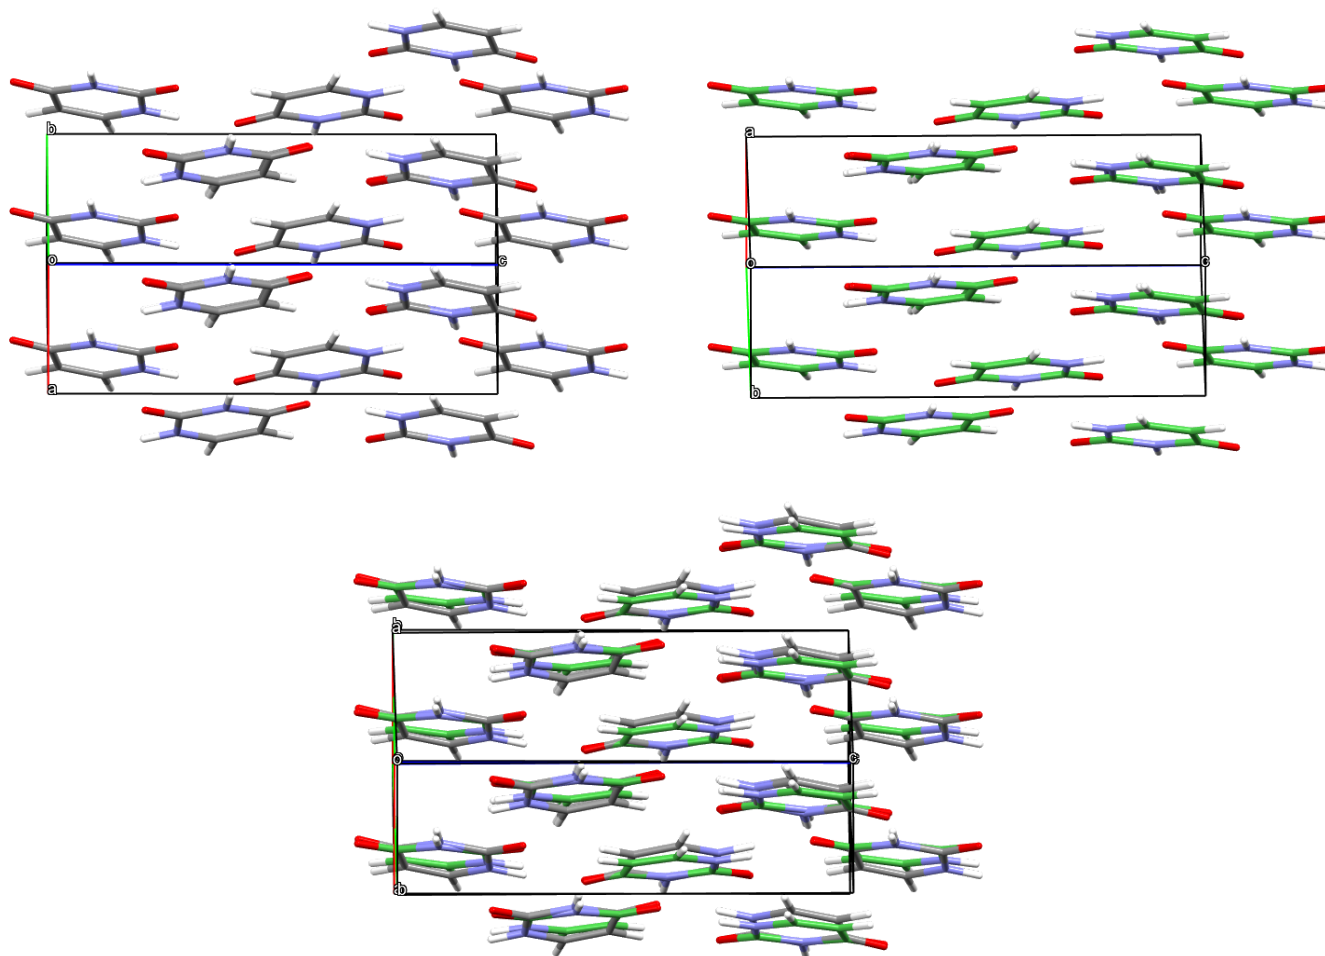

Figure S7: Images of the packing of two *in silico* generated crystal structures of uracil, am7 (top-left), and am82 (top-right), and an overlay of the two structures generated with the Crystal Packing Similarity tool's implementation of COMPACK[19] in the CCDC Mercury[20] software (V2022.2.0). The crystal structures used in these images had been modified with the VC-xPWDF protocol to match the experimental powder diffractogram.

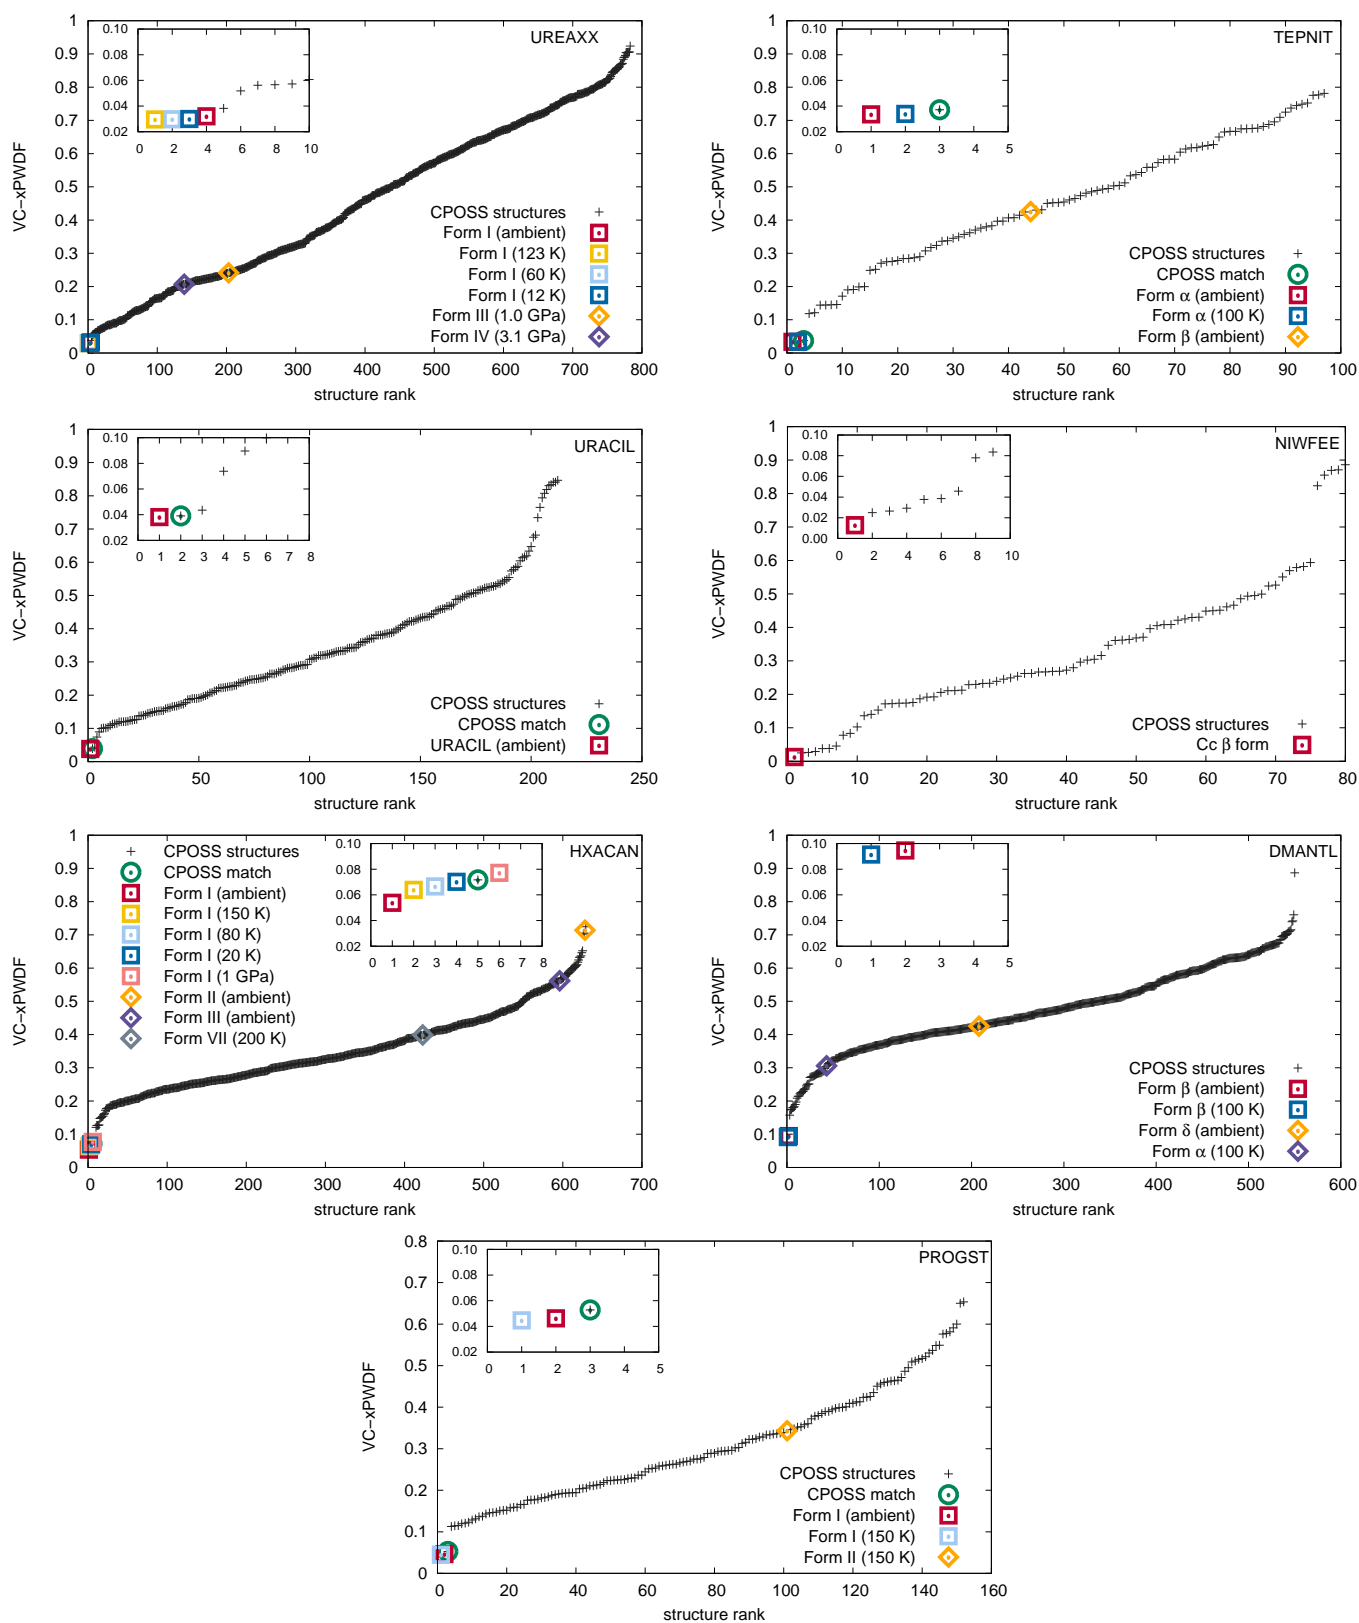

Figure S8: Plots showing the VC-xPWDF value from comparison of each input crystal structure to the experimental powder diffractogram collected from a 2 minute scan for that compound. The structures are ranked by lowest VC-xPWDF (most similar) and the insets provide views of the best matching structures (VC-xPWDF < 0.1). The point types indicate the source of each crystal structure: squares correspond to CSD structures of the matching polymorph, diamonds are CSD structures of different polymorphs, and + signs are CPOSS structures. If a matching structure is present in the CPOSS data, it is identified with a green circle.

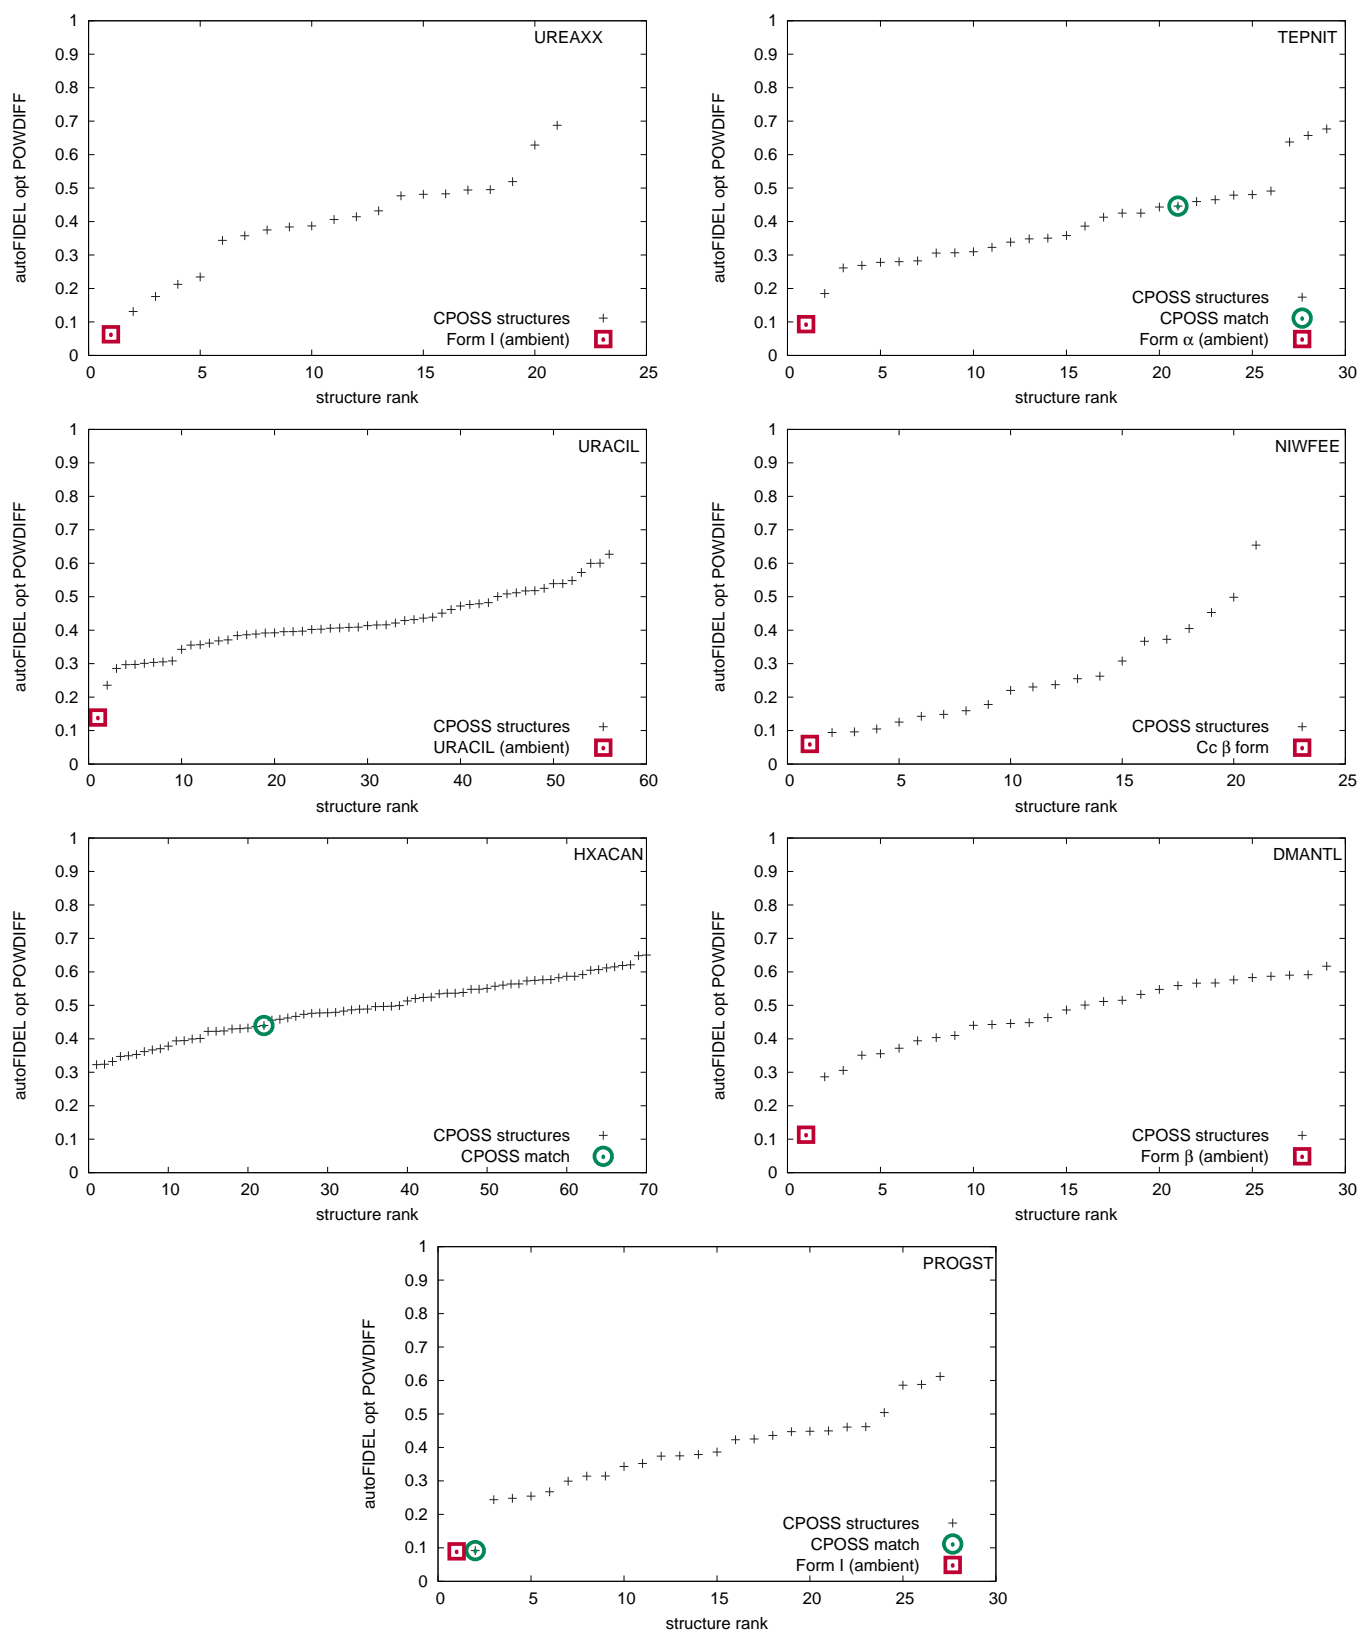

Figure S9: Plots showing the POWDIFF value after optimization with the autoFIDEL code between the crystal structure and the experimental powder diffractogram collected for that compound. The structures are ranked by smallest POWDIFF (most similar). The point types indicate the source of each crystal structure: squares correspond to CSD structures of the matching polymorph, diamonds are CSD structures of different polymorphs, and + signs are CPOSS structures. If a matching structure is present in the CPOSS data, it is identified with a green circle.

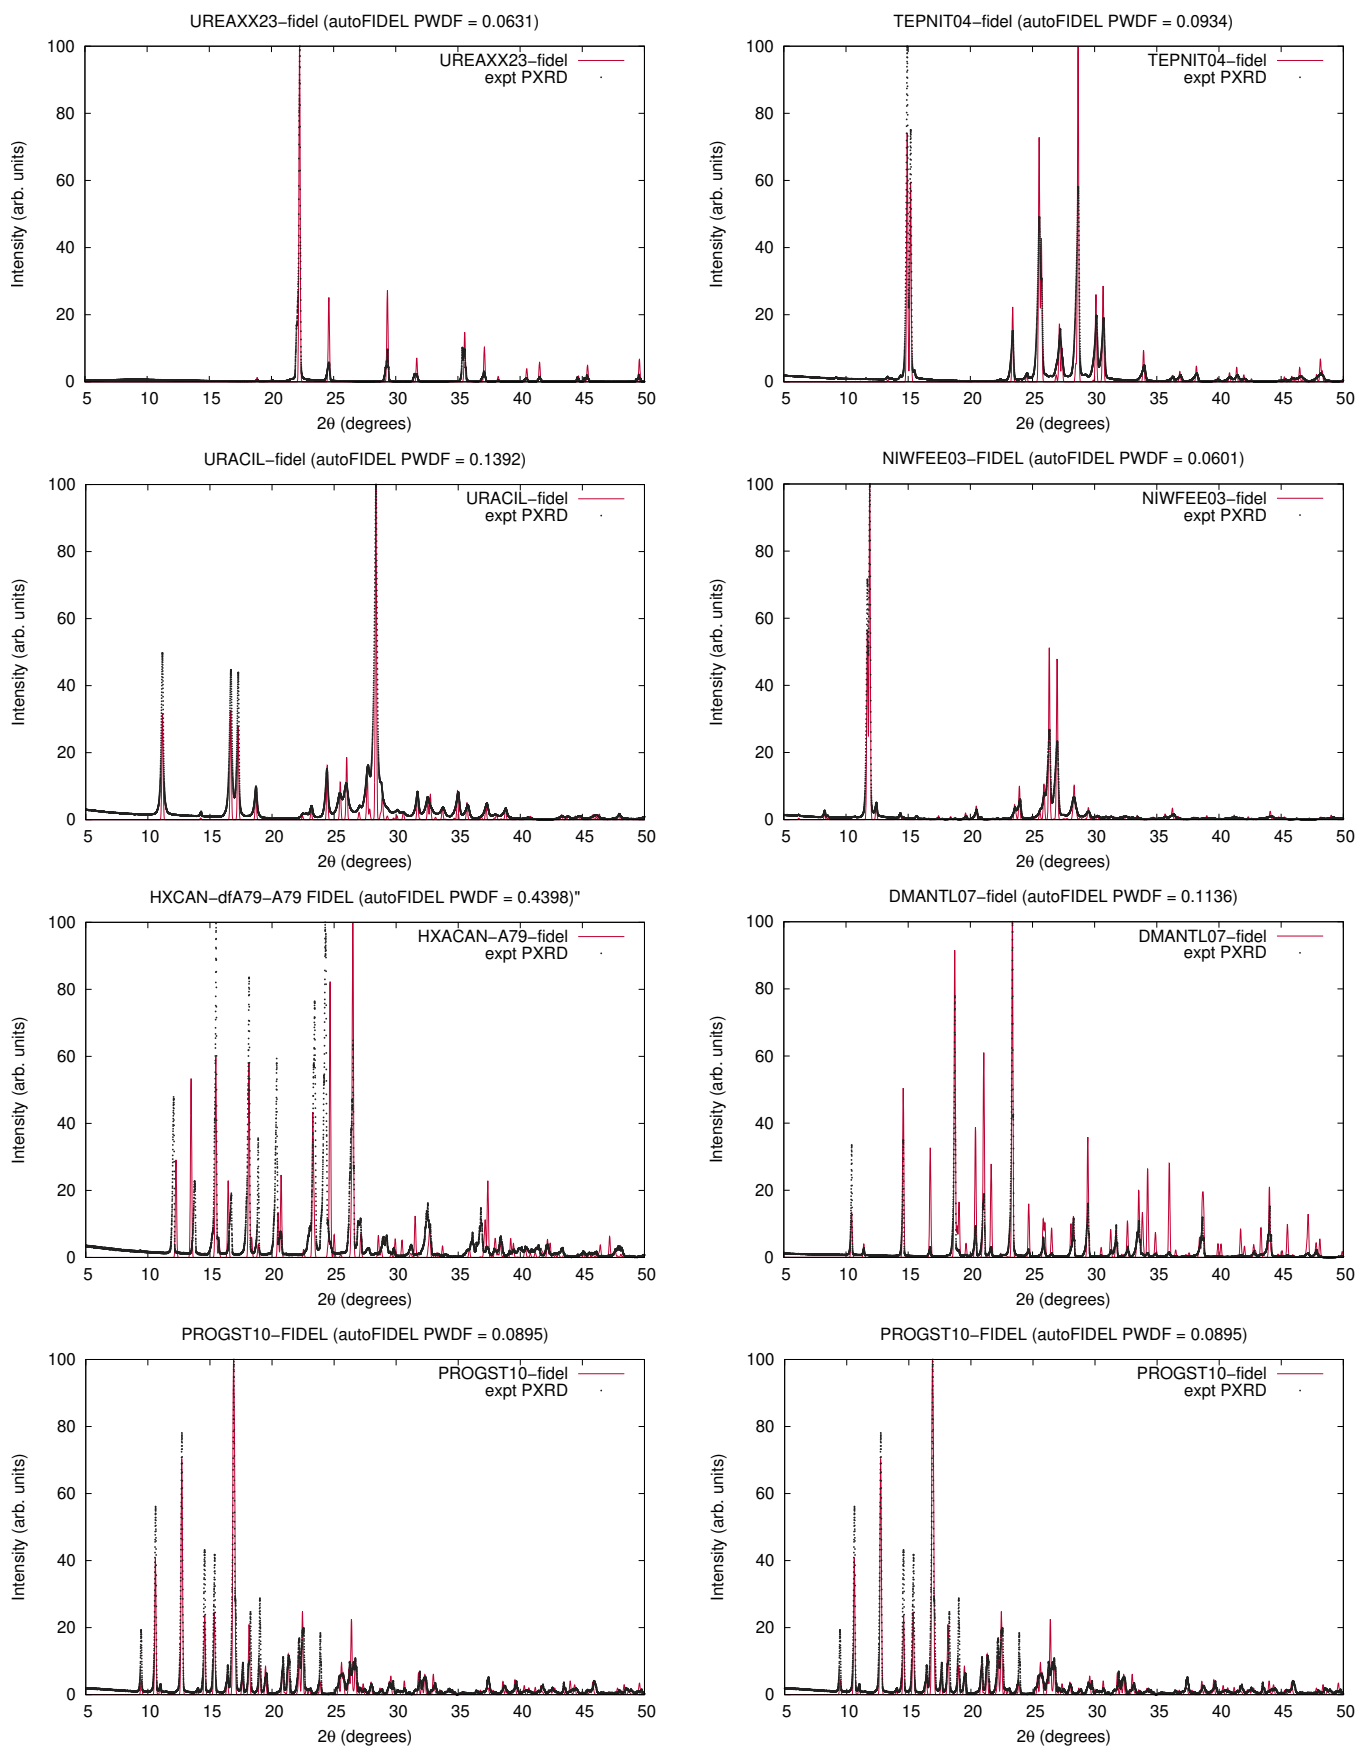

Figure S10: Overlay of simulated powder diffractograms from crystal structures after optimization with autoFIDEL with the experimental powder diffractogram.

## S4.1 Rietveld refinement

### S4.1.1 CSD structures

Rietveld refinement was performed on the matching CSD structures without modification and the results shown in Table S3. Clear correct alignment of the peaks was observed for all structures collected under ambient conditions, though the refinement values range from  $20.10\% < R_{wp} < 34.54\%$  and  $85.80 < \chi^2 < 307.41$ .

Table S3: Summary of  $R_{wp}$  and  $\chi^2$  values from Rietveld refinement of the same polymorph CSD structures with the collected powder diffractograms. A success indicates that the peak positions were properly aligned between the two patterns, even if the intensities did not perfectly overlay. A poor refinement is indicated for cases where peak positions remained unaligned at the completion of the refinement.

| CSD refcode | conditions | VC-xPWDF | $R_{wp}$ (%) | $\chi^2$ | refinement |
|-------------|------------|----------|--------------|----------|------------|
| UREAXX23    | RT         | 0.0364   | 30.06        | 178.49   | success    |
| UREAXX07    | 123 K      | 0.0335   | 41.69        | 343.32   | poor       |
| UREAXX11    | 60 K       | 0.0337   | 38.83        | 297.83   | poor       |
| UREAXX12    | 12 K       | 0.0339   | 39.95        | 315.26   | poor       |
| TEPNIT04    | RT         | 0.0326   | 22.14        | 112.22   | success    |
| TEPNIT14    | 100 K      | 0.0330   | 26.65        | 162.59   | poor       |
| URACIL      | RT         | 0.0290   | 20.10        | 85.80    | success    |
| NIWFEE03    | RT         | 0.0114   | 26.08        | 154.23   | success    |
| HXACAN35    | RT         | 0.0494   | 24.04        | 109.25   | success    |
| HXACAN04    | 150 K      | 0.0602   | 31.22        | 184.25   | success    |
| HXACAN15    | 80 K       | 0.0633   | 42.25        | 337.44   | poor       |
| HXACAN13    | 20 K       | 0.0670   | 32.73        | 202.51   | poor       |
| NIWFEE03    | RT         | 0.0114   | 26.08        | 154.23   | success    |
| DMANTL07    | RT         | 0.0992   | 33.90        | 197.86   | success    |
| DMANTL15    | 100 K      | 0.0962   | 36.61        | 256.66   | success    |
| PROGST10    | RT         | 0.0428   | 34.54        | 307.41   | success    |
| PROGST12    | 150 K      | 0.0416   | 35.43        | 323.45   | success    |

### S4.1.2 CPOSS and VC-corrected structures

Table S4: Summary of  $R_{wp}$  and  $\chi^2$  values from Rietveld refinement of uracil structures with the collected powder diffractograms. A success indicates that the peak positions were properly aligned between the two patterns, even if the intensities did not perfectly overlay. A poor refinement is indicated for cases where peak positions remained unaligned at the completion of the refinement.

| structure          | rank | VC-xPWDF | $\Delta H$ (kJ/mol) | $R_{wp}$ (%) | $\chi^2$ | refinement |
|--------------------|------|----------|---------------------|--------------|----------|------------|
| URACIL-vc          | 1    | 0.0290   | -                   | 15.40        | 50.36    | success    |
| URACIL_opt_am7-vc  | 2    | 0.0297   | 0.0                 | 17.43        | 64.52    | success    |
| URACIL_opt_am82-vc | 3    | 0.0358   | 0.5                 | 19.73        | 82.67    | success    |
| URACIL_opt_am72-vc | 4    | 0.0659   | 2.0                 | 38.62        | 316.74   | poor       |
| URACIL_opt_aq92-vc | 5    | 0.0869   | 4.3                 | 43.56        | 402.95   | poor       |
| URACIL_opt_ay85-vc | 6    | 0.0984   | 7.6                 | 21.78        | 100.74   | poor       |

Table S5: Summary of Rwp and  $\chi^2$  values from Rietveld refinement of caffeine structures with the collected powder diffractograms. A success indicates that the peak positions were properly aligned between the two patterns, even if the intensities did not perfectly overlay. A poor refinement is indicated for cases where peak positions remained unaligned at the completion of the refinement.

| structure             | rank | VC-xPWDF | $\Delta H$ (kJ/mol) | Rwp (%) | $\chi^2$ | refinement |
|-----------------------|------|----------|---------------------|---------|----------|------------|
| NIWFEE03-vc           | 1    | 0.0114   | -                   | 21.28   | 102.68   | success    |
| NIWFEE_dfA44_A44-vc   | 2    | 0.0220   | 7.0                 | 32.45   | 238.78   | poor       |
| NIWFEE_dfA149_A149-vc | 3    | 0.0241   | 6.2                 | 33.88   | 260.28   | poor       |
| NIWFEE_dfA73_A73-vc   | 4    | 0.0267   | 0.0                 | 32.46   | 238.92   | poor       |
| NIWFEE_dfA39_A39-vc   | 5    | 0.0347   | 10.7                | 25.77   | 150.59   | poor       |
| NIWFEE_dfA12_A12-vc   | 6    | 0.0352   | 8.1                 | 32.18   | 234.82   | poor       |
| NIWFEE_dfA142_A142-vc | 7    | 0.0442   | 3.1                 | 25.76   | 150.47   | poor       |
| NIWFEE_dfA319_A319-vc | 8    | 0.0754   | 10.8                | 33.60   | 256.00   | poor       |
| NIWFEE_dfA37_A37-vc   | 9    | 0.0810   | 10.1                | 37.27   | 314.98   | poor       |

Table S6: Summary of Rwp and  $\chi^2$  values from Rietveld refinement of urea structures with the collected powder diffractograms. A success indicates that the peak positions were properly aligned between the two patterns, even if the intensities did not perfectly overlay. A poor refinement is indicated for cases where peak positions remained unaligned at the completion of the refinement.

| structure          | rank | VC-xPWDF | $\Delta H$ (kJ/mol) | Rwp (%) | $\chi^2$ | refinement |
|--------------------|------|----------|---------------------|---------|----------|------------|
| UREAXX23-vc        | 4    | 0.0364   | -                   | 20.26   | 81.08    | success    |
| UREAXX_df953_953   | 5    | 0.0385   | 14.9                | 40.07   | 317.16   | poor       |
| UREAXX_df1528_1528 | 6    | 0.0501   | 17.7                | 61.33   | 742.99   | very poor  |
| UREAXX_df2493_2493 | 7    | 0.0547   | 19.7                | 61.53   | 747.84   | very poor  |
| UREAXX_df401_401   | 8    | 0.0563   | 11.8                | 60.52   | 723.49   | very poor  |
| UREAXX_df762_762   | 9    | 0.0619   | 15.9                | 60.51   | 723.25   | very poor  |

## S4.2 Data tables

Table S7: Summary of data for urea. Relative enthalpy is given in kJ/mol, ranks are according to the next-right column, autoFIDEL comparisons were made with the default program parameters and the experimental powder diffractograms collected over 3 hrs.

| structure | duplicates | $\Delta H$ | rank | VC-xPWDF (3h) | rank | VC-xPWDF (2m) | rank | autoFIDEL |
|-----------|------------|------------|------|---------------|------|---------------|------|-----------|
| UREAXX07  | -          | -          | 1    | 0.0335        | 1    | 0.0296        | -    | -         |
| UREAXX11  | -          | -          | 2    | 0.0337        | 2    | 0.0297        | -    | -         |
| UREAXX12  | -          | -          | 3    | 0.0339        | 3    | 0.0300        | -    | -         |
| UREAXX23  | -          | -          | 4    | 0.0364        | 4    | 0.0320        | 1    | 0.0631    |
| df953     | 0          | 19.9       | 5    | 0.0385        | 5    | 0.0382        | -    | -         |
| df1528    | 0          | 22.8       | 6    | 0.0501        | 6    | 0.0519        | -    | -         |
| df2493    | 0          | 24.7       | 7    | 0.0547        | 7    | 0.0562        | -    | -         |
| df401     | 0          | 16.9       | 8    | 0.0563        | 8    | 0.0566        | -    | -         |
| df762     | 0          | 21         | 9    | 0.0619        | 13   | 0.0631        | -    | -         |
| df1994    | 0          | 28.3       | 10   | 0.0621        | 9    | 0.0572        | -    | -         |
| df2382    | 0          | 15.9       | 11   | 0.0626        | 10   | 0.0607        | -    | -         |
| df2004    | 0          | 26.4       | 12   | 0.0626        | 11   | 0.0619        | -    | -         |
| df458     | 0          | 17.1       | 13   | 0.0640        | 12   | 0.0626        | -    | -         |
| df626     | 0          | 19.1       | 14   | 0.0681        | 14   | 0.0677        | -    | -         |
| df2152    | 0          | 27.7       | 15   | 0.0683        | 19   | 0.0728        | -    | -         |
| df1551    | 0          | 20.1       | 16   | 0.0697        | 15   | 0.0678        | -    | -         |
| df418     | 0          | 17.4       | 17   | 0.0741        | 20   | 0.0734        | -    | -         |
| df937     | 0          | 18         | 18   | 0.0755        | 17   | 0.0701        | -    | -         |
| df406     | 0          | 18.7       | 19   | 0.0758        | 21   | 0.0744        | -    | -         |
| df99      | 0          | 15.3       | 20   | 0.0764        | 16   | 0.0689        | -    | -         |
| df506     | 0          | 18.4       | 21   | 0.0765        | 18   | 0.0716        | -    | -         |
| df340     | 0          | 17.2       | 22   | 0.0787        | 25   | 0.0804        | -    | -         |
| df2065    | 0          | 25.2       | 23   | 0.0790        | 32   | 0.0847        | -    | -         |
| df268     | 0          | 16.5       | 24   | 0.0822        | 23   | 0.0761        | -    | -         |
| df859     | 0          | 21.1       | 25   | 0.0828        | 24   | 0.0768        | -    | -         |
| df894     | 0          | 16.9       | 26   | 0.0829        | 22   | 0.0761        | -    | -         |
| df2016    | 0          | 24.3       | 27   | 0.0855        | 26   | 0.0809        | -    | -         |
| df938     | 0          | 21.4       | 28   | 0.0858        | 35   | 0.0873        | -    | -         |
| df1817    | 0          | 14.9       | 29   | 0.0876        | 27   | 0.0821        | -    | -         |
| df2494    | 0          | 23.1       | 30   | 0.0882        | 31   | 0.0847        | -    | -         |
| df685     | 0          | 17.6       | 31   | 0.0890        | 33   | 0.0853        | -    | -         |
| df139     | 0          | 16.5       | 32   | 0.0898        | 39   | 0.0899        | -    | -         |
| df1127    | 0          | 16.5       | 33   | 0.0901        | 28   | 0.0831        | -    | -         |
| df900     | 0          | 13.8       | 34   | 0.0915        | 34   | 0.0868        | -    | -         |
| df1816    | 2          | 5          | 35   | 0.0926        | 30   | 0.0847        | -    | -         |
| df1577    | 0          | 14.2       | 36   | 0.0927        | 38   | 0.0898        | -    | -         |
| df1051    | 0          | 15.7       | 37   | 0.0934        | 29   | 0.0846        | -    | -         |
| df945     | 0          | 19.3       | 38   | 0.0954        | 45   | 0.0975        | -    | -         |
| df1394    | 0          | 14.2       | 39   | 0.0955        | 37   | 0.0897        | -    | -         |

continued...



| structure | duplicates | $\Delta H$ | rank | VC-xPWDF (3h) | rank | VC-xPWDF (2m) | rank | autoFIDEL |
|-----------|------------|------------|------|---------------|------|---------------|------|-----------|
| df186     | 0          | 18         | 40   | 0.0955        | 49   | 0.0983        | -    | -         |
| df1020    | 0          | 15         | 41   | 0.0959        | 48   | 0.0982        | -    | -         |
| df2264    | 0          | 14.1       | 42   | 0.0960        | 43   | 0.0945        | -    | -         |
| df154     | 0          | 16.7       | 43   | 0.0972        | 42   | 0.0922        | -    | -         |
| df790     | 0          | 19.7       | 44   | 0.0977        | 41   | 0.0908        | -    | -         |
| df1036    | 0          | 17.7       | 45   | 0.0981        | 40   | 0.0899        | -    | -         |
| df2246    | 0          | 31.5       | 46   | 0.1000        | 36   | 0.0892        | -    | -         |
| df1422    | 0          | 22.3       | 47   | 0.1026        | 52   | 0.1011        | -    | -         |
| df1503    | 0          | 23.8       | 48   | 0.1035        | 47   | 0.0977        | -    | -         |
| df1095    | 0          | 19.4       | 49   | 0.1037        | 46   | 0.0975        | -    | -         |
| df1541    | 0          | 9.3        | 50   | 0.1058        | 50   | 0.0997        | -    | -         |
| df1576    | 0          | 20.1       | 51   | 0.1073        | 55   | 0.1061        | 4    | 0.2124    |
| df1864    | 0          | 27.9       | 52   | 0.1078        | 51   | 0.1006        | -    | -         |
| df649     | 0          | 20.5       | 53   | 0.1089        | 53   | 0.1020        | -    | -         |
| df351     | 0          | 14.2       | 54   | 0.1092        | 57   | 0.1123        | -    | -         |
| df2168    | 0          | 15.2       | 55   | 0.1094        | 54   | 0.1042        | -    | -         |
| df628     | 0          | 9.5        | 56   | 0.1111        | 56   | 0.1071        | -    | -         |
| df552     | 0          | 19.6       | 57   | 0.1117        | 58   | 0.1131        | -    | -         |
| df895     | 0          | 17.9       | 58   | 0.1122        | 59   | 0.1131        | -    | -         |
| df1453    | 0          | 21.8       | 59   | 0.1124        | 44   | 0.0948        | -    | -         |
| df639     | 0          | 17.1       | 60   | 0.1152        | 61   | 0.1159        | -    | -         |
| df744     | 0          | 17.7       | 61   | 0.1203        | 62   | 0.1170        | -    | -         |
| df1116    | 0          | 14         | 62   | 0.1220        | 60   | 0.1151        | -    | -         |
| df1564    | 0          | 17.4       | 63   | 0.1258        | 67   | 0.1251        | -    | -         |
| df319     | 0          | 14         | 64   | 0.1258        | 65   | 0.1235        | -    | -         |
| df449     | 0          | 7.7        | 65   | 0.1279        | 68   | 0.1265        | -    | -         |
| df2053    | 0          | 15.6       | 66   | 0.1284        | 63   | 0.1199        | -    | -         |
| df526     | 0          | 7.5        | 67   | 0.1295        | 70   | 0.1279        | -    | -         |
| df532     | 0          | 7.5        | 68   | 0.1297        | 72   | 0.1281        | -    | -         |
| df622     | 0          | 18.7       | 69   | 0.1309        | 73   | 0.1287        | -    | -         |
| df2273    | 0          | 24.2       | 70   | 0.1317        | 71   | 0.1280        | -    | -         |
| df1466    | 0          | 15.8       | 71   | 0.1318        | 66   | 0.1236        | -    | -         |
| df2079    | 0          | 17         | 72   | 0.1328        | 77   | 0.1327        | -    | -         |
| df1216    | 0          | 17.6       | 73   | 0.1334        | 64   | 0.1214        | -    | -         |
| df1360    | 0          | 19.5       | 74   | 0.1338        | 80   | 0.1358        | -    | -         |
| df843     | 0          | 19.1       | 75   | 0.1361        | 74   | 0.1298        | -    | -         |
| df2096    | 0          | 22.7       | 76   | 0.1384        | 75   | 0.1300        | -    | -         |
| df1840    | 0          | 5.3        | 77   | 0.1397        | 69   | 0.1277        | -    | -         |
| df745     | 0          | 17.9       | 78   | 0.1411        | 82   | 0.1379        | -    | -         |
| df2068    | 0          | 23.9       | 79   | 0.1419        | 79   | 0.1344        | -    | -         |
| df617     | 0          | 17.2       | 80   | 0.1457        | 87   | 0.1424        | 5    | 0.2346    |
| df1188    | 0          | 17.7       | 81   | 0.1469        | 83   | 0.1392        | -    | -         |
| df621     | 0          | 19.1       | 82   | 0.1475        | 76   | 0.1312        | -    | -         |
| df1805    | 0          | 25.6       | 83   | 0.1478        | 81   | 0.1376        | -    | -         |

continued...

| structure | duplicates | $\Delta H$ | rank | VC-xPWDF (3h) | rank | VC-xPWDF (2m) | rank | autoFIDEL |
|-----------|------------|------------|------|---------------|------|---------------|------|-----------|
| df1823    | 0          | 19.2       | 84   | 0.1516        | 86   | 0.1408        | -    | -         |
| df2147    | 0          | 1.2        | 85   | 0.1524        | 84   | 0.1396        | -    | -         |
| df1081    | 0          | 16.9       | 86   | 0.1527        | 85   | 0.1407        | -    | -         |
| df1790    | 0          | 23.3       | 87   | 0.1528        | 88   | 0.1466        | -    | -         |
| df1023    | 1          | 8.5        | 88   | 0.1537        | 78   | 0.1333        | -    | -         |
| df502     | 0          | 12.8       | 89   | 0.1616        | 89   | 0.1530        | -    | -         |
| df2399    | 0          | 13.8       | 90   | 0.1619        | 93   | 0.1575        | -    | -         |
| df2092    | 0          | 17.4       | 91   | 0.1624        | 90   | 0.1542        | -    | -         |
| df2034    | 0          | 24.3       | 92   | 0.1630        | 94   | 0.1580        | -    | -         |
| df1850    | 0          | 19.7       | 93   | 0.1644        | 102  | 0.1652        | -    | -         |
| df671     | 0          | 15.7       | 94   | 0.1646        | 105  | 0.1660        | -    | -         |
| df1867    | 0          | 10.3       | 95   | 0.1648        | 98   | 0.1633        | -    | -         |
| df1343    | 0          | 20.3       | 96   | 0.1653        | 91   | 0.1544        | -    | -         |
| df2002    | 0          | 24.7       | 97   | 0.1673        | 95   | 0.1608        | -    | -         |
| df2122    | 0          | 23.2       | 98   | 0.1677        | 92   | 0.1546        | -    | -         |
| df1932    | 0          | 22.8       | 99   | 0.1697        | 106  | 0.1662        | -    | -         |
| df689     | 0          | 17.2       | 100  | 0.1712        | 96   | 0.1629        | -    | -         |
| df1776    | 0          | 17.1       | 101  | 0.1728        | 110  | 0.1734        | -    | -         |
| df990     | 0          | 17.4       | 102  | 0.1731        | 107  | 0.1686        | -    | -         |
| df1549    | 1          | 10.4       | 103  | 0.1734        | 104  | 0.1657        | -    | -         |
| df1858    | 0          | 18.1       | 104  | 0.1743        | 103  | 0.1654        | -    | -         |
| df932     | 0          | 25         | 105  | 0.1772        | 99   | 0.1640        | -    | -         |
| df501     | 0          | 12         | 106  | 0.1776        | 109  | 0.1723        | -    | -         |
| df1363    | 0          | 18.4       | 107  | 0.1792        | 108  | 0.1721        | -    | -         |
| df1009    | 0          | 20.3       | 108  | 0.1796        | 97   | 0.1633        | -    | -         |
| df1287    | 0          | 18.4       | 109  | 0.1810        | 111  | 0.1740        | -    | -         |
| df1426    | 0          | 19.8       | 110  | 0.1824        | 100  | 0.1645        | -    | -         |
| df2027    | 0          | 14         | 111  | 0.1837        | 117  | 0.1847        | -    | -         |
| df667     | 0          | 17.5       | 112  | 0.1856        | 116  | 0.1844        | -    | -         |
| df943     | 0          | 14.4       | 113  | 0.1858        | 118  | 0.1848        | -    | -         |
| df240     | 0          | 14.6       | 114  | 0.1868        | 101  | 0.1647        | -    | -         |
| df447     | 0          | 12.9       | 115  | 0.1877        | 115  | 0.1839        | -    | -         |
| df2452    | 0          | 14.1       | 116  | 0.1878        | 112  | 0.1785        | -    | -         |
| df887     | 0          | 14.6       | 117  | 0.1902        | 122  | 0.1876        | -    | -         |
| df2597    | 0          | 18.7       | 118  | 0.1910        | 121  | 0.1870        | -    | -         |
| df676     | 0          | 15.4       | 119  | 0.1967        | 114  | 0.1807        | -    | -         |
| df485     | 0          | 12.6       | 120  | 0.1990        | 120  | 0.1863        | -    | -         |
| df420     | 0          | 13.9       | 121  | 0.2003        | 131  | 0.2003        | -    | -         |
| df341     | 0          | 10.4       | 122  | 0.2007        | 119  | 0.1853        | -    | -         |
| df207     | 0          | 5.4        | 123  | 0.2020        | 113  | 0.1803        | -    | -         |
| df2321    | 1          | 10.3       | 124  | 0.2033        | 123  | 0.1881        | -    | -         |
| df204     | 0          | 14.5       | 125  | 0.2044        | 133  | 0.2008        | -    | -         |
| df136     | 0          | 11.9       | 126  | 0.2051        | 136  | 0.2042        | -    | -         |
| df1152    | 0          | 21.9       | 127  | 0.2051        | 124  | 0.1913        | -    | -         |

continued...

| structure | duplicates | $\Delta H$ | rank | VC-xPWDF (3h) | rank | VC-xPWDF (2m) | rank | autoFIDEL |
|-----------|------------|------------|------|---------------|------|---------------|------|-----------|
| df172     | 0          | 8.9        | 128  | 0.2064        | 140  | 0.2073        | -    | -         |
| df302     | 0          | 9.4        | 129  | 0.2071        | 138  | 0.2066        | -    | -         |
| UREAXX26  | -          | -          | 130  | 0.2087        | 139  | 0.2070        | -    | -         |
| df143     | 0          | 16.1       | 131  | 0.2099        | 128  | 0.1998        | -    | -         |
| df390     | 0          | 13.5       | 132  | 0.2103        | 132  | 0.2006        | -    | -         |
| df2105    | 0          | 17.2       | 133  | 0.2113        | 135  | 0.2037        | -    | -         |
| df630     | 0          | 18.4       | 134  | 0.2115        | 158  | 0.2179        | -    | -         |
| df217     | 0          | 13.6       | 135  | 0.2116        | 144  | 0.2087        | 20   | 0.6286    |
| df1113    | 0          | 22         | 136  | 0.2125        | 137  | 0.2062        | -    | -         |
| df1329    | 0          | 21.6       | 137  | 0.2126        | 150  | 0.2132        | -    | -         |
| df318     | 1          | 13.2       | 138  | 0.2130        | 146  | 0.2103        | -    | -         |
| df1073    | 0          | 13.3       | 139  | 0.2134        | 126  | 0.1970        | -    | -         |
| df917     | 0          | 21.1       | 140  | 0.2138        | 125  | 0.1962        | -    | -         |
| df682     | 2          | 0.9        | 141  | 0.2148        | 129  | 0.2000        | -    | -         |
| df2012    | 0          | 11         | 142  | 0.2152        | 127  | 0.1995        | -    | -         |
| df2156    | 0          | 18.5       | 143  | 0.2155        | 143  | 0.2084        | -    | -         |
| df1512    | 0          | 16.5       | 144  | 0.2159        | 130  | 0.2000        | -    | -         |
| df81      | 0          | 10.6       | 145  | 0.2176        | 142  | 0.2081        | -    | -         |
| df315     | 0          | 10         | 146  | 0.2189        | 147  | 0.2106        | -    | -         |
| df2374    | 0          | 24.4       | 147  | 0.2190        | 179  | 0.2259        | -    | -         |
| df732     | 0          | 15.5       | 148  | 0.2196        | 153  | 0.2156        | -    | -         |
| df1291    | 0          | 20.5       | 149  | 0.2200        | 134  | 0.2010        | -    | -         |
| df647     | 0          | 18.5       | 150  | 0.2208        | 170  | 0.2225        | -    | -         |
| df781     | 0          | 18.1       | 151  | 0.2210        | 152  | 0.2140        | -    | -         |
| df2141    | 0          | 18.5       | 152  | 0.2211        | 169  | 0.2224        | -    | -         |
| df795     | 0          | 19.4       | 153  | 0.2213        | 155  | 0.2175        | -    | -         |
| df832     | 0          | 14.9       | 154  | 0.2235        | 168  | 0.2220        | -    | -         |
| df1996    | 0          | 11.5       | 155  | 0.2238        | 148  | 0.2113        | -    | -         |
| df1813    | 0          | 19.1       | 156  | 0.2243        | 154  | 0.2162        | -    | -         |
| df1256    | 0          | 15.7       | 157  | 0.2248        | 141  | 0.2078        | -    | -         |
| df1833    | 0          | 14.1       | 158  | 0.2259        | 151  | 0.2137        | -    | -         |
| df489     | 0          | 20         | 159  | 0.2274        | 176  | 0.2252        | -    | -         |
| df1235    | 0          | 14.4       | 160  | 0.2281        | 175  | 0.2250        | -    | -         |
| df705     | 0          | 18.7       | 161  | 0.2286        | 178  | 0.2255        | -    | -         |
| df805     | 0          | 16         | 162  | 0.2288        | 156  | 0.2176        | -    | -         |
| df1132    | 0          | 10.4       | 163  | 0.2289        | 145  | 0.2093        | -    | -         |
| df1441    | 0          | 18.1       | 164  | 0.2302        | 160  | 0.2184        | -    | -         |
| df784     | 0          | 18         | 165  | 0.2304        | 167  | 0.2216        | -    | -         |
| df2102    | 0          | 13.3       | 166  | 0.2308        | 159  | 0.2179        | -    | -         |
| df1428    | 0          | 6          | 167  | 0.2312        | 163  | 0.2192        | -    | -         |
| df666     | 0          | 15.3       | 168  | 0.2314        | 186  | 0.2300        | -    | -         |
| df1243    | 0          | 23.8       | 169  | 0.2316        | 162  | 0.2188        | 19   | 0.5192    |
| df1435    | 0          | 19.8       | 170  | 0.2318        | 165  | 0.2206        | -    | -         |
| df102     | 0          | 11.8       | 171  | 0.2320        | 173  | 0.2238        | -    | -         |

continued...

| structure | duplicates | $\Delta H$ | rank | VC-xPWDF (3h) | rank | VC-xPWDF (2m) | rank | autoFIDEL |
|-----------|------------|------------|------|---------------|------|---------------|------|-----------|
| df297     | 0          | 10.8       | 172  | 0.2322        | 172  | 0.2235        | -    | -         |
| df403     | 0          | 14.1       | 173  | 0.2328        | 184  | 0.2296        | -    | -         |
| df1540    | 0          | 2.6        | 174  | 0.2336        | 149  | 0.2114        | -    | -         |
| df325     | 0          | 5.5        | 175  | 0.2338        | 180  | 0.2270        | -    | -         |
| df888     | 0          | 20.2       | 176  | 0.2339        | 185  | 0.2297        | -    | -         |
| df964     | 0          | 12.1       | 177  | 0.2346        | 183  | 0.2293        | -    | -         |
| df2403    | 0          | 4.2        | 178  | 0.2354        | 164  | 0.2199        | -    | -         |
| df472     | 0          | 7.2        | 179  | 0.2356        | 192  | 0.2329        | -    | -         |
| df223     | 0          | 14.4       | 180  | 0.2360        | 187  | 0.2304        | -    | -         |
| df1138    | 0          | 15         | 181  | 0.2364        | 166  | 0.2214        | -    | -         |
| df1999    | 0          | 24.4       | 182  | 0.2370        | 181  | 0.2280        | -    | -         |
| df1968    | 0          | 19.1       | 183  | 0.2376        | 188  | 0.2307        | -    | -         |
| df1455    | 0          | 18.7       | 184  | 0.2385        | 174  | 0.2245        | -    | -         |
| df1562    | 0          | 21.1       | 185  | 0.2388        | 161  | 0.2186        | -    | -         |
| df381     | 0          | 11.1       | 186  | 0.2405        | 182  | 0.2285        | -    | -         |
| df2404    | 2          | 10.9       | 187  | 0.2407        | 157  | 0.2178        | -    | -         |
| df1340    | 0          | 11         | 188  | 0.2408        | 171  | 0.2231        | -    | -         |
| df1332    | 0          | 20.9       | 189  | 0.2411        | 193  | 0.2332        | -    | -         |
| df61      | 0          | 12         | 190  | 0.2414        | 191  | 0.2327        | -    | -         |
| df2420    | 0          | 22.2       | 191  | 0.2429        | 219  | 0.2503        | -    | -         |
| df1780    | 0          | 25.8       | 192  | 0.2432        | 194  | 0.2359        | -    | -         |
| df177     | 0          | 9.5        | 193  | 0.2442        | 195  | 0.2376        | -    | -         |
| df2409    | 0          | 11         | 194  | 0.2445        | 177  | 0.2255        | -    | -         |
| df2680    | 0          | 21.4       | 195  | 0.2446        | 201  | 0.2396        | -    | -         |
| df122     | 0          | 7          | 196  | 0.2476        | 189  | 0.2310        | -    | -         |
| df1506    | 0          | 20.9       | 197  | 0.2481        | 200  | 0.2395        | -    | -         |
| df117     | 0          | 11.5       | 198  | 0.2511        | 198  | 0.2387        | -    | -         |
| df854     | 0          | 13.7       | 199  | 0.2515        | 206  | 0.2428        | -    | -         |
| df668     | 0          | 18.4       | 200  | 0.2523        | 196  | 0.2377        | -    | -         |
| UREAXX33  | -          | -          | 201  | 0.2528        | 203  | 0.2414        | -    | -         |
| df2145    | 0          | 0.8        | 202  | 0.2530        | 197  | 0.2387        | -    | -         |
| df1504    | 0          | 10         | 203  | 0.2539        | 190  | 0.2322        | -    | -         |
| df2363    | 0          | 1.2        | 204  | 0.2552        | 208  | 0.2439        | -    | -         |
| df1104    | 0          | 22.3       | 205  | 0.2552        | 225  | 0.2540        | -    | -         |
| df1202    | 0          | 21.2       | 206  | 0.2560        | 199  | 0.2388        | -    | -         |
| df1960    | 0          | 2.6        | 207  | 0.2568        | 202  | 0.2398        | -    | -         |
| df946     | 0          | 16.8       | 208  | 0.2569        | 220  | 0.2506        | -    | -         |
| df1894    | 0          | 24.5       | 209  | 0.2570        | 204  | 0.2416        | -    | -         |
| df1160    | 0          | 12.9       | 210  | 0.2573        | 205  | 0.2419        | -    | -         |
| df1328    | 0          | 10.1       | 211  | 0.2576        | 209  | 0.2439        | -    | -         |
| df2190    | 0          | 20.2       | 212  | 0.2578        | 207  | 0.2433        | -    | -         |
| df1346    | 0          | 20.2       | 213  | 0.2591        | 211  | 0.2449        | -    | -         |
| df1361    | 0          | 21.3       | 214  | 0.2597        | 212  | 0.2453        | -    | -         |
| df374     | 0          | 0          | 215  | 0.2609        | 214  | 0.2473        | -    | -         |

continued...

| structure | duplicates | $\Delta H$ | rank | VC-xPWDF (3h) | rank | VC-xPWDF (2m) | rank | autoFIDEL |
|-----------|------------|------------|------|---------------|------|---------------|------|-----------|
| df1922    | 0          | 13.8       | 216  | 0.2615        | 222  | 0.2528        | -    | -         |
| df1072    | 0          | 23.6       | 217  | 0.2619        | 215  | 0.2484        | -    | -         |
| df2591    | 0          | 11.8       | 218  | 0.2622        | 210  | 0.2440        | -    | -         |
| df245     | 0          | 11.2       | 219  | 0.2627        | 217  | 0.2499        | -    | -         |
| df417     | 0          | 12.7       | 220  | 0.2630        | 229  | 0.2581        | -    | -         |
| df2075    | 0          | 17.7       | 221  | 0.2650        | 218  | 0.2501        | -    | -         |
| df567     | 0          | 16.6       | 222  | 0.2650        | 213  | 0.2466        | -    | -         |
| df2235    | 0          | 14.8       | 223  | 0.2653        | 228  | 0.2579        | -    | -         |
| df1070    | 0          | 19.1       | 224  | 0.2694        | 221  | 0.2518        | -    | -         |
| df2325    | 0          | 9.6        | 225  | 0.2699        | 230  | 0.2585        | -    | -         |
| df1220    | 0          | 19.9       | 226  | 0.2725        | 216  | 0.2485        | -    | -         |
| df1768    | 0          | 23.4       | 227  | 0.2729        | 227  | 0.2574        | -    | -         |
| df2295    | 0          | 21.8       | 228  | 0.2738        | 226  | 0.2545        | -    | -         |
| df103     | 0          | 12.4       | 229  | 0.2742        | 238  | 0.2680        | -    | -         |
| df200     | 0          | 16.7       | 230  | 0.2750        | 232  | 0.2611        | -    | -         |
| df577     | 0          | 10.4       | 231  | 0.2763        | 223  | 0.2532        | -    | -         |
| df821     | 0          | 16         | 232  | 0.2767        | 224  | 0.2539        | -    | -         |
| df1873    | 0          | 5.7        | 233  | 0.2773        | 233  | 0.2621        | -    | -         |
| df1936    | 0          | 22.7       | 234  | 0.2783        | 235  | 0.2655        | -    | -         |
| df242     | 0          | 0          | 235  | 0.2783        | 231  | 0.2608        | -    | -         |
| df2391    | 0          | 20         | 236  | 0.2798        | 236  | 0.2659        | -    | -         |
| df1144    | 0          | 15.5       | 237  | 0.2799        | 241  | 0.2699        | -    | -         |
| df1929    | 0          | 14.2       | 238  | 0.2805        | 243  | 0.2720        | -    | -         |
| df1611    | 0          | 21         | 239  | 0.2839        | 237  | 0.2667        | -    | -         |
| df550     | 0          | 17.4       | 240  | 0.2843        | 240  | 0.2693        | -    | -         |
| df1189    | 0          | 10.6       | 241  | 0.2846        | 234  | 0.2639        | -    | -         |
| df2222    | 0          | 12.2       | 242  | 0.2847        | 239  | 0.2688        | -    | -         |
| df218     | 0          | 10.6       | 243  | 0.2888        | 244  | 0.2760        | -    | -         |
| df1049    | 0          | 21.6       | 244  | 0.2900        | 245  | 0.2767        | 11   | 0.4062    |
| df2489    | 0          | 25.3       | 245  | 0.2903        | 247  | 0.2798        | -    | -         |
| df205     | 0          | 10.5       | 246  | 0.2909        | 242  | 0.2706        | -    | -         |
| df2449    | 0          | 9.6        | 247  | 0.2913        | 250  | 0.2812        | -    | -         |
| df518     | 0          | 12.9       | 248  | 0.2919        | 246  | 0.2794        | -    | -         |
| df2069    | 0          | 19.9       | 249  | 0.2940        | 256  | 0.2867        | -    | -         |
| df1554    | 0          | 18.4       | 250  | 0.2958        | 252  | 0.2842        | -    | -         |
| df145     | 0          | 16         | 251  | 0.2968        | 248  | 0.2799        | -    | -         |
| df925     | 0          | 9.6        | 252  | 0.2976        | 249  | 0.2806        | -    | -         |
| df16      | 0          | 7.3        | 253  | 0.3011        | 251  | 0.2837        | -    | -         |
| df1437    | 0          | 22.5       | 254  | 0.3019        | 257  | 0.2874        | -    | -         |
| df609     | 0          | 9.1        | 255  | 0.3020        | 261  | 0.2933        | -    | -         |
| df965     | 0          | 12.2       | 256  | 0.3022        | 255  | 0.2863        | -    | -         |
| df492     | 0          | 18.1       | 257  | 0.3029        | 263  | 0.2940        | -    | -         |
| df1245    | 0          | 15.9       | 258  | 0.3057        | 269  | 0.2990        | -    | -         |
| df1573    | 0          | 5.9        | 259  | 0.3066        | 260  | 0.2923        | -    | -         |

continued...

| structure | duplicates | $\Delta H$ | rank | VC-xPWDF (3h) | rank | VC-xPWDF (2m) | rank | autoFIDEL |
|-----------|------------|------------|------|---------------|------|---------------|------|-----------|
| df638     | 0          | 7.9        | 260  | 0.3072        | 258  | 0.2903        | -    | -         |
| df1725    | 0          | 22.5       | 261  | 0.3076        | 254  | 0.2862        | -    | -         |
| df690     | 0          | 9.6        | 262  | 0.3087        | 264  | 0.2945        | -    | -         |
| df2123    | 0          | 27.7       | 263  | 0.3091        | 253  | 0.2849        | -    | -         |
| df631     | 0          | 16.1       | 264  | 0.3091        | 262  | 0.2936        | -    | -         |
| df2083    | 0          | 12.1       | 265  | 0.3098        | 265  | 0.2956        | -    | -         |
| df1857    | 0          | 21.4       | 266  | 0.3105        | 274  | 0.3042        | -    | -         |
| df98      | 0          | 6.6        | 267  | 0.3114        | 271  | 0.3002        | -    | -         |
| df2173    | 0          | 20.1       | 268  | 0.3122        | 259  | 0.2923        | -    | -         |
| df123     | 0          | 11.2       | 269  | 0.3122        | 270  | 0.2999        | -    | -         |
| df1880    | 0          | 22.8       | 270  | 0.3135        | 266  | 0.2956        | -    | -         |
| df436     | 0          | 14.9       | 271  | 0.3168        | 277  | 0.3068        | -    | -         |
| df1556    | 0          | 15.5       | 272  | 0.3174        | 267  | 0.2961        | -    | -         |
| df2620    | 0          | 21.4       | 273  | 0.3179        | 273  | 0.3018        | -    | -         |
| df1981    | 0          | 23.5       | 274  | 0.3184        | 283  | 0.3108        | -    | -         |
| df1593    | 0          | 19.5       | 275  | 0.3201        | 268  | 0.2976        | -    | -         |
| df261     | 0          | 11.3       | 276  | 0.3202        | 281  | 0.3100        | 18   | 0.4955    |
| df104     | 0          | 4.6        | 277  | 0.3215        | 279  | 0.3084        | -    | -         |
| df174     | 0          | 14.7       | 278  | 0.3224        | 276  | 0.3066        | -    | -         |
| df1861    | 0          | 21.7       | 279  | 0.3241        | 290  | 0.3156        | -    | -         |
| df2423    | 0          | 19.4       | 280  | 0.3247        | 275  | 0.3064        | -    | -         |
| df2425    | 0          | 23.9       | 281  | 0.3248        | 278  | 0.3082        | -    | -         |
| df1325    | 0          | 5.3        | 282  | 0.3262        | 289  | 0.3152        | -    | -         |
| df51      | 0          | 10.8       | 283  | 0.3262        | 272  | 0.3013        | -    | -         |
| df885     | 0          | 20.8       | 284  | 0.3263        | 288  | 0.3150        | -    | -         |
| df278     | 0          | 17.6       | 285  | 0.3289        | 286  | 0.3125        | -    | -         |
| df670     | 0          | 13.3       | 286  | 0.3291        | 292  | 0.3169        | -    | -         |
| df63      | 0          | 6.3        | 287  | 0.3291        | 282  | 0.3101        | -    | -         |
| df1244    | 0          | 11         | 288  | 0.3302        | 296  | 0.3191        | -    | -         |
| df994     | 0          | 14         | 289  | 0.3322        | 287  | 0.3126        | 16   | 0.4830    |
| df2682    | 0          | 18.3       | 290  | 0.3327        | 306  | 0.3269        | -    | -         |
| df837     | 0          | 9.5        | 291  | 0.3333        | 285  | 0.3123        | -    | -         |
| df596     | 0          | 19.5       | 292  | 0.3338        | 280  | 0.3099        | 9    | 0.3839    |
| df2015    | 0          | 1.8        | 293  | 0.3350        | 297  | 0.3201        | -    | -         |
| df653     | 0          | 15.8       | 294  | 0.3353        | 291  | 0.3168        | -    | -         |
| df568     | 0          | 11.3       | 295  | 0.3357        | 311  | 0.3290        | -    | -         |
| df804     | 0          | 1.6        | 296  | 0.3360        | 302  | 0.3242        | -    | -         |
| df718     | 0          | 14.6       | 297  | 0.3372        | 298  | 0.3203        | -    | -         |
| df2384    | 0          | 26.6       | 298  | 0.3386        | 314  | 0.3315        | -    | -         |
| df849     | 0          | 0.5        | 299  | 0.3391        | 295  | 0.3189        | -    | -         |
| df844     | 0          | 18         | 300  | 0.3392        | 299  | 0.3219        | -    | -         |
| df1746    | 0          | 15.3       | 301  | 0.3393        | 284  | 0.3121        | -    | -         |
| df909     | 0          | 20         | 302  | 0.3410        | 293  | 0.3173        | -    | -         |
| df1165    | 0          | 14.8       | 303  | 0.3417        | 301  | 0.3233        | -    | -         |

continued...

| structure | duplicates | $\Delta H$ | rank | VC-xPWDF (3h) | rank | VC-xPWDF (2m) | rank | autoFIDEL |
|-----------|------------|------------|------|---------------|------|---------------|------|-----------|
| df1473    | 0          | 20.6       | 304  | 0.3421        | 294  | 0.3184        | -    | -         |
| df1892    | 0          | 27.4       | 305  | 0.3429        | 300  | 0.3223        | -    | -         |
| df2043    | 0          | 12.3       | 306  | 0.3431        | 303  | 0.3250        | -    | -         |
| df1948    | 0          | 24.6       | 307  | 0.3434        | 315  | 0.3373        | -    | -         |
| df221     | 0          | 8.3        | 308  | 0.3435        | 305  | 0.3264        | -    | -         |
| df1796    | 0          | 17.3       | 309  | 0.3437        | 309  | 0.3282        | -    | -         |
| df2379    | 0          | 27.6       | 310  | 0.3439        | 307  | 0.3275        | -    | -         |
| df787     | 0          | 15.1       | 311  | 0.3441        | 304  | 0.3259        | -    | -         |
| df1904    | 0          | 21.7       | 312  | 0.3459        | 312  | 0.3298        | -    | -         |
| df2407    | 1          | 12         | 313  | 0.3459        | 310  | 0.3283        | -    | -         |
| df482     | 0          | 18.3       | 314  | 0.3483        | 317  | 0.3433        | -    | -         |
| df650     | 0          | 5          | 315  | 0.3538        | 313  | 0.3300        | -    | -         |
| df147     | 0          | 6.9        | 316  | 0.3543        | 308  | 0.3276        | -    | -         |
| df531     | 0          | 15.8       | 317  | 0.3646        | 319  | 0.3457        | -    | -         |
| df708     | 0          | 18.6       | 318  | 0.3675        | 321  | 0.3493        | -    | -         |
| df508     | 0          | 16.6       | 319  | 0.3675        | 318  | 0.3446        | -    | -         |
| df290     | 0          | 11.8       | 320  | 0.3681        | 323  | 0.3521        | -    | -         |
| df652     | 0          | 12         | 321  | 0.3687        | 325  | 0.3528        | -    | -         |
| df717     | 0          | 19.5       | 322  | 0.3701        | 326  | 0.3532        | -    | -         |
| df1536    | 0          | 17.3       | 323  | 0.3707        | 320  | 0.3491        | -    | -         |
| df2590    | 0          | 11.8       | 324  | 0.3716        | 316  | 0.3429        | -    | -         |
| df657     | 0          | 13.4       | 325  | 0.3722        | 329  | 0.3609        | -    | -         |
| df495     | 0          | 16.4       | 326  | 0.3770        | 341  | 0.3718        | -    | -         |
| df373     | 0          | 16.3       | 327  | 0.3779        | 322  | 0.3513        | -    | -         |
| df2036    | 0          | 13.2       | 328  | 0.3789        | 328  | 0.3566        | 15   | 0.4815    |
| df1618    | 0          | 22.9       | 329  | 0.3807        | 324  | 0.3524        | -    | -         |
| df2319    | 0          | 18.8       | 330  | 0.3808        | 342  | 0.3729        | -    | -         |
| df1527    | 0          | 5.3        | 331  | 0.3809        | 332  | 0.3648        | -    | -         |
| df1249    | 0          | 18.8       | 332  | 0.3810        | 330  | 0.3629        | -    | -         |
| df2405    | 0          | 5.9        | 333  | 0.3826        | 333  | 0.3651        | -    | -         |
| df49      | 0          | 7.6        | 334  | 0.3830        | 331  | 0.3634        | -    | -         |
| df284     | 0          | 13.3       | 335  | 0.3848        | 327  | 0.3549        | -    | -         |
| df1568    | 0          | 10.3       | 336  | 0.3848        | 340  | 0.3706        | -    | -         |
| df300     | 0          | 16.1       | 337  | 0.3864        | 337  | 0.3686        | -    | -         |
| df1017    | 0          | 16         | 338  | 0.3864        | 338  | 0.3699        | -    | -         |
| df273     | 0          | 2.8        | 339  | 0.3867        | 339  | 0.3700        | -    | -         |
| df2454    | 0          | 29.5       | 340  | 0.3872        | 334  | 0.3652        | -    | -         |
| df115     | 0          | 6.8        | 341  | 0.3874        | 335  | 0.3660        | -    | -         |
| df165     | 0          | 2.5        | 342  | 0.3959        | 336  | 0.3662        | -    | -         |
| df1831    | 0          | 7.7        | 343  | 0.3965        | 344  | 0.3765        | -    | -         |
| df1319    | 0          | 24         | 344  | 0.3978        | 348  | 0.3791        | -    | -         |
| df384     | 0          | 11.1       | 345  | 0.3987        | 347  | 0.3786        | -    | -         |
| df2174    | 0          | 24         | 346  | 0.3995        | 349  | 0.3802        | -    | -         |
| df2445    | 0          | 27.1       | 347  | 0.4005        | 359  | 0.3966        | -    | -         |

continued...

| structure | duplicates | $\Delta H$ | rank | VC-xPWDF (3h) | rank | VC-xPWDF (2m) | rank | autoFIDEL |
|-----------|------------|------------|------|---------------|------|---------------|------|-----------|
| df871     | 0          | 9.2        | 348  | 0.4006        | 350  | 0.3818        | -    | -         |
| df2491    | 0          | 18.9       | 349  | 0.4007        | 345  | 0.3766        | -    | -         |
| df730     | 0          | 8.9        | 350  | 0.4020        | 361  | 0.3982        | -    | -         |
| df2143    | 0          | 16.8       | 351  | 0.4024        | 343  | 0.3762        | -    | -         |
| df1184    | 0          | 19.7       | 352  | 0.4052        | 358  | 0.3932        | -    | -         |
| df2685    | 0          | 13.7       | 353  | 0.4056        | 346  | 0.3775        | -    | -         |
| df742     | 0          | 14.8       | 354  | 0.4063        | 353  | 0.3874        | -    | -         |
| df100     | 0          | 3.8        | 355  | 0.4076        | 354  | 0.3898        | -    | -         |
| df2073    | 0          | 23.6       | 356  | 0.4086        | 351  | 0.3830        | 6    | 0.3437    |
| df1042    | 0          | 21.1       | 357  | 0.4090        | 357  | 0.3919        | -    | -         |
| df1844    | 0          | 13.8       | 358  | 0.4095        | 352  | 0.3860        | -    | -         |
| df1950    | 0          | 25.6       | 359  | 0.4166        | 356  | 0.3914        | -    | -         |
| df2148    | 0          | 26         | 360  | 0.4178        | 368  | 0.4053        | -    | -         |
| df2260    | 0          | 28         | 361  | 0.4180        | 364  | 0.4012        | -    | -         |
| df1246    | 0          | 21.9       | 362  | 0.4185        | 375  | 0.4254        | -    | -         |
| df288     | 0          | 11.3       | 363  | 0.4200        | 360  | 0.3980        | 7    | 0.3577    |
| df796     | 0          | 17.3       | 364  | 0.4204        | 363  | 0.4003        | -    | -         |
| df2223    | 0          | 10.7       | 365  | 0.4206        | 367  | 0.4039        | -    | -         |
| df2595    | 0          | 10.4       | 366  | 0.4210        | 355  | 0.3911        | -    | -         |
| df976     | 0          | 8.8        | 367  | 0.4216        | 366  | 0.4019        | -    | -         |
| df1871    | 0          | 13.6       | 368  | 0.4216        | 362  | 0.3990        | -    | -         |
| df1884    | 0          | 15.4       | 369  | 0.4270        | 370  | 0.4146        | -    | -         |
| df1233    | 0          | 15.2       | 370  | 0.4283        | 369  | 0.4078        | -    | -         |
| df1425    | 0          | 12.1       | 371  | 0.4285        | 365  | 0.4019        | -    | -         |
| df445     | 0          | 3.5        | 372  | 0.4293        | 374  | 0.4243        | -    | -         |
| df645     | 0          | 3          | 373  | 0.4303        | 376  | 0.4269        | -    | -         |
| df2678    | 0          | 25.2       | 374  | 0.4324        | 380  | 0.4305        | -    | -         |
| df2438    | 0          | 27.6       | 375  | 0.4340        | 371  | 0.4195        | -    | -         |
| df791     | 0          | 20.1       | 376  | 0.4390        | 384  | 0.4346        | -    | -         |
| df2455    | 0          | 10.7       | 377  | 0.4413        | 378  | 0.4295        | -    | -         |
| df2677    | 0          | 30.2       | 378  | 0.4432        | 381  | 0.4334        | -    | -         |
| df546     | 0          | 15.9       | 379  | 0.4440        | 377  | 0.4273        | -    | -         |
| df368     | 0          | 15.1       | 380  | 0.4447        | 372  | 0.4199        | -    | -         |
| df275     | 0          | 4.9        | 381  | 0.4465        | 382  | 0.4338        | -    | -         |
| df1035    | 0          | 21.5       | 382  | 0.4466        | 373  | 0.4216        | -    | -         |
| df1983    | 0          | 22.4       | 383  | 0.4533        | 379  | 0.4302        | -    | -         |
| df82      | 0          | 6.9        | 384  | 0.4598        | 383  | 0.4341        | -    | -         |
| df1024    | 0          | 18.7       | 385  | 0.4602        | 386  | 0.4406        | -    | -         |
| df1756    | 0          | 16.1       | 386  | 0.4620        | 393  | 0.4487        | -    | -         |
| df1179    | 0          | 9.6        | 387  | 0.4634        | 391  | 0.4461        | -    | -         |
| df2388    | 0          | 17.9       | 388  | 0.4637        | 394  | 0.4491        | -    | -         |
| df933     | 0          | 10.4       | 389  | 0.4651        | 387  | 0.4423        | -    | -         |
| df1947    | 0          | 17.3       | 390  | 0.4658        | 388  | 0.4425        | -    | -         |
| df855     | 0          | 19.8       | 391  | 0.4665        | 385  | 0.4382        | -    | -         |

continued...



| structure | duplicates | $\Delta H$ | rank | VC-xPWDF (3h) | rank | VC-xPWDF (2m) | rank | autoFIDEL |
|-----------|------------|------------|------|---------------|------|---------------|------|-----------|
| df857     | 0          | 19.3       | 392  | 0.4712        | 395  | 0.4503        | -    | -         |
| df1192    | 0          | 19.1       | 393  | 0.4712        | 389  | 0.4449        | -    | -         |
| df1430    | 0          | 20.7       | 394  | 0.4735        | 390  | 0.4456        | -    | -         |
| df2492    | 0          | 29.1       | 395  | 0.4745        | 392  | 0.4485        | -    | -         |
| df1146    | 0          | 24.2       | 396  | 0.4752        | 397  | 0.4587        | -    | -         |
| df2006    | 0          | 13         | 397  | 0.4769        | 396  | 0.4574        | -    | -         |
| df1732    | 0          | 22.5       | 398  | 0.4772        | 399  | 0.4602        | -    | -         |
| df1351    | 0          | 21.5       | 399  | 0.4776        | 400  | 0.4608        | -    | -         |
| df1259    | 0          | 22.9       | 400  | 0.4815        | 401  | 0.4610        | -    | -         |
| df2297    | 0          | 13.9       | 401  | 0.4851        | 406  | 0.4658        | -    | -         |
| df1535    | 0          | 24.5       | 402  | 0.4861        | 407  | 0.4665        | -    | -         |
| df1881    | 0          | 18.2       | 403  | 0.4867        | 398  | 0.4589        | -    | -         |
| df727     | 0          | 14.2       | 404  | 0.4869        | 403  | 0.4623        | -    | -         |
| df2412    | 0          | 18.6       | 405  | 0.4874        | 404  | 0.4634        | -    | -         |
| df321     | 0          | 10.3       | 406  | 0.4887        | 408  | 0.4675        | -    | -         |
| df247     | 0          | 15.4       | 407  | 0.4888        | 405  | 0.4651        | -    | -         |
| df1006    | 0          | 25.7       | 408  | 0.4908        | 410  | 0.4728        | -    | -         |
| df899     | 0          | 2          | 409  | 0.4931        | 402  | 0.4618        | -    | -         |
| df2117    | 0          | 21.4       | 410  | 0.4943        | 413  | 0.4747        | -    | -         |
| df2441    | 0          | 25.6       | 411  | 0.4947        | 418  | 0.4819        | -    | -         |
| df2077    | 0          | 24.8       | 412  | 0.4955        | 420  | 0.4828        | -    | -         |
| df1046    | 0          | 21.4       | 413  | 0.4962        | 409  | 0.4697        | -    | -         |
| df258     | 0          | 14.1       | 414  | 0.4973        | 429  | 0.4928        | -    | -         |
| df1488    | 0          | 12.1       | 415  | 0.4976        | 415  | 0.4778        | -    | -         |
| df1845    | 0          | 20.4       | 416  | 0.4998        | 411  | 0.4741        | -    | -         |
| df206     | 0          | 9.8        | 417  | 0.5004        | 412  | 0.4744        | -    | -         |
| df2381    | 0          | 26.5       | 418  | 0.5004        | 422  | 0.4843        | -    | -         |
| df1570    | 0          | 21.2       | 419  | 0.5032        | 419  | 0.4823        | -    | -         |
| df662     | 0          | 13         | 420  | 0.5036        | 425  | 0.4872        | -    | -         |
| df2029    | 0          | 22.7       | 421  | 0.5067        | 417  | 0.4815        | -    | -         |
| df529     | 0          | 17.1       | 422  | 0.5079        | 421  | 0.4828        | -    | -         |
| df1018    | 0          | 21.1       | 423  | 0.5101        | 416  | 0.4803        | -    | -         |
| df547     | 0          | 17.2       | 424  | 0.5103        | 426  | 0.4890        | -    | -         |
| df2298    | 0          | 16.7       | 425  | 0.5112        | 414  | 0.4749        | -    | -         |
| df836     | 0          | 2.5        | 426  | 0.5135        | 424  | 0.4870        | -    | -         |
| df1876    | 1          | 15.3       | 427  | 0.5144        | 428  | 0.4900        | -    | -         |
| df2257    | 0          | 20         | 428  | 0.5156        | 423  | 0.4867        | -    | -         |
| df1124    | 0          | 13.6       | 429  | 0.5170        | 435  | 0.4953        | -    | -         |
| df2599    | 0          | 16.2       | 430  | 0.5173        | 431  | 0.4935        | -    | -         |
| df248     | 0          | 13.6       | 431  | 0.5175        | 446  | 0.5082        | -    | -         |
| df1258    | 0          | 18         | 432  | 0.5179        | 434  | 0.4949        | -    | -         |
| df1429    | 0          | 26.2       | 433  | 0.5186        | 432  | 0.4942        | -    | -         |
| df2430    | 0          | 27.4       | 434  | 0.5189        | 433  | 0.4945        | -    | -         |
| df1913    | 0          | 17.6       | 435  | 0.5197        | 430  | 0.4933        | -    | -         |

continued...

| structure | duplicates | $\Delta H$ | rank | VC-xPWDF (3h) | rank | VC-xPWDF (2m) | rank | autoFIDEL |
|-----------|------------|------------|------|---------------|------|---------------|------|-----------|
| df823     | 0          | 16.6       | 436  | 0.5222        | 440  | 0.5018        | -    | -         |
| df998     | 0          | 10.7       | 437  | 0.5223        | 436  | 0.4973        | -    | -         |
| df2507    | 0          | 2.3        | 438  | 0.5225        | 447  | 0.5085        | -    | -         |
| df1365    | 0          | 24.4       | 439  | 0.5228        | 438  | 0.5006        | -    | -         |
| df1500    | 0          | 13.2       | 440  | 0.5242        | 439  | 0.5007        | -    | -         |
| df2684    | 0          | 22.1       | 441  | 0.5243        | 437  | 0.4995        | -    | -         |
| df347     | 0          | 11.2       | 442  | 0.5264        | 427  | 0.4899        | -    | -         |
| df1955    | 0          | 7.3        | 443  | 0.5266        | 450  | 0.5130        | -    | -         |
| df2444    | 0          | 8.2        | 444  | 0.5270        | 441  | 0.5058        | -    | -         |
| df2198    | 0          | 21.4       | 445  | 0.5290        | 445  | 0.5080        | -    | -         |
| df2617    | 0          | 13         | 446  | 0.5317        | 448  | 0.5095        | -    | -         |
| df768     | 0          | 11.9       | 447  | 0.5321        | 449  | 0.5103        | -    | -         |
| df1120    | 0          | 22.7       | 448  | 0.5339        | 443  | 0.5076        | -    | -         |
| df2252    | 0          | 22.5       | 449  | 0.5358        | 455  | 0.5172        | -    | -         |
| df1163    | 0          | 18.3       | 450  | 0.5365        | 444  | 0.5078        | -    | -         |
| df1354    | 0          | 20.7       | 451  | 0.5367        | 454  | 0.5165        | -    | -         |
| df1204    | 0          | 24         | 452  | 0.5371        | 452  | 0.5159        | -    | -         |
| df914     | 0          | 9.4        | 453  | 0.5404        | 451  | 0.5134        | -    | -         |
| df1427    | 0          | 24.9       | 454  | 0.5410        | 458  | 0.5215        | -    | -         |
| df2166    | 0          | 19.6       | 455  | 0.5428        | 457  | 0.5184        | -    | -         |
| df1991    | 0          | 17.8       | 456  | 0.5428        | 459  | 0.5259        | -    | -         |
| df1457    | 0          | 22.9       | 457  | 0.5429        | 453  | 0.5165        | -    | -         |
| df1775    | 0          | 15.1       | 458  | 0.5479        | 456  | 0.5173        | -    | -         |
| df2587    | 0          | 22.3       | 459  | 0.5480        | 461  | 0.5283        | -    | -         |
| df1518    | 0          | 25.7       | 460  | 0.5492        | 442  | 0.5073        | -    | -         |
| df2101    | 0          | 24.8       | 461  | 0.5500        | 465  | 0.5337        | -    | -         |
| df2500    | 0          | 14.1       | 462  | 0.5510        | 462  | 0.5286        | -    | -         |
| df929     | 0          | 12.4       | 463  | 0.5512        | 463  | 0.5313        | -    | -         |
| df814     | 0          | 15.3       | 464  | 0.5520        | 471  | 0.5402        | -    | -         |
| df1298    | 0          | 22.7       | 465  | 0.5530        | 460  | 0.5277        | -    | -         |
| df970     | 0          | 22         | 466  | 0.5539        | 467  | 0.5343        | -    | -         |
| df2046    | 0          | 16.1       | 467  | 0.5539        | 469  | 0.5381        | -    | -         |
| df603     | 0          | 7.9        | 468  | 0.5545        | 468  | 0.5347        | -    | -         |
| df684     | 0          | 11.5       | 469  | 0.5553        | 477  | 0.5454        | -    | -         |
| df215     | 0          | 10.7       | 470  | 0.5554        | 474  | 0.5435        | -    | -         |
| df1174    | 0          | 20.2       | 471  | 0.5582        | 464  | 0.5322        | -    | -         |
| df1883    | 0          | 22.6       | 472  | 0.5594        | 476  | 0.5447        | -    | -         |
| df1098    | 0          | 18.1       | 473  | 0.5613        | 472  | 0.5418        | -    | -         |
| df34      | 0          | 6.1        | 474  | 0.5625        | 473  | 0.5421        | -    | -         |
| df1910    | 0          | 17         | 475  | 0.5628        | 466  | 0.5339        | -    | -         |
| df2638    | 0          | 28.1       | 476  | 0.5654        | 482  | 0.5555        | -    | -         |
| df1903    | 0          | 21.9       | 477  | 0.5666        | 470  | 0.5400        | -    | -         |
| df2602    | 0          | 28.3       | 478  | 0.5732        | 480  | 0.5527        | -    | -         |
| df388     | 0          | 10.1       | 479  | 0.5740        | 475  | 0.5439        | -    | -         |

continued...

| structure | duplicates | $\Delta H$ | rank | VC-xPWDF (3h) | rank | VC-xPWDF (2m) | rank | autoFIDEL |
|-----------|------------|------------|------|---------------|------|---------------|------|-----------|
| df2428    | 0          | 23.5       | 480  | 0.5744        | 478  | 0.5490        | -    | -         |
| df1044    | 0          | 19.9       | 481  | 0.5779        | 479  | 0.5513        | -    | -         |
| df1203    | 0          | 18.8       | 482  | 0.5796        | 481  | 0.5533        | -    | -         |
| df1735    | 0          | 26.7       | 483  | 0.5810        | 487  | 0.5603        | -    | -         |
| df935     | 0          | 12.9       | 484  | 0.5814        | 483  | 0.5557        | -    | -         |
| df1511    | 0          | 24.4       | 485  | 0.5834        | 488  | 0.5605        | -    | -         |
| df562     | 0          | 10.3       | 486  | 0.5879        | 484  | 0.5583        | -    | -         |
| df1134    | 0          | 14         | 487  | 0.5880        | 485  | 0.5585        | -    | -         |
| df1869    | 0          | 21.6       | 488  | 0.5881        | 486  | 0.5603        | -    | -         |
| df2254    | 0          | 27.8       | 489  | 0.5887        | 500  | 0.5718        | -    | -         |
| df453     | 0          | 14.1       | 490  | 0.5897        | 495  | 0.5679        | -    | -         |
| df2496    | 0          | 26         | 491  | 0.5899        | 501  | 0.5718        | -    | -         |
| df2255    | 0          | 24.1       | 492  | 0.5904        | 498  | 0.5706        | -    | -         |
| df1888    | 0          | 19.1       | 493  | 0.5904        | 497  | 0.5694        | -    | -         |
| df565     | 0          | 16.7       | 494  | 0.5909        | 490  | 0.5636        | 10   | 0.3869    |
| df1230    | 0          | 17.3       | 495  | 0.5910        | 491  | 0.5637        | -    | -         |
| df1530    | 0          | 23.2       | 496  | 0.5922        | 494  | 0.5679        | -    | -         |
| df2392    | 0          | 19.8       | 497  | 0.5928        | 489  | 0.5631        | -    | -         |
| df1928    | 0          | 18.9       | 498  | 0.5933        | 512  | 0.5871        | -    | -         |
| df629     | 0          | 19.5       | 499  | 0.5936        | 511  | 0.5859        | -    | -         |
| df2251    | 0          | 14.3       | 500  | 0.5953        | 492  | 0.5658        | -    | -         |
| df1745    | 0          | 21.4       | 501  | 0.5973        | 506  | 0.5808        | -    | -         |
| df2019    | 0          | 22.7       | 502  | 0.5975        | 503  | 0.5765        | -    | -         |
| df435     | 0          | 14         | 503  | 0.6012        | 505  | 0.5808        | -    | -         |
| df1863    | 0          | 22.3       | 504  | 0.6026        | 499  | 0.5718        | -    | -         |
| df2368    | 0          | 12         | 505  | 0.6026        | 496  | 0.5680        | -    | -         |
| df1578    | 0          | 23.3       | 506  | 0.6037        | 508  | 0.5834        | 21   | 0.6875    |
| df296     | 0          | 11.4       | 507  | 0.6073        | 493  | 0.5678        | -    | -         |
| df1779    | 0          | 27.6       | 508  | 0.6081        | 507  | 0.5825        | -    | -         |
| df1972    | 0          | 25.1       | 509  | 0.6085        | 513  | 0.5878        | -    | -         |
| df1855    | 0          | 25.2       | 510  | 0.6087        | 504  | 0.5792        | -    | -         |
| df1872    | 0          | 25.6       | 511  | 0.6101        | 510  | 0.5852        | -    | -         |
| df408     | 0          | 8.2        | 512  | 0.6128        | 502  | 0.5729        | -    | -         |
| df2533    | 0          | 26.2       | 513  | 0.6157        | 523  | 0.5977        | -    | -         |
| df793     | 0          | 21         | 514  | 0.6185        | 521  | 0.5961        | -    | -         |
| df2024    | 0          | 13         | 515  | 0.6187        | 514  | 0.5887        | -    | -         |
| df1907    | 0          | 23.5       | 516  | 0.6187        | 520  | 0.5944        | -    | -         |
| df915     | 0          | 15.7       | 517  | 0.6191        | 530  | 0.6033        | -    | -         |
| df46      | 0          | 10.6       | 518  | 0.6193        | 526  | 0.5988        | -    | -         |
| df1912    | 0          | 23.8       | 519  | 0.6199        | 522  | 0.5961        | -    | -         |
| df1154    | 0          | 18.4       | 520  | 0.6214        | 519  | 0.5922        | -    | -         |
| df1208    | 0          | 19.1       | 521  | 0.6215        | 515  | 0.5897        | -    | -         |
| df1019    | 0          | 16.6       | 522  | 0.6218        | 517  | 0.5903        | -    | -         |
| df1031    | 0          | 22.3       | 523  | 0.6226        | 509  | 0.5834        | -    | -         |

continued...

| structure | duplicates | $\Delta H$ | rank | VC-xPWDF (3h) | rank | VC-xPWDF (2m) | rank | autoFIDEL |
|-----------|------------|------------|------|---------------|------|---------------|------|-----------|
| df1499    | 0          | 20.4       | 524  | 0.6244        | 525  | 0.5987        | -    | -         |
| df2176    | 0          | 17.1       | 525  | 0.6251        | 516  | 0.5898        | -    | -         |
| df1338    | 0          | 15.6       | 526  | 0.6260        | 518  | 0.5921        | -    | -         |
| df1744    | 0          | 16.7       | 527  | 0.6268        | 528  | 0.6003        | -    | -         |
| df2681    | 0          | 10.3       | 528  | 0.6281        | 529  | 0.6012        | -    | -         |
| df2387    | 0          | 28.8       | 529  | 0.6290        | 538  | 0.6125        | -    | -         |
| df1251    | 0          | 19.3       | 530  | 0.6295        | 527  | 0.5995        | -    | -         |
| df1357    | 0          | 12.6       | 531  | 0.6304        | 531  | 0.6039        | -    | -         |
| df848     | 0          | 17.3       | 532  | 0.6309        | 532  | 0.6049        | -    | -         |
| df2243    | 0          | 19.2       | 533  | 0.6337        | 524  | 0.5980        | -    | -         |
| df1521    | 0          | 15.4       | 534  | 0.6346        | 534  | 0.6068        | -    | -         |
| df535     | 0          | 19.5       | 535  | 0.6349        | 537  | 0.6096        | -    | -         |
| df2700    | 0          | 20.5       | 536  | 0.6351        | 533  | 0.6054        | -    | -         |
| df1460    | 0          | 16.3       | 537  | 0.6365        | 547  | 0.6225        | -    | -         |
| df1781    | 0          | 21         | 538  | 0.6368        | 535  | 0.6071        | -    | -         |
| df751     | 0          | 15.4       | 539  | 0.6386        | 541  | 0.6145        | -    | -         |
| df1327    | 0          | 14.6       | 540  | 0.6394        | 545  | 0.6196        | -    | -         |
| df211     | 0          | 15.7       | 541  | 0.6394        | 543  | 0.6175        | -    | -         |
| df1336    | 0          | 16.5       | 542  | 0.6412        | 546  | 0.6220        | -    | -         |
| df726     | 0          | 17.8       | 543  | 0.6414        | 542  | 0.6146        | -    | -         |
| df2119    | 0          | 24.5       | 544  | 0.6423        | 536  | 0.6093        | -    | -         |
| df2011    | 0          | 22.2       | 545  | 0.6441        | 551  | 0.6266        | -    | -         |
| df1170    | 0          | 15.9       | 546  | 0.6461        | 540  | 0.6144        | -    | -         |
| df494     | 0          | 12.1       | 547  | 0.6470        | 544  | 0.6175        | -    | -         |
| df2386    | 0          | 9.3        | 548  | 0.6497        | 550  | 0.6253        | -    | -         |
| df1736    | 0          | 12.1       | 549  | 0.6498        | 539  | 0.6128        | -    | -         |
| df2652    | 0          | 26.2       | 550  | 0.6501        | 556  | 0.6328        | -    | -         |
| df387     | 0          | 12.9       | 551  | 0.6518        | 549  | 0.6251        | -    | -         |
| df1206    | 0          | 14.4       | 552  | 0.6540        | 552  | 0.6294        | -    | -         |
| df1547    | 0          | 17         | 553  | 0.6551        | 557  | 0.6342        | -    | -         |
| df2488    | 0          | 24.3       | 554  | 0.6555        | 567  | 0.6404        | -    | -         |
| df589     | 0          | 9.1        | 555  | 0.6558        | 561  | 0.6369        | -    | -         |
| df643     | 0          | 14.1       | 556  | 0.6560        | 553  | 0.6299        | -    | -         |
| df1801    | 0          | 11.2       | 557  | 0.6564        | 548  | 0.6238        | -    | -         |
| df2067    | 0          | 25.6       | 558  | 0.6601        | 559  | 0.6347        | -    | -         |
| df1963    | 0          | 23.6       | 559  | 0.6601        | 563  | 0.6392        | 8    | 0.3749    |
| df1821    | 0          | 20.8       | 560  | 0.6615        | 560  | 0.6349        | -    | -         |
| df209     | 0          | 15.7       | 561  | 0.6619        | 562  | 0.6383        | -    | -         |
| df802     | 0          | 10.7       | 562  | 0.6621        | 565  | 0.6398        | -    | -         |
| df1949    | 0          | 23.3       | 563  | 0.6623        | 555  | 0.6326        | -    | -         |
| df1030    | 0          | 13.5       | 564  | 0.6629        | 566  | 0.6399        | -    | -         |
| df1446    | 1          | 14         | 565  | 0.6631        | 570  | 0.6418        | -    | -         |
| df1452    | 1          | 19.1       | 566  | 0.6640        | 571  | 0.6426        | -    | -         |
| df1537    | 0          | 20.6       | 567  | 0.6660        | 558  | 0.6343        | -    | -         |

continued...

| structure | duplicates | $\Delta H$ | rank | VC-xPWDF (3h) | rank | VC-xPWDF (2m) | rank | autoFIDEL |
|-----------|------------|------------|------|---------------|------|---------------|------|-----------|
| df1155    | 0          | 14         | 568  | 0.6671        | 569  | 0.6416        | -    | -         |
| df1112    | 0          | 16.8       | 569  | 0.6680        | 568  | 0.6406        | -    | -         |
| df1217    | 0          | 17.8       | 570  | 0.6685        | 564  | 0.6393        | -    | -         |
| df1326    | 0          | 9.2        | 571  | 0.6691        | 589  | 0.6619        | -    | -         |
| df345     | 0          | 15.3       | 572  | 0.6694        | 574  | 0.6445        | -    | -         |
| df1234    | 0          | 12.5       | 573  | 0.6697        | 554  | 0.6304        | -    | -         |
| df1758    | 0          | 23.1       | 574  | 0.6709        | 573  | 0.6438        | -    | -         |
| df1610    | 0          | 21.9       | 575  | 0.6716        | 579  | 0.6502        | -    | -         |
| df1905    | 0          | 19.7       | 576  | 0.6732        | 580  | 0.6507        | -    | -         |
| df1045    | 0          | 17.6       | 577  | 0.6734        | 572  | 0.6437        | -    | -         |
| df1770    | 0          | 24.9       | 578  | 0.6738        | 576  | 0.6464        | -    | -         |
| df1545    | 0          | 21.4       | 579  | 0.6740        | 583  | 0.6562        | -    | -         |
| df749     | 0          | 20.8       | 580  | 0.6745        | 575  | 0.6450        | -    | -         |
| df2200    | 0          | 26.3       | 581  | 0.6749        | 582  | 0.6516        | -    | -         |
| df780     | 0          | 17         | 582  | 0.6755        | 578  | 0.6489        | -    | -         |
| df1295    | 0          | 24.2       | 583  | 0.6760        | 581  | 0.6515        | -    | -         |
| df883     | 0          | 12.7       | 584  | 0.6781        | 577  | 0.6479        | 13   | 0.4320    |
| df1613    | 0          | 20         | 585  | 0.6798        | 586  | 0.6576        | -    | -         |
| df541     | 0          | 15.5       | 586  | 0.6810        | 585  | 0.6574        | -    | -         |
| df265     | 0          | 16.1       | 587  | 0.6823        | 587  | 0.6578        | -    | -         |
| df2506    | 0          | 27         | 588  | 0.6833        | 591  | 0.6633        | -    | -         |
| df361     | 0          | 17.2       | 589  | 0.6844        | 584  | 0.6568        | -    | -         |
| df1786    | 0          | 20.5       | 590  | 0.6870        | 590  | 0.6626        | -    | -         |
| df2616    | 0          | 24.1       | 591  | 0.6872        | 593  | 0.6655        | -    | -         |
| df1012    | 0          | 15.7       | 592  | 0.6876        | 592  | 0.6647        | -    | -         |
| df30      | 0          | 11.1       | 593  | 0.6883        | 608  | 0.6752        | -    | -         |
| df1986    | 0          | 20.1       | 594  | 0.6903        | 600  | 0.6707        | -    | -         |
| df597     | 1          | 18.2       | 595  | 0.6904        | 596  | 0.6677        | -    | -         |
| df1909    | 0          | 26.4       | 596  | 0.6907        | 598  | 0.6702        | -    | -         |
| df1069    | 0          | 12.5       | 597  | 0.6908        | 595  | 0.6671        | -    | -         |
| df1474    | 0          | 17.4       | 598  | 0.6911        | 597  | 0.6690        | -    | -         |
| df282     | 0          | 16         | 599  | 0.6937        | 594  | 0.6660        | -    | -         |
| df939     | 0          | 9.4        | 600  | 0.6941        | 588  | 0.6611        | -    | -         |
| df316     | 0          | 14.3       | 601  | 0.6961        | 601  | 0.6718        | -    | -         |
| df1156    | 0          | 18.4       | 602  | 0.6979        | 599  | 0.6706        | -    | -         |
| df1253    | 0          | 14.8       | 603  | 0.6989        | 609  | 0.6754        | -    | -         |
| df754     | 0          | 13.9       | 604  | 0.6996        | 606  | 0.6737        | -    | -         |
| df1923    | 0          | 18         | 605  | 0.6997        | 602  | 0.6722        | -    | -         |
| df1197    | 0          | 16.6       | 606  | 0.6998        | 603  | 0.6723        | -    | -         |
| df2697    | 0          | 26.4       | 607  | 0.7010        | 610  | 0.6776        | -    | -         |
| df986     | 0          | 14.7       | 608  | 0.7021        | 607  | 0.6749        | -    | -         |
| df1964    | 0          | 26.2       | 609  | 0.7067        | 605  | 0.6736        | -    | -         |
| df1815    | 0          | 22.2       | 610  | 0.7080        | 612  | 0.6820        | -    | -         |
| df2167    | 0          | 28         | 611  | 0.7089        | 614  | 0.6829        | -    | -         |

continued...

| structure | duplicates | $\Delta H$ | rank | VC-xPWDF (3h) | rank | VC-xPWDF (2m) | rank | autoFIDEL |
|-----------|------------|------------|------|---------------|------|---------------|------|-----------|
| df636     | 0          | 15.2       | 612  | 0.7098        | 611  | 0.6800        | -    | -         |
| df865     | 0          | 12.4       | 613  | 0.7104        | 619  | 0.6877        | -    | -         |
| df1369    | 0          | 17.3       | 614  | 0.7115        | 617  | 0.6847        | -    | -         |
| df192     | 0          | 14.9       | 615  | 0.7116        | 630  | 0.6976        | -    | -         |
| df1178    | 0          | 22.5       | 616  | 0.7117        | 615  | 0.6840        | -    | -         |
| df429     | 0          | 15.2       | 617  | 0.7123        | 618  | 0.6850        | -    | -         |
| df1952    | 0          | 23.9       | 618  | 0.7132        | 613  | 0.6825        | -    | -         |
| df1171    | 0          | 14         | 619  | 0.7135        | 604  | 0.6728        | -    | -         |
| df1557    | 0          | 23.8       | 620  | 0.7140        | 620  | 0.6878        | -    | -         |
| df1738    | 0          | 21         | 621  | 0.7143        | 621  | 0.6901        | -    | -         |
| df1439    | 0          | 12.2       | 622  | 0.7158        | 616  | 0.6844        | -    | -         |
| df1148    | 0          | 21.1       | 623  | 0.7160        | 627  | 0.6956        | -    | -         |
| df703     | 0          | 17         | 624  | 0.7183        | 623  | 0.6913        | -    | -         |
| df816     | 0          | 13.7       | 625  | 0.7185        | 626  | 0.6953        | -    | -         |
| df771     | 0          | 10.7       | 626  | 0.7194        | 628  | 0.6968        | -    | -         |
| df307     | 0          | 13.6       | 627  | 0.7223        | 622  | 0.6904        | -    | -         |
| df1822    | 0          | 18.9       | 628  | 0.7231        | 625  | 0.6939        | -    | -         |
| df2603    | 0          | 20.6       | 629  | 0.7238        | 631  | 0.6992        | -    | -         |
| df1895    | 0          | 23.9       | 630  | 0.7258        | 632  | 0.6994        | -    | -         |
| df2007    | 0          | 24.1       | 631  | 0.7261        | 624  | 0.6927        | -    | -         |
| df1240    | 0          | 22         | 632  | 0.7276        | 629  | 0.6969        | -    | -         |
| df1491    | 0          | 14.2       | 633  | 0.7310        | 634  | 0.7039        | -    | -         |
| df858     | 0          | 15.4       | 634  | 0.7314        | 636  | 0.7054        | -    | -         |
| df1860    | 0          | 18.6       | 635  | 0.7317        | 638  | 0.7072        | 12   | 0.4144    |
| df755     | 0          | 21.1       | 636  | 0.7320        | 642  | 0.7088        | -    | -         |
| df466     | 0          | 16.5       | 637  | 0.7327        | 646  | 0.7136        | -    | -         |
| df176     | 0          | 14.4       | 638  | 0.7330        | 655  | 0.7196        | -    | -         |
| df593     | 0          | 16.3       | 639  | 0.7333        | 639  | 0.7079        | -    | -         |
| df2414    | 1          | 24.4       | 640  | 0.7354        | 649  | 0.7157        | -    | -         |
| df1102    | 0          | 19.5       | 641  | 0.7362        | 640  | 0.7081        | -    | -         |
| df1010    | 0          | 17.3       | 642  | 0.7366        | 645  | 0.7118        | -    | -         |
| df2030    | 0          | 16.6       | 643  | 0.7391        | 637  | 0.7071        | -    | -         |
| df1899    | 0          | 21.1       | 644  | 0.7396        | 647  | 0.7136        | -    | -         |
| df533     | 0          | 9.9        | 645  | 0.7397        | 648  | 0.7140        | -    | -         |
| df1447    | 0          | 23.5       | 646  | 0.7400        | 644  | 0.7111        | -    | -         |
| df2061    | 0          | 29.2       | 647  | 0.7404        | 661  | 0.7252        | -    | -         |
| df651     | 0          | 18.2       | 648  | 0.7405        | 654  | 0.7179        | -    | -         |
| df2268    | 0          | 16.7       | 649  | 0.7408        | 656  | 0.7209        | -    | -         |
| df1672    | 0          | 26.7       | 650  | 0.7432        | 650  | 0.7163        | -    | -         |
| df479     | 0          | 13.1       | 651  | 0.7440        | 635  | 0.7051        | -    | -         |
| df728     | 0          | 20.9       | 652  | 0.7441        | 651  | 0.7168        | -    | -         |
| df2129    | 0          | 17.7       | 653  | 0.7441        | 657  | 0.7210        | -    | -         |
| df700     | 0          | 13.9       | 654  | 0.7449        | 643  | 0.7093        | -    | -         |
| df1862    | 0          | 23.3       | 655  | 0.7468        | 659  | 0.7223        | -    | -         |

continued...

| structure | duplicates | $\Delta H$ | rank | VC-xPWDF (3h) | rank | VC-xPWDF (2m) | rank | autoFIDEL |
|-----------|------------|------------|------|---------------|------|---------------|------|-----------|
| df1495    | 0          | 11.7       | 656  | 0.7470        | 663  | 0.7264        | -    | -         |
| df1139    | 0          | 20.8       | 657  | 0.7471        | 633  | 0.7026        | -    | -         |
| df1175    | 0          | 14.9       | 658  | 0.7481        | 653  | 0.7176        | -    | -         |
| df637     | 0          | 12.5       | 659  | 0.7490        | 652  | 0.7174        | -    | -         |
| df615     | 0          | 19.5       | 660  | 0.7491        | 660  | 0.7250        | -    | -         |
| df2084    | 0          | 26.4       | 661  | 0.7500        | 665  | 0.7302        | -    | -         |
| df551     | 0          | 12.9       | 662  | 0.7520        | 641  | 0.7088        | -    | -         |
| df971     | 0          | 13         | 663  | 0.7526        | 666  | 0.7307        | -    | -         |
| df2619    | 0          | 30.2       | 664  | 0.7526        | 658  | 0.7223        | -    | -         |
| df1125    | 0          | 15.9       | 665  | 0.7550        | 662  | 0.7259        | -    | -         |
| df959     | 0          | 20.4       | 666  | 0.7590        | 672  | 0.7405        | -    | -         |
| df549     | 0          | 18.9       | 667  | 0.7607        | 667  | 0.7353        | -    | -         |
| df2081    | 0          | 17         | 668  | 0.7616        | 671  | 0.7386        | -    | -         |
| df499     | 0          | 9.3        | 669  | 0.7617        | 664  | 0.7289        | -    | -         |
| df534     | 0          | 13.3       | 670  | 0.7633        | 673  | 0.7408        | -    | -         |
| df956     | 0          | 21.9       | 671  | 0.7651        | 670  | 0.7380        | -    | -         |
| df1431    | 0          | 22.9       | 672  | 0.7663        | 668  | 0.7378        | -    | -         |
| df2426    | 0          | 24.3       | 673  | 0.7667        | 675  | 0.7447        | -    | -         |
| df720     | 0          | 20.4       | 674  | 0.7682        | 674  | 0.7421        | -    | -         |
| df1804    | 0          | 27.2       | 675  | 0.7703        | 676  | 0.7448        | -    | -         |
| df1797    | 0          | 16.1       | 676  | 0.7739        | 678  | 0.7463        | -    | -         |
| df2060    | 0          | 19         | 677  | 0.7746        | 669  | 0.7378        | -    | -         |
| df1616    | 0          | 15.3       | 678  | 0.7756        | 679  | 0.7471        | -    | -         |
| df822     | 0          | 15.7       | 679  | 0.7765        | 680  | 0.7484        | -    | -         |
| df1524    | 0          | 15.2       | 680  | 0.7789        | 683  | 0.7548        | -    | -         |
| df1214    | 0          | 20.1       | 681  | 0.7812        | 681  | 0.7504        | -    | -         |
| df2686    | 0          | 24.6       | 682  | 0.7815        | 687  | 0.7591        | -    | -         |
| df1140    | 0          | 10.6       | 683  | 0.7825        | 690  | 0.7619        | -    | -         |
| df2457    | 0          | 15.9       | 684  | 0.7833        | 691  | 0.7630        | -    | -         |
| df913     | 0          | 17.5       | 685  | 0.7834        | 677  | 0.7454        | -    | -         |
| df1856    | 0          | 13.2       | 686  | 0.7848        | 682  | 0.7547        | -    | -         |
| df146     | 0          | 10         | 687  | 0.7858        | 686  | 0.7590        | -    | -         |
| df1115    | 0          | 19.4       | 688  | 0.7868        | 700  | 0.7692        | -    | -         |
| df573     | 0          | 15.4       | 689  | 0.7914        | 698  | 0.7683        | -    | -         |
| df583     | 0          | 14         | 690  | 0.7917        | 684  | 0.7549        | -    | -         |
| df1730    | 0          | 22.3       | 691  | 0.7922        | 704  | 0.7712        | -    | -         |
| df584     | 0          | 16         | 692  | 0.7922        | 697  | 0.7682        | -    | -         |
| df797     | 0          | 12.9       | 693  | 0.7927        | 706  | 0.7733        | -    | -         |
| df1238    | 0          | 19.3       | 694  | 0.7930        | 693  | 0.7646        | -    | -         |
| df906     | 0          | 20.1       | 695  | 0.7930        | 702  | 0.7696        | -    | -         |
| df1522    | 0          | 24.6       | 696  | 0.7940        | 688  | 0.7599        | -    | -         |
| df1594    | 0          | 18.3       | 697  | 0.7944        | 699  | 0.7691        | -    | -         |
| df1389    | 0          | 14.4       | 698  | 0.7952        | 696  | 0.7676        | -    | -         |
| df44      | 0          | 11.2       | 699  | 0.7973        | 705  | 0.7725        | -    | -         |

continued...

| structure | duplicates | $\Delta H$ | rank | VC-xPWDF (3h) | rank | VC-xPWDF (2m) | rank | autoFIDEL |
|-----------|------------|------------|------|---------------|------|---------------|------|-----------|
| df2698    | 0          | 26.2       | 700  | 0.7980        | 695  | 0.7676        | -    | -         |
| df1615    | 0          | 17.5       | 701  | 0.7992        | 689  | 0.7602        | -    | -         |
| df799     | 0          | 16.7       | 702  | 0.7998        | 701  | 0.7693        | -    | -         |
| df478     | 0          | 12.1       | 703  | 0.8012        | 685  | 0.7577        | -    | -         |
| df512     | 0          | 17.6       | 704  | 0.8033        | 709  | 0.7788        | -    | -         |
| df1211    | 0          | 23.8       | 705  | 0.8037        | 703  | 0.7707        | -    | -         |
| df1513    | 0          | 20.4       | 706  | 0.8050        | 710  | 0.7789        | -    | -         |
| df1916    | 0          | 22         | 707  | 0.8053        | 708  | 0.7786        | -    | -         |
| df882     | 0          | 20.4       | 708  | 0.8058        | 719  | 0.7849        | -    | -         |
| df2440    | 0          | 24         | 709  | 0.8060        | 726  | 0.7924        | -    | -         |
| df1740    | 0          | 26.4       | 710  | 0.8062        | 712  | 0.7796        | -    | -         |
| df1037    | 0          | 22.3       | 711  | 0.8066        | 713  | 0.7799        | -    | -         |
| df543     | 0          | 14.6       | 712  | 0.8073        | 718  | 0.7848        | -    | -         |
| df2236    | 0          | 30.4       | 713  | 0.8096        | 714  | 0.7805        | 2    | 0.1313    |
| df1229    | 0          | 19.9       | 714  | 0.8102        | 694  | 0.7663        | -    | -         |
| df1461    | 0          | 9.7        | 715  | 0.8104        | 707  | 0.7784        | -    | -         |
| df1915    | 0          | 23.6       | 716  | 0.8105        | 692  | 0.7645        | -    | -         |
| df564     | 0          | 16.9       | 717  | 0.8108        | 717  | 0.7831        | -    | -         |
| df1239    | 0          | 22.5       | 718  | 0.8109        | 723  | 0.7876        | -    | -         |
| df1423    | 0          | 20.6       | 719  | 0.8114        | 715  | 0.7809        | -    | -         |
| df869     | 0          | 20.8       | 720  | 0.8116        | 731  | 0.7961        | -    | -         |
| df544     | 0          | 16.6       | 721  | 0.8124        | 722  | 0.7867        | -    | -         |
| df2318    | 0          | 23.2       | 722  | 0.8134        | 725  | 0.7914        | -    | -         |
| df1047    | 0          | 12.6       | 723  | 0.8137        | 724  | 0.7895        | -    | -         |
| df2431    | 0          | 18.6       | 724  | 0.8139        | 716  | 0.7831        | 14   | 0.4771    |
| df1223    | 0          | 19.2       | 725  | 0.8149        | 711  | 0.7792        | -    | -         |
| df1748    | 0          | 16.1       | 726  | 0.8151        | 730  | 0.7945        | -    | -         |
| df1318    | 0          | 26.4       | 727  | 0.8180        | 728  | 0.7940        | -    | -         |
| df2162    | 0          | 30.5       | 728  | 0.8181        | 736  | 0.8043        | -    | -         |
| df1889    | 0          | 25.4       | 729  | 0.8191        | 721  | 0.7853        | -    | -         |
| df1975    | 0          | 29.4       | 730  | 0.8201        | 729  | 0.7944        | -    | -         |
| df450     | 0          | 15.1       | 731  | 0.8210        | 720  | 0.7851        | 3    | 0.1762    |
| df2604    | 0          | 25.3       | 732  | 0.8222        | 732  | 0.7986        | -    | -         |
| df763     | 0          | 13.9       | 733  | 0.8245        | 727  | 0.7931        | -    | -         |
| df2327    | 0          | 13.4       | 734  | 0.8251        | 735  | 0.8032        | -    | -         |
| df285     | 0          | 10.1       | 735  | 0.8255        | 733  | 0.8000        | -    | -         |
| df1316    | 0          | 23.9       | 736  | 0.8259        | 744  | 0.8123        | -    | -         |
| df1129    | 0          | 18.4       | 737  | 0.8274        | 734  | 0.8017        | 17   | 0.4944    |
| df740     | 0          | 20.1       | 738  | 0.8288        | 738  | 0.8061        | -    | -         |
| df600     | 0          | 7.6        | 739  | 0.8293        | 737  | 0.8060        | -    | -         |
| df2429    | 0          | 26.5       | 740  | 0.8306        | 745  | 0.8143        | -    | -         |
| df1890    | 0          | 22.5       | 741  | 0.8310        | 740  | 0.8079        | -    | -         |
| df1998    | 0          | 24.4       | 742  | 0.8339        | 743  | 0.8100        | -    | -         |
| df840     | 0          | 20.1       | 743  | 0.8344        | 741  | 0.8092        | -    | -         |

continued...



| structure | duplicates | $\Delta H$ | rank | VC-xPWDF (3h) | rank | VC-xPWDF (2m) | rank | autoFIDEL |
|-----------|------------|------------|------|---------------|------|---------------|------|-----------|
| df1477    | 0          | 12.8       | 744  | 0.8345        | 739  | 0.8075        | -    | -         |
| df2453    | 0          | 21.7       | 745  | 0.8405        | 747  | 0.8147        | -    | -         |
| df219     | 0          | 16         | 746  | 0.8408        | 742  | 0.8097        | -    | -         |
| df1227    | 0          | 23         | 747  | 0.8424        | 746  | 0.8146        | -    | -         |
| df2294    | 0          | 16.3       | 748  | 0.8430        | 750  | 0.8231        | -    | -         |
| df2410    | 0          | 23.8       | 749  | 0.8458        | 753  | 0.8256        | -    | -         |
| df563     | 0          | 15.7       | 750  | 0.8484        | 751  | 0.8235        | -    | -         |
| df1739    | 0          | 10.4       | 751  | 0.8484        | 748  | 0.8174        | -    | -         |
| df2375    | 0          | 25.2       | 752  | 0.8510        | 749  | 0.8216        | -    | -         |
| df675     | 0          | 13.3       | 753  | 0.8536        | 752  | 0.8245        | -    | -         |
| df1958    | 0          | 24         | 754  | 0.8562        | 754  | 0.8276        | -    | -         |
| df960     | 0          | 24.4       | 755  | 0.8565        | 756  | 0.8386        | -    | -         |
| df238     | 0          | 9          | 756  | 0.8590        | 755  | 0.8323        | -    | -         |
| df1722    | 0          | 23.9       | 757  | 0.8652        | 758  | 0.8463        | -    | -         |
| df2435    | 0          | 21.4       | 758  | 0.8659        | 759  | 0.8464        | -    | -         |
| df1323    | 0          | 21.3       | 759  | 0.8667        | 757  | 0.8439        | -    | -         |
| df2269    | 0          | 23         | 760  | 0.8694        | 762  | 0.8531        | -    | -         |
| df721     | 0          | 8.3        | 761  | 0.8709        | 764  | 0.8535        | -    | -         |
| df414     | 0          | 19         | 762  | 0.8720        | 760  | 0.8488        | -    | -         |
| df555     | 0          | 11         | 763  | 0.8734        | 761  | 0.8505        | -    | -         |
| df815     | 0          | 12         | 764  | 0.8759        | 768  | 0.8637        | -    | -         |
| df2673    | 0          | 19.6       | 765  | 0.8784        | 763  | 0.8533        | -    | -         |
| df137     | 0          | 12.4       | 766  | 0.8787        | 765  | 0.8557        | -    | -         |
| df251     | 0          | 16.8       | 767  | 0.8817        | 769  | 0.8681        | -    | -         |
| df462     | 0          | 11.9       | 768  | 0.8832        | 771  | 0.8703        | -    | -         |
| df572     | 0          | 17.7       | 769  | 0.8835        | 766  | 0.8594        | -    | -         |
| df2456    | 0          | 27.8       | 770  | 0.8843        | 770  | 0.8692        | -    | -         |
| df1798    | 0          | 27.7       | 771  | 0.8864        | 767  | 0.8603        | -    | -         |
| df1764    | 0          | 24.1       | 772  | 0.8924        | 772  | 0.8717        | -    | -         |
| df1011    | 0          | 8          | 773  | 0.9058        | 773  | 0.8840        | -    | -         |
| df2071    | 0          | 26.3       | 774  | 0.9059        | 776  | 0.8956        | -    | -         |
| df328     | 0          | 17.2       | 775  | 0.9125        | 775  | 0.8905        | -    | -         |
| df548     | 0          | 13.1       | 776  | 0.9148        | 774  | 0.8896        | -    | -         |
| df1508    | 0          | 19.8       | 777  | 0.9176        | 779  | 0.9047        | -    | -         |
| df2451    | 0          | 24.1       | 778  | 0.9254        | 781  | 0.9055        | -    | -         |
| df1552    | 0          | 30.8       | 779  | 0.9257        | 778  | 0.9046        | -    | -         |
| df2118    | 0          | 13.7       | 780  | 0.9261        | 777  | 0.9041        | -    | -         |
| df1772    | 0          | 19.1       | 781  | 0.9271        | 782  | 0.9061        | -    | -         |
| df2256    | 0          | 17.9       | 782  | 0.9273        | 780  | 0.9051        | -    | -         |
| df1118    | 0          | 24.7       | 783  | 0.9392        | 783  | 0.9237        | -    | -         |

Table S8: Summary of data for 1,4-dicyanobenzene. Relative enthalpy is given in kJ/mol, ranks are according to the next-right column, autoFIDEL comparisons were made with the default program parameters and the experimental powder diffractograms collected over 3 hrs.

| structure | duplicates | $\Delta H$ | rank | VC-xPWDF (3h) | rank | VC-xPWDF (2m) | rank | autoFIDEL |
|-----------|------------|------------|------|---------------|------|---------------|------|-----------|
| TEPNIT04  | -          | -          | 1    | 0.0326        | 1    | 0.0335        | 1    | 0.0934    |
| TEPNIT14  | -          | -          | 2    | 0.0330        | 2    | 0.0339        | -    | -         |
| opt_ca99  | 8          | 0          | 3    | 0.0366        | 3    | 0.0372        | 21   | 0.4462    |
| opt_am133 | 0          | 1.4        | 4    | 0.1165        | 4    | 0.1184        | -    | -         |
| opt_bf110 | 0          | 19.6       | 5    | 0.1261        | 5    | 0.1213        | -    | -         |
| opt_aa88  | 0          | 0.8        | 6    | 0.1418        | 6    | 0.1441        | 3    | 0.2614    |
| opt_ab127 | 0          | 0.8        | 7    | 0.1426        | 8    | 0.1449        | 2    | 0.1849    |
| opt_ca121 | 0          | 0.6        | 8    | 0.1436        | 9    | 0.1459        | 11   | 0.3229    |
| opt_da10  | 3          | 10.2       | 9    | 0.1465        | 7    | 0.1445        | -    | -         |
| opt_db20  | 0          | 0.8        | 10   | 0.1750        | 10   | 0.1710        | 5    | 0.2783    |
| opt_ak55  | 3          | 1.3        | 11   | 0.1920        | 12   | 0.1912        | -    | -         |
| opt_db41  | 0          | 4.4        | 12   | 0.1935        | 11   | 0.1899        | -    | -         |
| opt_av67  | 0          | 1.5        | 13   | 0.2000        | 14   | 0.1997        | -    | -         |
| opt_am100 | 0          | 8.1        | 14   | 0.2011        | 13   | 0.1989        | -    | -         |
| opt_da41  | 0          | 5.5        | 15   | 0.2525        | 15   | 0.2486        | 12   | 0.3384    |
| opt_az131 | 0          | 13.8       | 16   | 0.2590        | 16   | 0.2517        | -    | -         |
| opt_ce4   | 0          | 9          | 17   | 0.2697        | 17   | 0.2700        | -    | -         |
| opt_da58  | 1          | 6.3        | 18   | 0.2800        | 19   | 0.2758        | -    | -         |
| opt_bh86  | 0          | 19.6       | 19   | 0.2810        | 20   | 0.2783        | -    | -         |
| opt_bf97  | 0          | 7          | 20   | 0.2846        | 18   | 0.2745        | -    | -         |
| opt_ai59  | 1          | 2          | 21   | 0.2895        | 21   | 0.2841        | 4    | 0.2691    |
| opt_da28  | 3          | 4.6        | 22   | 0.2896        | 24   | 0.2900        | -    | -         |
| opt_da73  | 0          | 7.5        | 23   | 0.2911        | 23   | 0.2867        | 27   | 0.6377    |
| opt_am152 | 3          | 8          | 24   | 0.2915        | 22   | 0.2846        | -    | -         |
| opt_ak126 | 0          | 9.4        | 25   | 0.3133        | 25   | 0.3073        | -    | -         |
| opt_aq110 | 0          | 10.6       | 26   | 0.3282        | 26   | 0.3174        | -    | -         |
| opt_aq105 | 5          | 1.4        | 27   | 0.3307        | 27   | 0.3238        | -    | -         |
| opt_bd88  | 0          | 6.8        | 28   | 0.3394        | 29   | 0.3381        | -    | -         |
| opt_az102 | 0          | 4.4        | 29   | 0.3397        | 28   | 0.3362        | -    | -         |
| opt_aq142 | 0          | 11.5       | 30   | 0.3516        | 30   | 0.3451        | -    | -         |
| opt_av30  | 0          | 3.5        | 31   | 0.3562        | 31   | 0.3497        | 10   | 0.3098    |
| opt_bd53  | 0          | 12.6       | 32   | 0.3601        | 32   | 0.3568        | -    | -         |
| opt_am126 | 0          | 5.8        | 33   | 0.3681        | 33   | 0.3618        | 26   | 0.4913    |
| opt_al48  | 0          | 2.9        | 34   | 0.3758        | 34   | 0.3699        | 7    | 0.2827    |
| opt_af47  | 0          | 2.8        | 35   | 0.3800        | 35   | 0.3758        | 19   | 0.4254    |
| opt_au50  | 0          | 6.2        | 36   | 0.3872        | 36   | 0.3798        | -    | -         |
| opt_ai128 | 0          | 2.3        | 37   | 0.3896        | 37   | 0.3830        | 20   | 0.4435    |
| opt_ad74  | 1          | 4.8        | 38   | 0.4063        | 38   | 0.3967        | 28   | 0.6572    |
| opt_cc80  | 0          | 4.3        | 39   | 0.4066        | 39   | 0.3969        | -    | -         |
| opt_db32  | 0          | 3.4        | 40   | 0.4145        | 41   | 0.4071        | 18   | 0.4253    |
| opt_au118 | 1          | 4.1        | 41   | 0.4162        | 40   | 0.4066        | 13   | 0.3483    |

continued...

| structure | duplicates | $\Delta H$ | rank | VC-xPWDF (3h) | rank | VC-xPWDF (2m) | rank | autoFIDEL |
|-----------|------------|------------|------|---------------|------|---------------|------|-----------|
| opt_ba61  | 0          | 2.2        | 42   | 0.4215        | 42   | 0.4147        | -    | -         |
| TEPNIT06  | -          | -          | 43   | 0.4339        | 44   | 0.4256        | -    | -         |
| opt_af30  | 0          | 2.7        | 44   | 0.4362        | 45   | 0.4300        | -    | -         |
| opt_aq126 | 0          | 16.3       | 45   | 0.4364        | 43   | 0.4244        | -    | -         |
| opt_au111 | 0          | 10.9       | 46   | 0.4405        | 46   | 0.4312        | 17   | 0.4132    |
| opt_au19  | 0          | 2.1        | 47   | 0.4576        | 50   | 0.4545        | -    | -         |
| opt_am97  | 0          | 9.3        | 48   | 0.4603        | 47   | 0.4504        | -    | -         |
| opt_ak38  | 0          | 2.8        | 49   | 0.4612        | 48   | 0.4522        | 22   | 0.4597    |
| opt_ay126 | 0          | 6.8        | 50   | 0.4616        | 49   | 0.4526        | -    | -         |
| opt_ah34  | 2          | 8.6        | 51   | 0.4675        | 51   | 0.4606        | -    | -         |
| opt_al95  | 0          | 3.2        | 52   | 0.4737        | 52   | 0.4651        | -    | -         |
| opt_ay100 | 0          | 3.3        | 53   | 0.4832        | 53   | 0.4735        | 29   | 0.6767    |
| opt_av96  | 4          | 1.4        | 54   | 0.4858        | 54   | 0.4810        | -    | -         |
| opt_aq116 | 0          | 15.4       | 55   | 0.4972        | 55   | 0.4852        | -    | -         |
| opt_dc32  | 0          | 2.4        | 56   | 0.4989        | 56   | 0.4891        | 6    | 0.2802    |
| opt_ah31  | 1          | 8.7        | 57   | 0.5001        | 57   | 0.4932        | -    | -         |
| opt_ay84  | 0          | 3.6        | 58   | 0.5079        | 58   | 0.4950        | 14   | 0.3506    |
| opt_dc10  | 0          | 0.6        | 59   | 0.5138        | 60   | 0.5044        | 8    | 0.3060    |
| opt_au40  | 2          | 1.6        | 60   | 0.5149        | 61   | 0.5121        | -    | -         |
| opt_aq33  | 0          | 19.1       | 61   | 0.5172        | 59   | 0.5029        | -    | -         |
| opt_az62  | 3          | 1.9        | 62   | 0.5470        | 62   | 0.5333        | 15   | 0.3584    |
| opt_ay129 | 0          | 12.6       | 63   | 0.5483        | 63   | 0.5370        | -    | -         |
| opt_ah53  | 0          | 6.8        | 64   | 0.5537        | 64   | 0.5432        | -    | -         |
| opt_am15  | 0          | 7.3        | 65   | 0.5725        | 66   | 0.5592        | -    | -         |
| opt_ay152 | 0          | 7.3        | 66   | 0.5731        | 65   | 0.5584        | -    | -         |
| opt_cc83  | 0          | 19.4       | 67   | 0.5848        | 67   | 0.5731        | -    | -         |
| opt_cd146 | 0          | 8.4        | 68   | 0.5909        | 69   | 0.5834        | -    | -         |
| opt_ay35  | 1          | 8.6        | 69   | 0.5909        | 68   | 0.5822        | -    | -         |
| opt_am39  | 0          | 18.8       | 70   | 0.5980        | 70   | 0.5834        | -    | -         |
| opt_ad27  | 1          | 3.2        | 71   | 0.6153        | 71   | 0.6045        | -    | -         |
| opt_aj87  | 0          | 8.1        | 72   | 0.6206        | 73   | 0.6177        | -    | -         |
| opt_aj89  | 0          | 8.4        | 73   | 0.6210        | 74   | 0.6180        | -    | -         |
| opt_ay108 | 0          | 13.1       | 74   | 0.6232        | 72   | 0.6139        | -    | -         |
| opt_aj21  | 1          | 8          | 75   | 0.6276        | 76   | 0.6247        | -    | -         |
| opt_ay10  | 4          | 8.9        | 76   | 0.6284        | 75   | 0.6222        | -    | -         |
| opt_au10  | 5          | 9.1        | 77   | 0.6329        | 77   | 0.6273        | -    | -         |
| opt_au88  | 0          | 12.9       | 78   | 0.6634        | 78   | 0.6501        | -    | -         |
| opt_bd37  | 0          | 5.1        | 79   | 0.6771        | 81   | 0.6671        | -    | -         |
| opt_cb111 | 0          | 15.2       | 80   | 0.6779        | 79   | 0.6652        | 25   | 0.4808    |
| opt_aw19  | 0          | 3.1        | 81   | 0.6785        | 80   | 0.6671        | 23   | 0.4654    |
| opt_ak146 | 0          | 14         | 82   | 0.6810        | 83   | 0.6752        | -    | -         |
| opt_cc9   | 0          | 18.1       | 83   | 0.6855        | 82   | 0.6746        | -    | -         |
| opt_cd106 | 3          | 7.7        | 84   | 0.6873        | 84   | 0.6757        | -    | -         |
| opt_cb27  | 1          | 7.8        | 85   | 0.6882        | 85   | 0.6768        | -    | -         |

continued...

| structure | duplicates | $\Delta H$ | rank | VC-xPWDF (3h) | rank | VC-xPWDF (2m) | rank | autoFIDEL |
|-----------|------------|------------|------|---------------|------|---------------|------|-----------|
| opt_cb72  | 0          | 6.9        | 86   | 0.6926        | 86   | 0.6819        | -    | -         |
| opt_aw57  | 0          | 6.6        | 87   | 0.7028        | 87   | 0.6878        | -    | -         |
| opt_bh63  | 0          | 4.9        | 88   | 0.7055        | 88   | 0.6958        | -    | -         |
| opt_cc97  | 0          | 19.3       | 89   | 0.7240        | 89   | 0.7093        | -    | -         |
| opt_af40  | 1          | 8          | 90   | 0.7302        | 90   | 0.7250        | -    | -         |
| opt_am63  | 0          | 4          | 91   | 0.7510        | 91   | 0.7371        | -    | -         |
| opt_cd60  | 0          | 10         | 92   | 0.7555        | 93   | 0.7487        | 24   | 0.4791    |
| opt_cb130 | 0          | 9.9        | 93   | 0.7611        | 92   | 0.7445        | -    | -         |
| opt_aw24  | 2          | 10.8       | 94   | 0.7649        | 94   | 0.7523        | -    | -         |
| opt_ak127 | 0          | 9.4        | 95   | 0.7866        | 95   | 0.7755        | 9    | 0.3069    |
| opt_ak129 | 0          | 6.3        | 96   | 0.7879        | 96   | 0.7769        | 16   | 0.3865    |
| opt_cb123 | 1          | 8.9        | 97   | 0.7986        | 97   | 0.7813        | -    | -         |

Table S9: Summary of data for uracil. Relative enthalpy is given in kJ/mol, ranks are according to the next-right column, autoFIDEL comparisons were made with the default program parameters and the experimental powder diffractograms collected over 3 hrs.

| structure | duplicates | $\Delta H$ | rank | VC-xPWDF (3h) | rank | VC-xPWDF (2m) | rank | autoFIDEL |
|-----------|------------|------------|------|---------------|------|---------------|------|-----------|
| URACIL    | -          | -          | 1    | 0.0290        | 1    | 0.0382        | 1    | 0.1392    |
| opt_am7   | 0          | 1.2        | 2    | 0.0297        | 2    | 0.0391        | -    | -         |
| opt_am82  | 0          | 1.7        | 3    | 0.0358        | 3    | 0.0435        | -    | -         |
| opt_am72  | 0          | 3.2        | 4    | 0.0659        | 4    | 0.0739        | -    | -         |
| opt_aq92  | 0          | 5.5        | 5    | 0.0869        | 5    | 0.0896        | -    | -         |
| opt_ay85  | 0          | 8.8        | 6    | 0.0984        | 7    | 0.1011        | -    | -         |
| opt_am75  | 1          | 3.4        | 7    | 0.1001        | 8    | 0.1013        | -    | -         |
| opt_aw23  | 0          | 6.4        | 8    | 0.1018        | 9    | 0.1035        | -    | -         |
| opt_am103 | 0          | 5.5        | 9    | 0.1052        | 6    | 0.1000        | -    | -         |
| opt_aq5   | 0          | 3.7        | 10   | 0.1090        | 10   | 0.1088        | -    | -         |
| opt_av96  | 0          | 6.9        | 11   | 0.1112        | 11   | 0.1132        | -    | -         |
| opt_av62  | 0          | 4.6        | 12   | 0.1146        | 12   | 0.1138        | -    | -         |
| opt_av23  | 1          | 4.6        | 13   | 0.1154        | 13   | 0.1150        | -    | -         |
| opt_fa88  | 0          | 6.3        | 14   | 0.1177        | 15   | 0.1199        | -    | -         |
| opt_am100 | 0          | 0.1        | 15   | 0.1215        | 21   | 0.1264        | 8    | 0.3053    |
| opt_av85  | 0          | 7.1        | 16   | 0.1222        | 17   | 0.1204        | -    | -         |
| opt_av8   | 0          | 2.8        | 17   | 0.1232        | 19   | 0.1244        | -    | -         |
| opt_am36  | 0          | 0.5        | 18   | 0.1234        | 20   | 0.1246        | -    | -         |
| opt_am67  | 0          | 9          | 19   | 0.1256        | 18   | 0.1215        | -    | -         |
| opt_ap78  | 0          | 3.8        | 20   | 0.1256        | 16   | 0.1200        | -    | -         |
| opt_am1   | 0          | 7.4        | 21   | 0.1256        | 14   | 0.1197        | -    | -         |
| opt_ap38  | 0          | 2.1        | 22   | 0.1273        | 22   | 0.1272        | -    | -         |
| opt_ab40  | 0          | 1.1        | 23   | 0.1304        | 25   | 0.1393        | -    | -         |
| opt_dd16  | 0          | 1.2        | 24   | 0.1358        | 26   | 0.1404        | -    | -         |
| opt_av43  | 0          | 7.5        | 25   | 0.1372        | 23   | 0.1375        | -    | -         |
| opt_dc6   | 0          | 0.8        | 26   | 0.1421        | 29   | 0.1480        | -    | -         |
| opt_av7   | 0          | 7.7        | 27   | 0.1422        | 24   | 0.1382        | -    | -         |
| opt_af76  | 0          | 3          | 28   | 0.1448        | 31   | 0.1514        | 5    | 0.2977    |
| opt_ab72  | 0          | 0.6        | 29   | 0.1449        | 33   | 0.1532        | -    | -         |
| opt_ak27  | 0          | 7.8        | 30   | 0.1475        | 28   | 0.1467        | -    | -         |
| opt_ak9   | 0          | 8          | 31   | 0.1509        | 27   | 0.1450        | -    | -         |
| opt_al57  | 1          | 5.6        | 32   | 0.1524        | 30   | 0.1507        | -    | -         |
| opt_ai43  | 0          | 6.3        | 33   | 0.1534        | 32   | 0.1525        | 44   | 0.5007    |
| opt_av53  | 0          | 8.4        | 34   | 0.1539        | 34   | 0.1534        | -    | -         |
| opt_ad41  | 0          | 2.3        | 35   | 0.1570        | 35   | 0.1591        | 14   | 0.3679    |
| opt_aj1   | 0          | 4.7        | 36   | 0.1620        | 37   | 0.1621        | -    | -         |
| opt_am65  | 0          | 1.7        | 37   | 0.1661        | 40   | 0.1673        | -    | -         |
| opt_aq88  | 0          | 6.6        | 38   | 0.1664        | 38   | 0.1655        | -    | -         |
| opt_ar11  | 0          | 4.1        | 39   | 0.1671        | 36   | 0.1612        | -    | -         |
| opt_ai48  | 0          | 6.9        | 40   | 0.1708        | 41   | 0.1699        | 29   | 0.4091    |
| opt_av32  | 0          | 6.2        | 41   | 0.1724        | 42   | 0.1723        | 27   | 0.4068    |

continued...

| structure | duplicates | $\Delta H$ | rank | VC-xPWDF (3h) | rank | VC-xPWDF (2m) | rank | autoFIDEL |
|-----------|------------|------------|------|---------------|------|---------------|------|-----------|
| opt_av77  | 0          | 8.8        | 42   | 0.1736        | 39   | 0.1665        | -    | -         |
| opt_bj20  | 0          | 5.1        | 43   | 0.1750        | 44   | 0.1779        | -    | -         |
| opt_au19  | 0          | 2.5        | 44   | 0.1811        | 43   | 0.1729        | 47   | 0.5174    |
| opt_af4   | 0          | 8.3        | 45   | 0.1909        | 47   | 0.1899        | 22   | 0.3957    |
| opt_ai81  | 0          | 6.3        | 46   | 0.1916        | 46   | 0.1873        | -    | -         |
| opt_av63  | 0          | 9.4        | 47   | 0.1922        | 45   | 0.1864        | -    | -         |
| opt_db20  | 0          | 6.8        | 48   | 0.1933        | 53   | 0.1986        | -    | -         |
| opt_aq3   | 0          | 6.5        | 49   | 0.1956        | 51   | 0.1930        | -    | -         |
| opt_am28  | 0          | 3.3        | 50   | 0.1959        | 49   | 0.1901        | -    | -         |
| opt_cb64  | 0          | 2.2        | 51   | 0.1969        | 48   | 0.1900        | -    | -         |
| opt_au35  | 0          | 6.3        | 52   | 0.1972        | 50   | 0.1912        | -    | -         |
| opt_af45  | 0          | 5          | 53   | 0.1996        | 52   | 0.1963        | -    | -         |
| opt_af7   | 0          | 4.3        | 54   | 0.2028        | 54   | 0.2014        | 21   | 0.3956    |
| opt_ai61  | 0          | 6.5        | 55   | 0.2084        | 56   | 0.2081        | -    | -         |
| opt_db24  | 0          | 8.3        | 56   | 0.2114        | 55   | 0.2066        | -    | -         |
| opt_ak73  | 0          | 6.2        | 57   | 0.2177        | 57   | 0.2124        | -    | -         |
| opt_ai14  | 0          | 5.2        | 58   | 0.2194        | 58   | 0.2142        | -    | -         |
| opt_de31  | 0          | 6.9        | 59   | 0.2282        | 61   | 0.2227        | -    | -         |
| opt_db58  | 0          | 7          | 60   | 0.2301        | 62   | 0.2235        | -    | -         |
| opt_fc5   | 0          | 4.8        | 61   | 0.2303        | 60   | 0.2217        | -    | -         |
| opt_aq73  | 0          | 4.6        | 62   | 0.2326        | 59   | 0.2208        | 38   | 0.4509    |
| opt_fc35  | 0          | 4.8        | 63   | 0.2346        | 63   | 0.2249        | -    | -         |
| opt_bj4   | 0          | 5.6        | 64   | 0.2346        | 64   | 0.2264        | -    | -         |
| opt_de20  | 0          | 3.8        | 65   | 0.2351        | 65   | 0.2266        | 30   | 0.4136    |
| opt_bh51  | 0          | 6.1        | 66   | 0.2352        | 66   | 0.2288        | -    | -         |
| opt_cc78  | 0          | 9.7        | 67   | 0.2358        | 68   | 0.2365        | 33   | 0.4215    |
| opt_de67  | 0          | 5.1        | 68   | 0.2360        | 67   | 0.2301        | 39   | 0.4617    |
| opt_db50  | 0          | 6.7        | 69   | 0.2459        | 69   | 0.2379        | -    | -         |
| opt_dd4   | 0          | 5.3        | 70   | 0.2488        | 70   | 0.2393        | -    | -         |
| opt_ai89  | 0          | 7.2        | 71   | 0.2492        | 71   | 0.2429        | -    | -         |
| opt_aq9   | 0          | 5.4        | 72   | 0.2516        | 72   | 0.2437        | -    | -         |
| opt_de66  | 0          | 7.9        | 73   | 0.2524        | 75   | 0.2475        | -    | -         |
| opt_ad3   | 0          | 4.4        | 74   | 0.2527        | 73   | 0.2468        | -    | -         |
| opt_ak75  | 0          | 3          | 75   | 0.2571        | 74   | 0.2472        | -    | -         |
| opt_db56  | 0          | 8.4        | 76   | 0.2577        | 76   | 0.2487        | -    | -         |
| opt_av17  | 0          | 1.8        | 77   | 0.2598        | 77   | 0.2499        | -    | -         |
| opt_bd50  | 0          | 6.9        | 78   | 0.2623        | 79   | 0.2519        | 35   | 0.4316    |
| opt_az72  | 0          | 5.5        | 79   | 0.2630        | 80   | 0.2546        | 45   | 0.5086    |
| opt_ai41  | 0          | 3.2        | 80   | 0.2635        | 78   | 0.2512        | -    | -         |
| opt_aw34  | 0          | 7.4        | 81   | 0.2650        | 81   | 0.2570        | -    | -         |
| opt_fa50  | 0          | 2.6        | 82   | 0.2663        | 86   | 0.2701        | 18   | 0.3887    |
| opt_ay13  | 0          | 2.9        | 83   | 0.2706        | 82   | 0.2636        | -    | -         |
| opt_aj60  | 0          | 7.9        | 84   | 0.2724        | 84   | 0.2640        | -    | -         |
| opt_bb55  | 0          | 4.6        | 85   | 0.2758        | 83   | 0.2639        | 24   | 0.4023    |

continued...

| structure | duplicates | $\Delta H$ | rank | VC-xPWDF (3h) | rank | VC-xPWDF (2m) | rank | autoFIDEL |
|-----------|------------|------------|------|---------------|------|---------------|------|-----------|
| opt_ai94  | 0          | 8.5        | 86   | 0.2760        | 85   | 0.2663        | -    | -         |
| opt_aj49  | 0          | 6.9        | 87   | 0.2853        | 87   | 0.2703        | -    | -         |
| opt_cd81  | 0          | 3.7        | 88   | 0.2864        | 93   | 0.2834        | -    | -         |
| opt_az32  | 0          | 7.5        | 89   | 0.2881        | 88   | 0.2761        | -    | -         |
| opt_bd56  | 0          | 4.8        | 90   | 0.2886        | 91   | 0.2821        | 11   | 0.3554    |
| opt_de71  | 0          | 7          | 91   | 0.2895        | 89   | 0.2777        | 48   | 0.5181    |
| opt_de78  | 0          | 8.1        | 92   | 0.2915        | 92   | 0.2824        | -    | -         |
| opt_aj37  | 0          | 6.9        | 93   | 0.2972        | 90   | 0.2813        | -    | -         |
| opt_cd102 | 0          | 4          | 94   | 0.2973        | 99   | 0.2920        | 55   | 0.6004    |
| opt_al19  | 0          | 7.8        | 95   | 0.3009        | 95   | 0.2885        | -    | -         |
| opt_fc51  | 0          | 2.2        | 96   | 0.3011        | 98   | 0.2916        | 3    | 0.2858    |
| opt_bj91  | 0          | 5.9        | 97   | 0.3021        | 97   | 0.2901        | -    | -         |
| opt_al39  | 0          | 6.1        | 98   | 0.3022        | 96   | 0.2898        | -    | -         |
| opt_de39  | 0          | 4          | 99   | 0.3047        | 94   | 0.2862        | -    | -         |
| opt_fa83  | 0          | 6.2        | 100  | 0.3187        | 102  | 0.3117        | -    | -         |
| opt_au27  | 0          | 9.6        | 101  | 0.3191        | 100  | 0.3079        | -    | -         |
| opt_cc89  | 0          | 9          | 102  | 0.3200        | 103  | 0.3129        | 46   | 0.5117    |
| opt_ar70  | 0          | 4.1        | 103  | 0.3232        | 105  | 0.3194        | -    | -         |
| opt_cd66  | 0          | 6.8        | 104  | 0.3237        | 101  | 0.3088        | -    | -         |
| opt_bb20  | 0          | 6          | 105  | 0.3272        | 106  | 0.3199        | -    | -         |
| opt_au23  | 0          | 7.7        | 106  | 0.3283        | 107  | 0.3207        | -    | -         |
| opt_bf65  | 0          | 2.7        | 107  | 0.3295        | 104  | 0.3192        | -    | -         |
| opt_bb38  | 0          | 8.4        | 108  | 0.3297        | 109  | 0.3238        | -    | -         |
| opt_cb66  | 0          | 0.9        | 109  | 0.3307        | 108  | 0.3233        | -    | -         |
| opt_cc93  | 0          | 3.4        | 110  | 0.3415        | 111  | 0.3277        | 52   | 0.5483    |
| opt_bh30  | 0          | 9.5        | 111  | 0.3415        | 112  | 0.3310        | -    | -         |
| opt_fa15  | 0          | 1.9        | 112  | 0.3420        | 113  | 0.3319        | 40   | 0.4724    |
| opt_ai77  | 0          | 7.9        | 113  | 0.3430        | 115  | 0.3335        | 23   | 0.3971    |
| opt_cc34  | 2          | 1.7        | 114  | 0.3466        | 110  | 0.3263        | -    | -         |
| opt_ai64  | 0          | 7.1        | 115  | 0.3466        | 116  | 0.3340        | -    | -         |
| opt_ar25  | 0          | 7.5        | 116  | 0.3473        | 117  | 0.3402        | 51   | 0.5394    |
| opt_de82  | 0          | 4.8        | 117  | 0.3491        | 114  | 0.3329        | -    | -         |
| opt_cc12  | 0          | 6.5        | 118  | 0.3524        | 121  | 0.3444        | 34   | 0.4288    |
| opt_aj68  | 0          | 8.2        | 119  | 0.3527        | 118  | 0.3422        | -    | -         |
| opt_de2   | 0          | 5.9        | 120  | 0.3564        | 120  | 0.3428        | -    | -         |
| opt_dc18  | 0          | 6.1        | 121  | 0.3573        | 119  | 0.3424        | -    | -         |
| opt_aj17  | 0          | 6.8        | 122  | 0.3607        | 122  | 0.3515        | -    | -         |
| opt_az5   | 0          | 6.2        | 123  | 0.3674        | 123  | 0.3584        | 37   | 0.4389    |
| opt_al59  | 0          | 7.4        | 124  | 0.3760        | 125  | 0.3612        | -    | -         |
| opt_aw66  | 0          | 7.4        | 125  | 0.3789        | 128  | 0.3710        | -    | -         |
| opt_bj89  | 0          | 8.6        | 126  | 0.3803        | 127  | 0.3690        | 42   | 0.4790    |
| opt_av40  | 0          | 4.7        | 127  | 0.3805        | 126  | 0.3668        | 54   | 0.5996    |
| opt_dc27  | 0          | 1.8        | 128  | 0.3816        | 124  | 0.3596        | -    | -         |
| opt_cd105 | 0          | 0          | 129  | 0.3830        | 134  | 0.3841        | -    | -         |

continued...

| structure | duplicates | $\Delta H$ | rank | VC-xPWDF (3h) | rank | VC-xPWDF (2m) | rank | autoFIDEL |
|-----------|------------|------------|------|---------------|------|---------------|------|-----------|
| opt_ba38  | 0          | 7.7        | 130  | 0.3854        | 129  | 0.3717        | -    | -         |
| opt_ay10  | 0          | 8.2        | 131  | 0.3915        | 132  | 0.3810        | -    | -         |
| opt_fc42  | 0          | 3.9        | 132  | 0.3926        | 136  | 0.3863        | -    | -         |
| opt_be13  | 0          | 2.9        | 133  | 0.3950        | 133  | 0.3812        | 25   | 0.4031    |
| opt_ai73  | 0          | 8.4        | 134  | 0.3962        | 135  | 0.3859        | -    | -         |
| opt_fc91  | 0          | 1.7        | 135  | 0.3968        | 130  | 0.3798        | 17   | 0.3863    |
| opt_dc64  | 0          | 7.4        | 136  | 0.3980        | 131  | 0.3802        | -    | -         |
| opt_fa29  | 0          | 1.2        | 137  | 0.4021        | 137  | 0.3879        | -    | -         |
| opt_fc82  | 0          | 1.3        | 138  | 0.4082        | 138  | 0.3907        | -    | -         |
| opt_au79  | 0          | 2.1        | 139  | 0.4088        | 139  | 0.3962        | 12   | 0.3567    |
| opt_fa52  | 0          | 8.3        | 140  | 0.4129        | 140  | 0.3992        | -    | -         |
| opt_ca59  | 0          | 0.6        | 141  | 0.4158        | 141  | 0.4034        | -    | -         |
| opt_cb53  | 0          | 4.4        | 142  | 0.4212        | 142  | 0.4105        | -    | -         |
| opt_aj36  | 0          | 6.7        | 143  | 0.4232        | 143  | 0.4131        | -    | -         |
| opt_dc34  | 0          | 9          | 144  | 0.4304        | 145  | 0.4219        | -    | -         |
| opt_ce67  | 0          | 8.9        | 145  | 0.4313        | 147  | 0.4227        | 31   | 0.4157    |
| opt_fa87  | 0          | 4.4        | 146  | 0.4331        | 144  | 0.4176        | -    | -         |
| opt_ak24  | 0          | 6.9        | 147  | 0.4379        | 146  | 0.4222        | 41   | 0.4769    |
| opt_av1   | 0          | 5.5        | 148  | 0.4420        | 150  | 0.4320        | 26   | 0.4059    |
| opt_ai56  | 0          | 8.4        | 149  | 0.4463        | 149  | 0.4293        | 53   | 0.5726    |
| opt_fc47  | 0          | 2.3        | 150  | 0.4468        | 154  | 0.4376        | -    | -         |
| opt_dc53  | 0          | 3.1        | 151  | 0.4483        | 148  | 0.4266        | 28   | 0.4084    |
| opt_cb11  | 0          | 4.2        | 152  | 0.4488        | 152  | 0.4353        | -    | -         |
| opt_aj22  | 0          | 9.3        | 153  | 0.4493        | 151  | 0.4345        | -    | -         |
| opt_ca96  | 0          | 0.3        | 154  | 0.4543        | 153  | 0.4358        | 15   | 0.3712    |
| opt_bh24  | 0          | 4.8        | 155  | 0.4571        | 156  | 0.4448        | -    | -         |
| opt_cd67  | 0          | 9.7        | 156  | 0.4575        | 157  | 0.4533        | 49   | 0.5253    |
| opt_bb19  | 0          | 4.6        | 157  | 0.4578        | 155  | 0.4431        | -    | -         |
| opt_au62  | 0          | 8.6        | 158  | 0.4708        | 161  | 0.4613        | -    | -         |
| opt_dc10  | 1          | 7.2        | 159  | 0.4714        | 158  | 0.4563        | -    | -         |
| opt_al12  | 0          | 6.9        | 160  | 0.4739        | 159  | 0.4581        | -    | -         |
| opt_fc13  | 0          | 7.7        | 161  | 0.4752        | 160  | 0.4601        | -    | -         |
| opt_fa79  | 0          | 5.1        | 162  | 0.4793        | 162  | 0.4677        | -    | -         |
| opt_am81  | 0          | 1.3        | 163  | 0.4793        | 163  | 0.4683        | 13   | 0.3613    |
| opt_fa23  | 0          | 1          | 164  | 0.4854        | 165  | 0.4736        | 9    | 0.3083    |
| opt_cc80  | 0          | 8.6        | 165  | 0.4860        | 164  | 0.4690        | -    | -         |
| opt_cb96  | 0          | 8.2        | 166  | 0.5032        | 167  | 0.4894        | -    | -         |
| opt_aj4   | 0          | 8.5        | 167  | 0.5056        | 168  | 0.4897        | -    | -         |
| opt_ai35  | 0          | 9          | 168  | 0.5097        | 166  | 0.4881        | -    | -         |
| opt_fc27  | 0          | 5.2        | 169  | 0.5104        | 169  | 0.4950        | -    | -         |
| opt_ay96  | 0          | 1.1        | 170  | 0.5144        | 170  | 0.4973        | -    | -         |
| opt_ca17  | 0          | 2.1        | 171  | 0.5155        | 171  | 0.5017        | -    | -         |
| opt_da12  | 0          | 0          | 172  | 0.5169        | 172  | 0.5041        | -    | -         |
| opt_cc19  | 0          | 7.2        | 173  | 0.5208        | 176  | 0.5146        | -    | -         |

continued...



| structure | duplicates | $\Delta H$ | rank | VC-xPWDF (3h) | rank | VC-xPWDF (2m) | rank | autoFIDEL |
|-----------|------------|------------|------|---------------|------|---------------|------|-----------|
| opt_fc60  | 0          | 4.4        | 174  | 0.5233        | 173  | 0.5061        | -    | -         |
| opt_ai58  | 0          | 6.9        | 175  | 0.5263        | 174  | 0.5079        | -    | -         |
| opt_cb100 | 0          | 1.5        | 176  | 0.5265        | 175  | 0.5083        | -    | -         |
| opt_cd11  | 0          | 5.5        | 177  | 0.5326        | 181  | 0.5244        | -    | -         |
| opt_ce29  | 0          | 2.7        | 178  | 0.5338        | 178  | 0.5183        | 32   | 0.4160    |
| opt_ce68  | 0          | 7.8        | 179  | 0.5357        | 177  | 0.5165        | 36   | 0.4363    |
| opt_cc73  | 0          | 7.8        | 180  | 0.5419        | 180  | 0.5239        | -    | -         |
| opt_cc2   | 0          | 3.3        | 181  | 0.5426        | 179  | 0.5224        | -    | -         |
| opt_dd18  | 0          | 7.3        | 182  | 0.5430        | 182  | 0.5272        | -    | -         |
| opt_fc90  | 0          | 4.6        | 183  | 0.5449        | 183  | 0.5276        | 7    | 0.3037    |
| opt_ce45  | 0          | 4.7        | 184  | 0.5453        | 184  | 0.5299        | 56   | 0.6270    |
| opt_ai87  | 0          | 9.4        | 185  | 0.5483        | 187  | 0.5408        | -    | -         |
| opt_ay84  | 0          | 5.5        | 186  | 0.5500        | 186  | 0.5355        | -    | -         |
| opt_da104 | 0          | 3.4        | 187  | 0.5538        | 185  | 0.5352        | -    | -         |
| opt_fc79  | 0          | 4.8        | 188  | 0.5543        | 188  | 0.5441        | 10   | 0.3428    |
| opt_cd1   | 0          | 2.1        | 189  | 0.5547        | 189  | 0.5482        | 50   | 0.5391    |
| opt_ai97  | 0          | 5.5        | 190  | 0.5701        | 190  | 0.5541        | -    | -         |
| opt_cd7   | 0          | 1.7        | 191  | 0.5843        | 192  | 0.5779        | -    | -         |
| opt_dc88  | 0          | 9.5        | 192  | 0.5875        | 191  | 0.5739        | -    | -         |
| opt_cd78  | 0          | 5.5        | 193  | 0.5950        | 194  | 0.5878        | -    | -         |
| opt_cc37  | 0          | 9.2        | 194  | 0.6039        | 193  | 0.5842        | -    | -         |
| opt_ab44  | 0          | 2.2        | 195  | 0.6221        | 195  | 0.6046        | 19   | 0.3917    |
| opt_cb99  | 0          | 0.8        | 196  | 0.6249        | 196  | 0.6137        | 43   | 0.4822    |
| opt_ar60  | 0          | 8.2        | 197  | 0.6297        | 197  | 0.6165        | -    | -         |
| opt_am2   | 0          | 0.8        | 198  | 0.6373        | 198  | 0.6195        | -    | -         |
| opt_cb1   | 0          | 6.3        | 199  | 0.6416        | 199  | 0.6336        | -    | -         |
| opt_am10  | 0          | 0.7        | 200  | 0.6640        | 200  | 0.6473        | -    | -         |
| opt_dd49  | 0          | 1.6        | 201  | 0.6963        | 201  | 0.6755        | -    | -         |
| opt_dd87  | 0          | 3.7        | 202  | 0.7018        | 202  | 0.6818        | -    | -         |
| opt_cd86  | 0          | 3.6        | 203  | 0.7497        | 203  | 0.7344        | 16   | 0.3839    |
| opt_aj30  | 0          | 3.1        | 204  | 0.7868        | 204  | 0.7652        | -    | -         |
| opt_ak38  | 0          | 0.8        | 205  | 0.8108        | 205  | 0.7938        | -    | -         |
| opt_ak15  | 0          | 3.8        | 206  | 0.8238        | 206  | 0.8076        | 6    | 0.3011    |
| opt_ak45  | 0          | 2.6        | 207  | 0.8384        | 207  | 0.8190        | 4    | 0.2970    |
| opt_ak44  | 0          | 2.9        | 208  | 0.8450        | 208  | 0.8307        | 20   | 0.3922    |
| opt_de95  | 0          | 1.1        | 209  | 0.8482        | 209  | 0.8336        | -    | -         |
| opt_ak16  | 0          | 4.6        | 210  | 0.8595        | 212  | 0.8468        | 2    | 0.2356    |
| opt_ai46  | 0          | 0          | 211  | 0.8603        | 210  | 0.8409        | -    | -         |
| opt_aj39  | 0          | 0.7        | 212  | 0.8612        | 211  | 0.8414        | -    | -         |

Table S10: Summary of data for caffeine. Relative enthalpy is given in kJ/mol, ranks are according to the next-right column, autoFIDEL comparisons were made with the default program parameters and the experimental powder diffractograms collected over 3 hrs.

| structure | duplicates | $\Delta H$ | rank | VC-xPWDF (3h) | rank | VC-xPWDF (2m) | rank | autoFIDEL |
|-----------|------------|------------|------|---------------|------|---------------|------|-----------|
| NIWFEE03  | -          | -          | 1    | 0.0114        | 1    | 0.0128        | 1    | 0.0601    |
| dfA44     | 0          | 7.5        | 2    | 0.0220        | 2    | 0.0249        | 5    | 0.1255    |
| dfA149    | 0          | 6.7        | 3    | 0.0241        | 3    | 0.0264        | -    | -         |
| dfA73     | 0          | 0.5        | 4    | 0.0267        | 4    | 0.0293        | -    | -         |
| dfA39     | 0          | 11.2       | 5    | 0.0347        | 6    | 0.0385        | -    | -         |
| dfA12     | 0          | 8.6        | 6    | 0.0352        | 5    | 0.0377        | 3    | 0.0962    |
| dfA142    | 3          | 3.6        | 7    | 0.0442        | 7    | 0.0457        | -    | -         |
| dfA319    | 0          | 11.3       | 8    | 0.0754        | 8    | 0.0779        | 20   | 0.4986    |
| dfA37     | 0          | 10.6       | 9    | 0.0810        | 9    | 0.0835        | 17   | 0.3728    |
| dfA35     | 0          | 7.5        | 10   | 0.1029        | 10   | 0.1027        | -    | -         |
| dfA41     | 1          | 8.2        | 11   | 0.1371        | 11   | 0.1361        | -    | -         |
| dfA7      | 0          | 4.7        | 12   | 0.1459        | 12   | 0.1403        | -    | -         |
| dfA336    | 0          | 8.4        | 13   | 0.1565        | 13   | 0.1531        | -    | -         |
| dfA133    | 0          | 6.8        | 14   | 0.1726        | 16   | 0.1736        | -    | -         |
| dfA70     | 0          | 7.9        | 15   | 0.1746        | 14   | 0.1715        | -    | -         |
| dfA22     | 0          | 6.5        | 16   | 0.1776        | 15   | 0.1723        | 12   | 0.2373    |
| dfA151    | 0          | 4          | 17   | 0.1796        | 17   | 0.1739        | -    | -         |
| dfA3      | 0          | 0          | 18   | 0.1817        | 18   | 0.1758        | -    | -         |
| dfA14     | 0          | 1.3        | 19   | 0.1934        | 19   | 0.1866        | 14   | 0.2625    |
| dfA1266   | 0          | 9.7        | 20   | 0.1952        | 20   | 0.1916        | -    | -         |
| dfA81     | 0          | 9          | 21   | 0.1979        | 21   | 0.1925        | 7    | 0.1485    |
| dfA19     | 0          | 1.9        | 22   | 0.2114        | 22   | 0.2057        | -    | -         |
| dfA92     | 0          | 11.2       | 23   | 0.2142        | 24   | 0.2111        | -    | -         |
| dfA354    | 0          | 9.6        | 24   | 0.2172        | 23   | 0.2108        | -    | -         |
| dfA295    | 0          | 11.3       | 25   | 0.2184        | 25   | 0.2126        | -    | -         |
| dfA318    | 0          | 12.6       | 26   | 0.2349        | 27   | 0.2299        | -    | -         |
| dfA177    | 0          | 7.7        | 27   | 0.2355        | 26   | 0.2290        | 6    | 0.1428    |
| dfA88     | 0          | 10.1       | 28   | 0.2390        | 28   | 0.2325        | -    | -         |
| dfA104    | 0          | 7.6        | 29   | 0.2398        | 29   | 0.2331        | 8    | 0.1593    |
| dfA239    | 0          | 7.9        | 30   | 0.2454        | 30   | 0.2391        | 18   | 0.4050    |
| dfA30     | 0          | 8.3        | 31   | 0.2509        | 31   | 0.2454        | -    | -         |
| dfA275    | 0          | 7.3        | 32   | 0.2564        | 32   | 0.2492        | 15   | 0.3080    |
| dfA137    | 0          | 10         | 33   | 0.2610        | 33   | 0.2541        | -    | -         |
| dfA109    | 0          | 9.5        | 34   | 0.2678        | 34   | 0.2622        | -    | -         |
| dfA205    | 0          | 0.2        | 35   | 0.2680        | 35   | 0.2625        | 19   | 0.4529    |
| dfA1367   | 0          | 7.4        | 36   | 0.2706        | 36   | 0.2667        | -    | -         |
| dfA144    | 0          | 7.6        | 37   | 0.2720        | 37   | 0.2670        | -    | -         |
| dfA1261   | 0          | 6.4        | 38   | 0.2736        | 39   | 0.2690        | -    | -         |
| dfA182    | 0          | 10.7       | 39   | 0.2766        | 40   | 0.2725        | -    | -         |
| dfA1      | 1          | 4.3        | 40   | 0.2788        | 38   | 0.2686        | 11   | 0.2303    |
| dfA57     | 0          | 11.5       | 41   | 0.2901        | 41   | 0.2795        | -    | -         |

continued...

| structure | duplicates | $\Delta H$ | rank | VC-xPWDF (3h) | rank | VC-xPWDF (2m) | rank | autoFIDEL |
|-----------|------------|------------|------|---------------|------|---------------|------|-----------|
| dfA95     | 0          | 9.2        | 42   | 0.3003        | 42   | 0.2963        | -    | -         |
| dfA67     | 0          | 5.9        | 43   | 0.3105        | 43   | 0.3025        | -    | -         |
| dfA227    | 0          | 12.6       | 44   | 0.3109        | 44   | 0.3048        | -    | -         |
| dfA651    | 0          | 13.2       | 45   | 0.3215        | 45   | 0.3159        | -    | -         |
| dfA199    | 0          | 6.8        | 46   | 0.3548        | 46   | 0.3466        | 4    | 0.1049    |
| dfA16     | 0          | 4.2        | 47   | 0.3698        | 47   | 0.3609        | -    | -         |
| dfA584    | 0          | 6          | 48   | 0.3703        | 48   | 0.3622        | -    | -         |
| dfA25     | 0          | 3.8        | 49   | 0.3719        | 49   | 0.3640        | -    | -         |
| dfA129    | 0          | 6.9        | 50   | 0.3764        | 50   | 0.3687        | -    | -         |
| dfA132    | 0          | 14         | 51   | 0.3795        | 51   | 0.3707        | -    | -         |
| dfA155    | 0          | 9.9        | 52   | 0.4136        | 52   | 0.3964        | -    | -         |
| dfA347    | 0          | 9.4        | 53   | 0.4144        | 53   | 0.4053        | -    | -         |
| dfA54     | 0          | 7.3        | 54   | 0.4162        | 54   | 0.4083        | -    | -         |
| dfA102    | 0          | 5.6        | 55   | 0.4167        | 55   | 0.4087        | 10   | 0.2201    |
| dfA200    | 0          | 12.3       | 56   | 0.4314        | 56   | 0.4213        | -    | -         |
| dfA80     | 0          | 4.3        | 57   | 0.4338        | 57   | 0.4252        | 2    | 0.0942    |
| dfA139    | 0          | 7.2        | 58   | 0.4383        | 58   | 0.4299        | -    | -         |
| dfA5      | 0          | 8          | 59   | 0.4406        | 59   | 0.4305        | 9    | 0.1780    |
| dfA51     | 0          | 6.9        | 60   | 0.4579        | 61   | 0.4498        | -    | -         |
| dfA218    | 0          | 11         | 61   | 0.4585        | 60   | 0.4486        | -    | -         |
| dfA219    | 0          | 7.3        | 62   | 0.4639        | 62   | 0.4514        | 16   | 0.3668    |
| dfA1759   | 0          | 6.7        | 63   | 0.4700        | 63   | 0.4615        | -    | -         |
| dfA596    | 0          | 11.9       | 64   | 0.4758        | 64   | 0.4666        | -    | -         |
| dfA43     | 0          | 11.2       | 65   | 0.4976        | 65   | 0.4855        | -    | -         |
| dfA3039   | 0          | 8.3        | 66   | 0.5060        | 66   | 0.4936        | -    | -         |
| dfA72     | 0          | 12.6       | 67   | 0.5068        | 67   | 0.4952        | -    | -         |
| dfA247    | 0          | 12.5       | 68   | 0.5091        | 68   | 0.4996        | 21   | 0.6543    |
| dfA119    | 0          | 12.9       | 69   | 0.5352        | 69   | 0.5237        | -    | -         |
| dfA126    | 0          | 11         | 70   | 0.5390        | 70   | 0.5266        | -    | -         |
| dfA98     | 0          | 11         | 71   | 0.5633        | 71   | 0.5507        | -    | -         |
| dfA48     | 0          | 9.7        | 72   | 0.5824        | 72   | 0.5696        | -    | -         |
| dfA112    | 0          | 11.4       | 73   | 0.5913        | 73   | 0.5788        | -    | -         |
| dfA56     | 0          | 8.8        | 74   | 0.5949        | 74   | 0.5819        | -    | -         |
| dfA213    | 0          | 11.1       | 75   | 0.6127        | 75   | 0.5940        | -    | -         |
| dfA451    | 0          | 5.8        | 76   | 0.8406        | 76   | 0.8233        | 13   | 0.2551    |
| dfA120    | 0          | 5.8        | 77   | 0.8713        | 77   | 0.8552        | -    | -         |
| dfA172    | 0          | 6.4        | 78   | 0.8827        | 78   | 0.8693        | -    | -         |
| dfA250    | 0          | 11.8       | 79   | 0.8843        | 79   | 0.8709        | -    | -         |
| dfA361    | 0          | 9.6        | 80   | 0.9000        | 80   | 0.8863        | -    | -         |

Table S11: Summary of data for acetaminophen. Relative enthalpy is given in kJ/mol, ranks are according to the next-right column, autoFIDEL comparisons were made with the default program parameters and the experimental powder diffractograms collected over 3 hrs.

| structure | duplicates | $\Delta H$ | rank | VC-xPWDF (3h) | rank | VC-xPWDF (2m) | rank | autoFIDEL |
|-----------|------------|------------|------|---------------|------|---------------|------|-----------|
| HXACAN35  | -          | -          | 1    | 0.0494        | 1    | 0.0538        | -    | -         |
| HXACAN04  | -          | -          | 2    | 0.0602        | 2    | 0.0639        | -    | -         |
| HXACAN15  | -          | -          | 3    | 0.0634        | 3    | 0.0666        | -    | -         |
| HXACAN13  | -          | -          | 4    | 0.0670        | 4    | 0.0702        | -    | -         |
| dfA79     | 1          | 0          | 5    | 0.0709        | 5    | 0.0717        | 22   | 0.4398    |
| HXACAN09  | -          | -          | 6    | 0.0772        | 6    | 0.0772        | -    | -         |
| dfA2962   | 0          | 11.2       | 10   | 0.1256        | 10   | 0.1208        | -    | -         |
| dfA12804  | 0          | 9.7        | 11   | 0.1289        | 12   | 0.1265        | -    | -         |
| dfA12134  | 0          | 8.1        | 12   | 0.1294        | 13   | 0.1270        | 16   | 0.4224    |
| dfA19404  | 0          | 8.3        | 13   | 0.1346        | 11   | 0.1265        | -    | -         |
| dfA2934   | 0          | 8.2        | 14   | 0.1362        | 14   | 0.1281        | -    | -         |
| dfA14108  | 0          | 11.9       | 15   | 0.1454        | 18   | 0.1532        | -    | -         |
| dfA12397  | 0          | 4.4        | 16   | 0.1529        | 15   | 0.1476        | -    | -         |
| dfA14478  | 0          | 12.6       | 17   | 0.1531        | 16   | 0.1493        | -    | -         |
| dfA6573   | 0          | 11.7       | 18   | 0.1575        | 17   | 0.1511        | 20   | 0.4324    |
| dfA301    | 0          | 6.3        | 19   | 0.1604        | 20   | 0.1598        | 36   | 0.4963    |
| dfA8230   | 0          | 11.8       | 20   | 0.1619        | 19   | 0.1547        | -    | -         |
| dfA857    | 0          | 11.5       | 21   | 0.1623        | 21   | 0.1619        | -    | -         |
| dfA7552   | 0          | 14.2       | 22   | 0.1795        | 24   | 0.1777        | -    | -         |
| dfA11586  | 0          | 6.8        | 23   | 0.1797        | 22   | 0.1721        | -    | -         |
| dfA12281  | 0          | 11.9       | 24   | 0.1823        | 31   | 0.1876        | -    | -         |
| dfA16671  | 0          | 12.7       | 25   | 0.1833        | 25   | 0.1790        | -    | -         |
| dfA26324  | 0          | 11.9       | 26   | 0.1833        | 32   | 0.1887        | -    | -         |
| dfA3516   | 1          | 12.3       | 27   | 0.1854        | 23   | 0.1771        | 34   | 0.4885    |
| dfA98     | 0          | 4.1        | 28   | 0.1862        | 29   | 0.1860        | -    | -         |
| dfA9661   | 0          | 12.5       | 29   | 0.1872        | 27   | 0.1805        | -    | -         |
| dfA23940  | 0          | 12.3       | 30   | 0.1875        | 26   | 0.1794        | -    | -         |
| dfA19074  | 0          | 14.6       | 31   | 0.1902        | 30   | 0.1866        | -    | -         |
| dfA2896   | 0          | 9.4        | 32   | 0.1903        | 34   | 0.1893        | -    | -         |
| dfA15951  | 0          | 13.9       | 33   | 0.1920        | 36   | 0.1906        | -    | -         |
| dfA21868  | 0          | 14.8       | 34   | 0.1942        | 51   | 0.2006        | -    | -         |
| dfA4264   | 0          | 9.3        | 35   | 0.1943        | 33   | 0.1891        | -    | -         |
| dfA6958   | 0          | 12.4       | 36   | 0.1952        | 43   | 0.1955        | -    | -         |
| dfA392    | 0          | 6.2        | 37   | 0.1962        | 35   | 0.1895        | -    | -         |
| dfA1437   | 0          | 9.8        | 38   | 0.1964        | 40   | 0.1947        | -    | -         |
| dfA15830  | 0          | 14.8       | 39   | 0.1966        | 53   | 0.2024        | -    | -         |
| dfA1158   | 0          | 10.7       | 40   | 0.1986        | 28   | 0.1852        | 65   | 0.6121    |
| dfA13319  | 0          | 14.8       | 41   | 0.1988        | 37   | 0.1927        | -    | -         |
| dfA16964  | 0          | 6.5        | 42   | 0.1998        | 41   | 0.1954        | -    | -         |
| dfA17092  | 0          | 14.3       | 43   | 0.2002        | 44   | 0.1962        | -    | -         |
| dfA3464   | 0          | 11.1       | 44   | 0.2004        | 39   | 0.1945        | -    | -         |

continued...

| structure | duplicates | $\Delta H$ | rank | VC-xPWDF (3h) | rank | VC-xPWDF (2m) | rank | autoFIDEL |
|-----------|------------|------------|------|---------------|------|---------------|------|-----------|
| dfA4938   | 0          | 8.7        | 45   | 0.2013        | 48   | 0.2000        | -    | -         |
| dfA3569   | 0          | 13.9       | 46   | 0.2014        | 50   | 0.2004        | -    | -         |
| dfA11977  | 0          | 11.2       | 47   | 0.2014        | 46   | 0.1976        | -    | -         |
| dfA14902  | 0          | 12.2       | 48   | 0.2033        | 38   | 0.1935        | -    | -         |
| dfA390    | 0          | 5.8        | 49   | 0.2037        | 52   | 0.2012        | 25   | 0.4622    |
| dfA3141   | 1          | 12.3       | 50   | 0.2042        | 42   | 0.1954        | -    | -         |
| dfA9748   | 0          | 6.6        | 51   | 0.2046        | 45   | 0.1964        | -    | -         |
| dfA12913  | 0          | 11         | 52   | 0.2061        | 59   | 0.2065        | -    | -         |
| dfA4546   | 0          | 10.2       | 53   | 0.2066        | 58   | 0.2054        | -    | -         |
| dfA13249  | 0          | 11         | 54   | 0.2079        | 64   | 0.2076        | -    | -         |
| dfA21594  | 0          | 14.9       | 55   | 0.2082        | 57   | 0.2048        | -    | -         |
| dfA851    | 0          | 7.2        | 56   | 0.2083        | 49   | 0.2000        | -    | -         |
| dfA25032  | 0          | 12.5       | 57   | 0.2085        | 56   | 0.2042        | -    | -         |
| dfA14868  | 0          | 14.4       | 58   | 0.2089        | 47   | 0.1995        | -    | -         |
| dfA1563   | 0          | 7.5        | 59   | 0.2090        | 54   | 0.2026        | -    | -         |
| dfA10679  | 0          | 11.6       | 60   | 0.2093        | 55   | 0.2040        | 6    | 0.3534    |
| dfA19200  | 0          | 14.8       | 61   | 0.2095        | 61   | 0.2069        | -    | -         |
| dfA6581   | 0          | 11.1       | 62   | 0.2095        | 62   | 0.2073        | -    | -         |
| dfA24157  | 0          | 14.1       | 63   | 0.2139        | 74   | 0.2193        | -    | -         |
| dfA27154  | 0          | 13         | 64   | 0.2139        | 69   | 0.2143        | 8    | 0.3668    |
| dfA9399   | 0          | 5.1        | 65   | 0.2143        | 67   | 0.2131        | -    | -         |
| dfA24215  | 0          | 8.6        | 66   | 0.2152        | 65   | 0.2089        | -    | -         |
| dfA19099  | 0          | 13.8       | 67   | 0.2159        | 73   | 0.2187        | -    | -         |
| dfA19438  | 0          | 11.6       | 68   | 0.2160        | 63   | 0.2073        | -    | -         |
| dfA3833   | 0          | 9          | 69   | 0.2185        | 68   | 0.2132        | -    | -         |
| dfA9414   | 0          | 4.5        | 70   | 0.2190        | 71   | 0.2168        | -    | -         |
| dfA21088  | 0          | 10.1       | 71   | 0.2198        | 66   | 0.2114        | -    | -         |
| dfA18942  | 0          | 13.6       | 72   | 0.2199        | 72   | 0.2176        | -    | -         |
| dfA410    | 0          | 5.4        | 73   | 0.2199        | 60   | 0.2068        | -    | -         |
| dfA1583   | 0          | 8.6        | 74   | 0.2222        | 70   | 0.2156        | -    | -         |
| dfA17036  | 0          | 6.1        | 75   | 0.2236        | 79   | 0.2218        | -    | -         |
| dfA445    | 0          | 11.4       | 76   | 0.2245        | 85   | 0.2252        | -    | -         |
| dfA15161  | 0          | 7.7        | 77   | 0.2259        | 76   | 0.2213        | -    | -         |
| dfA1933   | 0          | 9.2        | 78   | 0.2266        | 82   | 0.2237        | -    | -         |
| dfA5138   | 0          | 12.5       | 79   | 0.2273        | 83   | 0.2241        | -    | -         |
| dfA1807   | 0          | 8.7        | 80   | 0.2283        | 77   | 0.2215        | -    | -         |
| dfA15043  | 0          | 14.7       | 81   | 0.2295        | 84   | 0.2243        | -    | -         |
| dfA3397   | 0          | 5.4        | 82   | 0.2296        | 88   | 0.2282        | -    | -         |
| dfA905    | 0          | 6.8        | 83   | 0.2296        | 91   | 0.2305        | -    | -         |
| dfA2548   | 0          | 10.4       | 84   | 0.2301        | 80   | 0.2236        | 18   | 0.4296    |
| dfA4314   | 0          | 9.5        | 85   | 0.2305        | 75   | 0.2208        | -    | -         |
| dfA4304   | 0          | 11.4       | 86   | 0.2309        | 78   | 0.2216        | -    | -         |
| dfA14749  | 0          | 13.6       | 87   | 0.2332        | 92   | 0.2308        | -    | -         |
| dfA24221  | 0          | 14.9       | 88   | 0.2333        | 81   | 0.2237        | -    | -         |

continued...

| structure | duplicates | $\Delta H$ | rank | VC-xPWDF (3h) | rank | VC-xPWDF (2m) | rank | autoFIDEL |
|-----------|------------|------------|------|---------------|------|---------------|------|-----------|
| dfA15679  | 0          | 7.7        | 89   | 0.2336        | 87   | 0.2280        | -    | -         |
| dfA1229   | 0          | 7.6        | 90   | 0.2337        | 101  | 0.2353        | -    | -         |
| dfA9036   | 0          | 12.4       | 91   | 0.2357        | 90   | 0.2299        | -    | -         |
| dfA16478  | 0          | 14.5       | 92   | 0.2362        | 86   | 0.2279        | -    | -         |
| dfA4451   | 0          | 10         | 93   | 0.2374        | 89   | 0.2295        | -    | -         |
| dfA14382  | 0          | 6.2        | 94   | 0.2381        | 94   | 0.2321        | -    | -         |
| dfA25186  | 0          | 12.9       | 95   | 0.2387        | 103  | 0.2361        | -    | -         |
| dfA960    | 0          | 8.9        | 96   | 0.2398        | 97   | 0.2352        | -    | -         |
| dfA1777   | 0          | 11         | 97   | 0.2408        | 104  | 0.2372        | -    | -         |
| dfA3103   | 0          | 7.1        | 98   | 0.2410        | 96   | 0.2345        | 2    | 0.3240    |
| dfA15171  | 0          | 14.1       | 99   | 0.2421        | 115  | 0.2407        | -    | -         |
| dfA21070  | 0          | 8.7        | 100  | 0.2422        | 93   | 0.2312        | -    | -         |
| dfA4978   | 0          | 6          | 101  | 0.2426        | 123  | 0.2465        | -    | -         |
| dfA2240   | 0          | 9.3        | 102  | 0.2429        | 95   | 0.2345        | -    | -         |
| dfA3966   | 0          | 11.8       | 103  | 0.2433        | 114  | 0.2406        | -    | -         |
| dfA7239   | 0          | 7.7        | 104  | 0.2439        | 107  | 0.2386        | -    | -         |
| dfA2705   | 0          | 8          | 105  | 0.2447        | 105  | 0.2379        | 1    | 0.3229    |
| dfA21529  | 0          | 7.1        | 106  | 0.2454        | 108  | 0.2389        | -    | -         |
| dfA2761   | 0          | 13.9       | 107  | 0.2455        | 121  | 0.2456        | -    | -         |
| dfA7836   | 0          | 13.8       | 108  | 0.2457        | 99   | 0.2353        | -    | -         |
| dfA9355   | 0          | 14.7       | 109  | 0.2457        | 116  | 0.2423        | 21   | 0.4366    |
| dfA5411   | 0          | 9.3        | 110  | 0.2459        | 120  | 0.2452        | 7    | 0.3620    |
| dfA3266   | 0          | 11.1       | 111  | 0.2461        | 98   | 0.2352        | -    | -         |
| dfA14265  | 0          | 9.8        | 112  | 0.2463        | 102  | 0.2358        | -    | -         |
| dfA5402   | 0          | 13.2       | 113  | 0.2471        | 111  | 0.2398        | -    | -         |
| dfA12187  | 0          | 13.6       | 114  | 0.2483        | 106  | 0.2383        | -    | -         |
| dfA4000   | 0          | 14.1       | 115  | 0.2486        | 100  | 0.2353        | 46   | 0.5364    |
| dfA1365   | 0          | 10.2       | 116  | 0.2486        | 113  | 0.2404        | -    | -         |
| dfA8259   | 0          | 11.5       | 117  | 0.2492        | 109  | 0.2394        | -    | -         |
| dfA10708  | 0          | 12.5       | 118  | 0.2505        | 122  | 0.2459        | -    | -         |
| dfA16648  | 0          | 12.9       | 119  | 0.2519        | 117  | 0.2434        | -    | -         |
| dfA794    | 0          | 6.6        | 120  | 0.2530        | 137  | 0.2528        | -    | -         |
| dfA5558   | 0          | 9          | 121  | 0.2533        | 112  | 0.2399        | -    | -         |
| dfA1928   | 0          | 8.2        | 122  | 0.2539        | 126  | 0.2481        | -    | -         |
| dfA12111  | 0          | 11.1       | 123  | 0.2541        | 119  | 0.2445        | -    | -         |
| dfA405    | 0          | 6.2        | 124  | 0.2542        | 118  | 0.2445        | -    | -         |
| dfA6986   | 0          | 13.4       | 125  | 0.2545        | 125  | 0.2470        | -    | -         |
| dfA75     | 0          | 3.4        | 126  | 0.2551        | 124  | 0.2470        | -    | -         |
| dfA10723  | 0          | 13.3       | 127  | 0.2553        | 141  | 0.2541        | -    | -         |
| dfA3236   | 0          | 13.2       | 128  | 0.2554        | 110  | 0.2397        | -    | -         |
| dfA20626  | 0          | 13.4       | 129  | 0.2556        | 142  | 0.2541        | -    | -         |
| dfA14000  | 0          | 13.1       | 130  | 0.2557        | 128  | 0.2493        | -    | -         |
| dfA3994   | 0          | 14.3       | 131  | 0.2560        | 146  | 0.2554        | -    | -         |
| dfA13971  | 0          | 13.4       | 132  | 0.2582        | 136  | 0.2523        | -    | -         |

continued...

| structure | duplicates | $\Delta H$ | rank | VC-xPWDF (3h) | rank | VC-xPWDF (2m) | rank | autoFIDEL |
|-----------|------------|------------|------|---------------|------|---------------|------|-----------|
| dfA6286   | 0          | 11         | 133  | 0.2584        | 140  | 0.2540        | -    | -         |
| dfA11309  | 0          | 14         | 134  | 0.2585        | 129  | 0.2504        | -    | -         |
| dfA3712   | 0          | 6.8        | 135  | 0.2592        | 147  | 0.2555        | -    | -         |
| dfA898    | 0          | 7.5        | 136  | 0.2595        | 160  | 0.2615        | 58   | 0.5773    |
| dfA2015   | 0          | 9.1        | 137  | 0.2596        | 127  | 0.2488        | -    | -         |
| dfA1054   | 0          | 8.1        | 138  | 0.2599        | 163  | 0.2631        | -    | -         |
| dfA3508   | 0          | 12.3       | 139  | 0.2599        | 131  | 0.2511        | -    | -         |
| dfA14986  | 0          | 14.7       | 140  | 0.2601        | 130  | 0.2508        | -    | -         |
| dfA22959  | 0          | 13.6       | 141  | 0.2602        | 148  | 0.2574        | -    | -         |
| dfA3762   | 0          | 10.9       | 142  | 0.2603        | 145  | 0.2548        | -    | -         |
| dfA3724   | 0          | 14.7       | 143  | 0.2605        | 155  | 0.2605        | -    | -         |
| dfA10885  | 0          | 11         | 144  | 0.2606        | 161  | 0.2618        | -    | -         |
| dfA21798  | 0          | 12.9       | 145  | 0.2609        | 139  | 0.2533        | -    | -         |
| dfA1629   | 0          | 8.1        | 146  | 0.2610        | 134  | 0.2519        | -    | -         |
| dfA6073   | 0          | 12         | 147  | 0.2612        | 135  | 0.2523        | -    | -         |
| dfA2805   | 0          | 11.4       | 148  | 0.2618        | 132  | 0.2512        | -    | -         |
| dfA809    | 0          | 7.1        | 149  | 0.2619        | 143  | 0.2546        | -    | -         |
| dfA423    | 0          | 6.3        | 150  | 0.2627        | 133  | 0.2518        | -    | -         |
| dfA3858   | 0          | 13.5       | 151  | 0.2631        | 158  | 0.2612        | 13   | 0.3995    |
| dfA2363   | 0          | 8.1        | 152  | 0.2633        | 144  | 0.2548        | -    | -         |
| dfA2825   | 0          | 10.8       | 153  | 0.2645        | 173  | 0.2651        | -    | -         |
| dfA18809  | 0          | 13.3       | 154  | 0.2649        | 184  | 0.2706        | -    | -         |
| dfA16168  | 0          | 12.6       | 155  | 0.2649        | 149  | 0.2580        | -    | -         |
| dfA15237  | 0          | 2.5        | 156  | 0.2650        | 164  | 0.2638        | 47   | 0.5386    |
| dfA13930  | 0          | 8.3        | 157  | 0.2656        | 168  | 0.2642        | -    | -         |
| dfA2907   | 0          | 13.8       | 158  | 0.2661        | 174  | 0.2660        | -    | -         |
| dfA26353  | 0          | 11.6       | 159  | 0.2663        | 138  | 0.2530        | -    | -         |
| dfA4549   | 0          | 12.8       | 160  | 0.2665        | 180  | 0.2676        | -    | -         |
| dfA11209  | 0          | 12.6       | 161  | 0.2674        | 167  | 0.2641        | -    | -         |
| dfA7682   | 0          | 11.2       | 162  | 0.2677        | 150  | 0.2581        | -    | -         |
| dfA2162   | 0          | 8.5        | 163  | 0.2678        | 178  | 0.2667        | -    | -         |
| dfA6880   | 0          | 9.6        | 164  | 0.2679        | 151  | 0.2585        | -    | -         |
| dfA13115  | 0          | 14.4       | 165  | 0.2679        | 159  | 0.2614        | -    | -         |
| dfA4675   | 0          | 11.6       | 166  | 0.2685        | 170  | 0.2648        | -    | -         |
| dfA13264  | 0          | 13         | 167  | 0.2686        | 165  | 0.2639        | -    | -         |
| dfA8802   | 0          | 14.2       | 168  | 0.2691        | 169  | 0.2646        | -    | -         |
| dfA3775   | 0          | 10.1       | 169  | 0.2691        | 157  | 0.2611        | -    | -         |
| dfA12925  | 0          | 14.4       | 170  | 0.2693        | 172  | 0.2651        | 67   | 0.6192    |
| dfA22485  | 0          | 13.7       | 171  | 0.2698        | 156  | 0.2608        | -    | -         |
| dfA10027  | 0          | 10.4       | 172  | 0.2698        | 162  | 0.2622        | -    | -         |
| dfA6828   | 0          | 14.8       | 173  | 0.2705        | 152  | 0.2589        | -    | -         |
| dfA19544  | 0          | 11.6       | 174  | 0.2707        | 197  | 0.2775        | -    | -         |
| dfA426    | 0          | 7.9        | 175  | 0.2711        | 171  | 0.2651        | -    | -         |
| dfA5087   | 0          | 9.4        | 176  | 0.2713        | 181  | 0.2687        | 35   | 0.4891    |

continued...

| structure | duplicates | $\Delta H$ | rank | VC-xPWDF (3h) | rank | VC-xPWDF (2m) | rank | autoFIDEL |
|-----------|------------|------------|------|---------------|------|---------------|------|-----------|
| dfA15003  | 0          | 14.6       | 177  | 0.2720        | 185  | 0.2706        | -    | -         |
| dfA19884  | 0          | 12.6       | 178  | 0.2727        | 179  | 0.2676        | -    | -         |
| dfA21535  | 0          | 10.2       | 179  | 0.2728        | 176  | 0.2664        | -    | -         |
| dfA5269   | 0          | 9.7        | 180  | 0.2734        | 153  | 0.2589        | 50   | 0.5509    |
| dfA3084   | 0          | 8.9        | 181  | 0.2745        | 175  | 0.2661        | -    | -         |
| dfA16280  | 1          | 5.5        | 182  | 0.2745        | 166  | 0.2641        | 32   | 0.4829    |
| dfA3623   | 0          | 10.9       | 183  | 0.2772        | 177  | 0.2665        | -    | -         |
| dfA7211   | 0          | 7.2        | 184  | 0.2779        | 204  | 0.2811        | -    | -         |
| dfA2922   | 0          | 6.3        | 185  | 0.2779        | 188  | 0.2719        | -    | -         |
| dfA371    | 0          | 6.3        | 186  | 0.2781        | 154  | 0.2599        | -    | -         |
| dfA8901   | 0          | 15         | 187  | 0.2789        | 200  | 0.2781        | 27   | 0.4732    |
| dfA15311  | 0          | 9.7        | 188  | 0.2798        | 190  | 0.2733        | -    | -         |
| dfA9959   | 0          | 14         | 189  | 0.2801        | 192  | 0.2742        | -    | -         |
| dfA24848  | 0          | 12.8       | 190  | 0.2812        | 191  | 0.2742        | -    | -         |
| dfA46     | 1          | 0.3        | 191  | 0.2817        | 183  | 0.2695        | -    | -         |
| dfA10615  | 0          | 11.8       | 192  | 0.2826        | 198  | 0.2776        | -    | -         |
| dfA3934   | 0          | 11.1       | 193  | 0.2827        | 194  | 0.2755        | -    | -         |
| dfA15359  | 0          | 13.6       | 194  | 0.2828        | 189  | 0.2729        | 54   | 0.5640    |
| dfA8480   | 0          | 13.5       | 195  | 0.2830        | 205  | 0.2815        | -    | -         |
| dfA2488   | 0          | 14.3       | 196  | 0.2832        | 186  | 0.2713        | -    | -         |
| dfA8201   | 0          | 12.2       | 197  | 0.2835        | 193  | 0.2747        | -    | -         |
| dfA9538   | 0          | 13.8       | 198  | 0.2838        | 211  | 0.2850        | -    | -         |
| dfA8136   | 0          | 10.7       | 199  | 0.2842        | 195  | 0.2768        | -    | -         |
| dfA1187   | 1          | 8.9        | 200  | 0.2854        | 196  | 0.2769        | -    | -         |
| dfA23731  | 1          | 12         | 201  | 0.2857        | 216  | 0.2874        | 31   | 0.4792    |
| dfA2815   | 0          | 0.7        | 202  | 0.2871        | 202  | 0.2795        | -    | -         |
| dfA13922  | 0          | 11.6       | 203  | 0.2874        | 201  | 0.2788        | -    | -         |
| dfA16157  | 0          | 7.4        | 204  | 0.2877        | 224  | 0.2902        | -    | -         |
| dfA13861  | 0          | 13.1       | 205  | 0.2878        | 182  | 0.2691        | -    | -         |
| dfA1870   | 0          | 8.3        | 206  | 0.2902        | 187  | 0.2719        | -    | -         |
| dfA829    | 0          | 7.3        | 207  | 0.2907        | 203  | 0.2809        | -    | -         |
| dfA1851   | 0          | 11.1       | 208  | 0.2911        | 220  | 0.2886        | -    | -         |
| dfA13329  | 0          | 11.2       | 209  | 0.2917        | 199  | 0.2777        | -    | -         |
| dfA15445  | 0          | 9.4        | 210  | 0.2921        | 210  | 0.2849        | -    | -         |
| dfA5290   | 0          | 7.2        | 211  | 0.2921        | 208  | 0.2841        | -    | -         |
| dfA15368  | 0          | 14.6       | 212  | 0.2936        | 207  | 0.2829        | -    | -         |
| dfA3455   | 0          | 11.1       | 213  | 0.2941        | 218  | 0.2883        | -    | -         |
| dfA74     | 0          | 3.5        | 214  | 0.2943        | 212  | 0.2854        | -    | -         |
| dfA7656   | 0          | 14.3       | 215  | 0.2949        | 217  | 0.2876        | -    | -         |
| dfA739    | 0          | 6.4        | 216  | 0.2955        | 223  | 0.2899        | -    | -         |
| dfA2936   | 0          | 9          | 217  | 0.2956        | 209  | 0.2847        | -    | -         |
| dfA20156  | 0          | 13.5       | 218  | 0.2969        | 206  | 0.2821        | -    | -         |
| dfA19469  | 0          | 7.7        | 219  | 0.2970        | 215  | 0.2865        | -    | -         |
| dfA714    | 0          | 6.3        | 220  | 0.2973        | 226  | 0.2911        | 5    | 0.3494    |

continued...



| structure | duplicates | $\Delta H$ | rank | VC-xPWDF (3h) | rank | VC-xPWDF (2m) | rank | autoFIDEL |
|-----------|------------|------------|------|---------------|------|---------------|------|-----------|
| dfA3899   | 0          | 5.3        | 221  | 0.2980        | 238  | 0.3007        | -    | -         |
| dfA13542  | 0          | 14.2       | 222  | 0.2980        | 214  | 0.2860        | -    | -         |
| dfA26472  | 0          | 14.1       | 223  | 0.2986        | 221  | 0.2893        | -    | -         |
| dfA21196  | 0          | 8.8        | 224  | 0.2987        | 227  | 0.2911        | -    | -         |
| dfA5141   | 0          | 14.5       | 225  | 0.2989        | 232  | 0.2986        | -    | -         |
| dfA18835  | 0          | 14.7       | 226  | 0.2995        | 233  | 0.2990        | -    | -         |
| dfA612    | 0          | 7.9        | 227  | 0.2997        | 229  | 0.2942        | -    | -         |
| dfA26414  | 0          | 11         | 228  | 0.3007        | 222  | 0.2893        | -    | -         |
| dfA16249  | 0          | 14.7       | 229  | 0.3019        | 225  | 0.2904        | -    | -         |
| dfA4403   | 0          | 12.2       | 230  | 0.3020        | 228  | 0.2937        | -    | -         |
| dfA4168   | 0          | 1.8        | 231  | 0.3029        | 219  | 0.2884        | -    | -         |
| dfA1284   | 0          | 8.1        | 232  | 0.3034        | 244  | 0.3033        | -    | -         |
| dfA16410  | 0          | 14.9       | 233  | 0.3041        | 234  | 0.2995        | -    | -         |
| dfA5906   | 0          | 7.7        | 234  | 0.3049        | 231  | 0.2983        | -    | -         |
| dfA25497  | 0          | 14.7       | 235  | 0.3051        | 252  | 0.3066        | -    | -         |
| dfA13572  | 0          | 13.2       | 236  | 0.3067        | 213  | 0.2857        | -    | -         |
| dfA3157   | 0          | 11.6       | 237  | 0.3070        | 243  | 0.3029        | -    | -         |
| dfA4030   | 0          | 11.9       | 238  | 0.3079        | 237  | 0.3006        | -    | -         |
| dfA634    | 0          | 11.8       | 239  | 0.3084        | 230  | 0.2965        | -    | -         |
| dfA5448   | 0          | 12.2       | 240  | 0.3092        | 242  | 0.3025        | -    | -         |
| dfA26287  | 0          | 14.1       | 241  | 0.3099        | 236  | 0.3005        | -    | -         |
| dfA9927   | 1          | 7.3        | 242  | 0.3102        | 273  | 0.3148        | -    | -         |
| dfA1024   | 1          | 6.2        | 243  | 0.3103        | 276  | 0.3158        | -    | -         |
| dfA16403  | 0          | 10.6       | 244  | 0.3105        | 246  | 0.3039        | -    | -         |
| dfA8019   | 0          | 12.6       | 245  | 0.3108        | 248  | 0.3048        | -    | -         |
| dfA1289   | 0          | 7.2        | 246  | 0.3114        | 279  | 0.3167        | -    | -         |
| dfA6657   | 0          | 14.4       | 247  | 0.3115        | 249  | 0.3049        | -    | -         |
| dfA822    | 0          | 5.7        | 248  | 0.3118        | 247  | 0.3043        | -    | -         |
| dfA11851  | 0          | 12.8       | 249  | 0.3119        | 262  | 0.3111        | -    | -         |
| dfA146    | 0          | 1.7        | 250  | 0.3119        | 235  | 0.2999        | 14   | 0.4010    |
| dfA8258   | 0          | 10.4       | 251  | 0.3135        | 239  | 0.3012        | -    | -         |
| dfA142    | 0          | 5          | 252  | 0.3135        | 240  | 0.3018        | 15   | 0.4222    |
| dfA305    | 0          | 9.2        | 253  | 0.3144        | 251  | 0.3061        | -    | -         |
| dfA3595   | 0          | 8.5        | 254  | 0.3145        | 278  | 0.3166        | -    | -         |
| dfA1471   | 1          | 10.1       | 255  | 0.3152        | 253  | 0.3076        | -    | -         |
| dfA15590  | 0          | 9.6        | 256  | 0.3154        | 255  | 0.3085        | -    | -         |
| dfA216    | 0          | 6.1        | 257  | 0.3155        | 256  | 0.3089        | -    | -         |
| dfA9705   | 0          | 12.3       | 258  | 0.3171        | 283  | 0.3181        | -    | -         |
| dfA20503  | 0          | 12.4       | 259  | 0.3173        | 245  | 0.3039        | -    | -         |
| dfA2187   | 0          | 7          | 260  | 0.3176        | 258  | 0.3098        | 44   | 0.5346    |
| dfA3982   | 0          | 13.1       | 261  | 0.3178        | 267  | 0.3135        | -    | -         |
| dfA1035   | 0          | 8.4        | 262  | 0.3186        | 241  | 0.3024        | -    | -         |
| dfA14637  | 0          | 14.7       | 263  | 0.3191        | 264  | 0.3122        | -    | -         |
| dfA1628   | 0          | 7.7        | 264  | 0.3192        | 265  | 0.3128        | -    | -         |

continued...

| structure | duplicates | $\Delta H$ | rank | VC-xPWDF (3h) | rank | VC-xPWDF (2m) | rank | autoFIDEL |
|-----------|------------|------------|------|---------------|------|---------------|------|-----------|
| dfA6227   | 0          | 14.8       | 265  | 0.3193        | 272  | 0.3145        | -    | -         |
| dfA2708   | 0          | 5          | 266  | 0.3201        | 289  | 0.3194        | -    | -         |
| dfA9781   | 0          | 14.8       | 267  | 0.3207        | 259  | 0.3109        | -    | -         |
| dfA3948   | 0          | 10.4       | 268  | 0.3207        | 261  | 0.3109        | -    | -         |
| dfA1648   | 0          | 12.7       | 269  | 0.3215        | 274  | 0.3151        | -    | -         |
| dfA2001   | 0          | 14.5       | 270  | 0.3223        | 286  | 0.3191        | -    | -         |
| dfA5414   | 0          | 12         | 271  | 0.3223        | 271  | 0.3141        | -    | -         |
| dfA147    | 0          | 1.7        | 272  | 0.3223        | 260  | 0.3109        | 11   | 0.3940    |
| dfA10751  | 0          | 11.1       | 273  | 0.3226        | 250  | 0.3060        | -    | -         |
| dfA652    | 0          | 5.9        | 274  | 0.3237        | 257  | 0.3091        | -    | -         |
| dfA1157   | 0          | 8.8        | 275  | 0.3239        | 280  | 0.3175        | -    | -         |
| dfA13491  | 0          | 13.6       | 276  | 0.3239        | 254  | 0.3081        | -    | -         |
| dfA15752  | 0          | 11         | 277  | 0.3240        | 269  | 0.3141        | -    | -         |
| dfA1770   | 0          | 10.1       | 278  | 0.3250        | 314  | 0.3309        | -    | -         |
| dfA13085  | 0          | 14.2       | 279  | 0.3252        | 277  | 0.3164        | -    | -         |
| dfA14535  | 0          | 11.9       | 280  | 0.3253        | 294  | 0.3226        | -    | -         |
| dfA26909  | 0          | 11.6       | 281  | 0.3260        | 293  | 0.3217        | -    | -         |
| dfA2989   | 0          | 11.2       | 282  | 0.3274        | 284  | 0.3182        | -    | -         |
| dfA7050   | 0          | 11.5       | 283  | 0.3274        | 281  | 0.3178        | -    | -         |
| dfA3831   | 1          | 11         | 284  | 0.3278        | 290  | 0.3199        | -    | -         |
| dfA3861   | 0          | 8.2        | 285  | 0.3282        | 275  | 0.3158        | -    | -         |
| dfA4569   | 0          | 1.8        | 286  | 0.3283        | 266  | 0.3128        | -    | -         |
| dfA10874  | 0          | 13.7       | 287  | 0.3285        | 282  | 0.3180        | -    | -         |
| dfA11548  | 0          | 13.8       | 288  | 0.3291        | 291  | 0.3209        | -    | -         |
| dfA2991   | 0          | 7.6        | 289  | 0.3292        | 285  | 0.3183        | -    | -         |
| dfA3282   | 0          | 7.9        | 290  | 0.3301        | 263  | 0.3116        | -    | -         |
| dfA6831   | 0          | 2.5        | 291  | 0.3304        | 270  | 0.3141        | -    | -         |
| dfA26137  | 0          | 10.8       | 292  | 0.3311        | 297  | 0.3245        | -    | -         |
| dfA12195  | 0          | 10.9       | 293  | 0.3314        | 268  | 0.3140        | -    | -         |
| dfA384    | 0          | 6.6        | 294  | 0.3316        | 295  | 0.3229        | 52   | 0.5604    |
| dfA2766   | 0          | 6.8        | 295  | 0.3321        | 317  | 0.3321        | -    | -         |
| dfA6875   | 0          | 14.6       | 296  | 0.3322        | 299  | 0.3247        | -    | -         |
| dfA14583  | 0          | 13.8       | 297  | 0.3332        | 316  | 0.3316        | -    | -         |
| dfA7467   | 0          | 7.7        | 298  | 0.3336        | 288  | 0.3193        | -    | -         |
| dfA16960  | 0          | 12.7       | 299  | 0.3340        | 287  | 0.3191        | -    | -         |
| dfA6964   | 0          | 13.5       | 300  | 0.3343        | 292  | 0.3216        | -    | -         |
| dfA1198   | 0          | 8.1        | 301  | 0.3346        | 298  | 0.3247        | -    | -         |
| dfA2173   | 0          | 9.1        | 302  | 0.3360        | 302  | 0.3271        | -    | -         |
| dfA1092   | 0          | 8.9        | 303  | 0.3365        | 312  | 0.3295        | 12   | 0.3948    |
| dfA13648  | 0          | 7.3        | 304  | 0.3372        | 311  | 0.3289        | -    | -         |
| dfA7814   | 0          | 12.2       | 305  | 0.3375        | 310  | 0.3289        | -    | -         |
| dfA3329   | 0          | 13.7       | 306  | 0.3376        | 322  | 0.3337        | -    | -         |
| dfA12120  | 0          | 11.9       | 307  | 0.3377        | 296  | 0.3240        | -    | -         |
| dfA7982   | 0          | 11.4       | 308  | 0.3379        | 305  | 0.3278        | -    | -         |

continued...

| structure | duplicates | $\Delta H$ | rank | VC-xPWDF (3h) | rank | VC-xPWDF (2m) | rank | autoFIDEL |
|-----------|------------|------------|------|---------------|------|---------------|------|-----------|
| dfA2406   | 0          | 8.6        | 309  | 0.3379        | 306  | 0.3278        | 60   | 0.5868    |
| dfA2402   | 0          | 8.7        | 310  | 0.3385        | 303  | 0.3276        | -    | -         |
| dfA9303   | 0          | 13.3       | 311  | 0.3391        | 313  | 0.3300        | -    | -         |
| dfA1741   | 0          | 11         | 312  | 0.3395        | 304  | 0.3277        | -    | -         |
| dfA10623  | 0          | 12.2       | 313  | 0.3400        | 343  | 0.3455        | -    | -         |
| dfA3791   | 0          | 2.4        | 314  | 0.3406        | 308  | 0.3282        | -    | -         |
| dfA10012  | 0          | 13.3       | 315  | 0.3409        | 307  | 0.3279        | -    | -         |
| dfA4001   | 0          | 12.4       | 316  | 0.3418        | 320  | 0.3332        | -    | -         |
| dfA10331  | 0          | 11.2       | 317  | 0.3423        | 301  | 0.3257        | -    | -         |
| dfA15482  | 0          | 10.7       | 318  | 0.3424        | 327  | 0.3386        | -    | -         |
| dfA12386  | 0          | 11.4       | 319  | 0.3426        | 309  | 0.3287        | 29   | 0.4773    |
| dfA14804  | 0          | 2.4        | 320  | 0.3433        | 323  | 0.3342        | 55   | 0.5729    |
| dfA14310  | 0          | 14.8       | 321  | 0.3434        | 300  | 0.3256        | -    | -         |
| dfA1663   | 0          | 7.5        | 322  | 0.3438        | 330  | 0.3393        | -    | -         |
| dfA1528   | 0          | 8.3        | 323  | 0.3450        | 329  | 0.3390        | -    | -         |
| dfA13623  | 0          | 8.9        | 324  | 0.3456        | 319  | 0.3331        | -    | -         |
| dfA1269   | 0          | 7.2        | 325  | 0.3472        | 335  | 0.3421        | -    | -         |
| dfA589    | 0          | 6.5        | 326  | 0.3473        | 336  | 0.3431        | -    | -         |
| dfA7375   | 0          | 14.6       | 327  | 0.3482        | 315  | 0.3313        | -    | -         |
| dfA3743   | 0          | 7.4        | 328  | 0.3482        | 318  | 0.3328        | -    | -         |
| dfA736    | 0          | 4.3        | 329  | 0.3484        | 321  | 0.3334        | -    | -         |
| dfA18197  | 0          | 1.6        | 330  | 0.3495        | 328  | 0.3386        | -    | -         |
| dfA529    | 0          | 5.8        | 331  | 0.3496        | 331  | 0.3395        | 24   | 0.4584    |
| dfA8076   | 0          | 13         | 332  | 0.3496        | 325  | 0.3368        | -    | -         |
| dfA24195  | 0          | 14.4       | 333  | 0.3503        | 346  | 0.3464        | -    | -         |
| dfA724    | 0          | 4.9        | 334  | 0.3505        | 353  | 0.3493        | -    | -         |
| dfA13947  | 0          | 13.9       | 335  | 0.3517        | 326  | 0.3371        | -    | -         |
| dfA415    | 0          | 6.7        | 336  | 0.3518        | 340  | 0.3453        | -    | -         |
| dfA3116   | 0          | 14.7       | 337  | 0.3523        | 324  | 0.3356        | -    | -         |
| dfA3870   | 0          | 12         | 338  | 0.3527        | 333  | 0.3415        | -    | -         |
| dfA8713   | 0          | 13.8       | 339  | 0.3532        | 352  | 0.3487        | -    | -         |
| dfA9116   | 0          | 10.7       | 340  | 0.3545        | 338  | 0.3443        | -    | -         |
| dfA1309   | 0          | 4.9        | 341  | 0.3547        | 350  | 0.3478        | 26   | 0.4670    |
| dfA5565   | 0          | 13.8       | 342  | 0.3548        | 347  | 0.3464        | -    | -         |
| dfA13351  | 0          | 13.2       | 343  | 0.3550        | 339  | 0.3443        | -    | -         |
| dfA12435  | 0          | 13.2       | 344  | 0.3558        | 345  | 0.3460        | -    | -         |
| dfA3472   | 0          | 14.4       | 345  | 0.3559        | 358  | 0.3511        | -    | -         |
| dfA4233   | 0          | 11.5       | 346  | 0.3567        | 348  | 0.3466        | -    | -         |
| dfA3692   | 0          | 12.3       | 347  | 0.3573        | 351  | 0.3483        | -    | -         |
| dfA5361   | 0          | 9.8        | 348  | 0.3573        | 344  | 0.3458        | -    | -         |
| dfA2081   | 0          | 10.8       | 349  | 0.3574        | 354  | 0.3504        | -    | -         |
| dfA94     | 0          | 1.5        | 350  | 0.3575        | 332  | 0.3397        | 40   | 0.5131    |
| dfA8286   | 0          | 7.3        | 351  | 0.3576        | 334  | 0.3420        | -    | -         |
| dfA14490  | 0          | 13.6       | 352  | 0.3584        | 337  | 0.3436        | -    | -         |

continued...

| structure | duplicates | $\Delta H$ | rank | VC-xPWDF (3h) | rank | VC-xPWDF (2m) | rank | autoFIDEL |
|-----------|------------|------------|------|---------------|------|---------------|------|-----------|
| dfA8660   | 0          | 12.6       | 353  | 0.3585        | 361  | 0.3539        | -    | -         |
| dfA7389   | 0          | 11.1       | 354  | 0.3587        | 341  | 0.3453        | -    | -         |
| dfA14390  | 0          | 14.3       | 355  | 0.3597        | 357  | 0.3510        | 30   | 0.4780    |
| dfA1749   | 2          | 8.9        | 356  | 0.3605        | 356  | 0.3506        | -    | -         |
| dfA4952   | 0          | 12.3       | 357  | 0.3608        | 349  | 0.3476        | -    | -         |
| dfA23421  | 0          | 13.6       | 358  | 0.3611        | 342  | 0.3455        | -    | -         |
| dfA22478  | 0          | 12.9       | 359  | 0.3621        | 359  | 0.3513        | -    | -         |
| dfA7502   | 0          | 9.5        | 360  | 0.3627        | 363  | 0.3552        | -    | -         |
| dfA1572   | 0          | 11.2       | 361  | 0.3630        | 355  | 0.3505        | -    | -         |
| dfA19581  | 0          | 12.4       | 362  | 0.3663        | 360  | 0.3532        | -    | -         |
| dfA1771   | 0          | 8          | 363  | 0.3674        | 366  | 0.3583        | -    | -         |
| dfA6533   | 0          | 14.3       | 364  | 0.3676        | 373  | 0.3625        | -    | -         |
| dfE42     | 1          | 11.3       | 365  | 0.3678        | 362  | 0.3544        | -    | -         |
| dfA11629  | 0          | 14.7       | 366  | 0.3685        | 367  | 0.3588        | 63   | 0.6051    |
| dfA9495   | 0          | 13.2       | 367  | 0.3702        | 372  | 0.3619        | -    | -         |
| dfA7171   | 0          | 14.4       | 368  | 0.3742        | 368  | 0.3603        | -    | -         |
| dfA4086   | 0          | 7.6        | 369  | 0.3750        | 374  | 0.3631        | -    | -         |
| dfA27003  | 0          | 10.4       | 370  | 0.3750        | 375  | 0.3636        | -    | -         |
| dfA8232   | 0          | 10.7       | 371  | 0.3751        | 377  | 0.3647        | 4    | 0.3473    |
| dfA12722  | 0          | 11.5       | 372  | 0.3757        | 393  | 0.3770        | -    | -         |
| dfA8766   | 0          | 14.1       | 373  | 0.3758        | 376  | 0.3643        | -    | -         |
| dfA37     | 0          | 2.6        | 374  | 0.3762        | 371  | 0.3614        | -    | -         |
| dfA17660  | 0          | 13.5       | 375  | 0.3767        | 379  | 0.3671        | -    | -         |
| dfA13554  | 0          | 14.3       | 376  | 0.3768        | 370  | 0.3610        | -    | -         |
| dfA8933   | 0          | 12.3       | 377  | 0.3770        | 383  | 0.3688        | 45   | 0.5363    |
| dfA12886  | 0          | 14         | 378  | 0.3771        | 397  | 0.3798        | -    | -         |
| dfA2772   | 0          | 5.1        | 379  | 0.3771        | 378  | 0.3668        | -    | -         |
| dfA11650  | 0          | 11.5       | 380  | 0.3774        | 381  | 0.3679        | -    | -         |
| dfA6251   | 0          | 14.6       | 381  | 0.3775        | 365  | 0.3562        | -    | -         |
| dfA16734  | 0          | 10.7       | 382  | 0.3776        | 364  | 0.3561        | -    | -         |
| dfA2657   | 1          | 12         | 383  | 0.3781        | 388  | 0.3714        | -    | -         |
| dfA15919  | 0          | 12.4       | 384  | 0.3785        | 369  | 0.3607        | 64   | 0.6070    |
| dfA5493   | 0          | 2.7        | 385  | 0.3789        | 392  | 0.3767        | 38   | 0.4973    |
| dfA25009  | 0          | 6.3        | 386  | 0.3796        | 382  | 0.3682        | -    | -         |
| dfA3678   | 0          | 11.9       | 387  | 0.3800        | 384  | 0.3692        | -    | -         |
| dfA23640  | 0          | 5.2        | 388  | 0.3814        | 390  | 0.3732        | -    | -         |
| dfA16184  | 0          | 8.8        | 389  | 0.3815        | 385  | 0.3692        | 56   | 0.5748    |
| dfA26566  | 0          | 10.9       | 390  | 0.3819        | 395  | 0.3786        | -    | -         |
| dfA550    | 0          | 5.3        | 391  | 0.3830        | 394  | 0.3785        | -    | -         |
| dfA3431   | 0          | 8.5        | 392  | 0.3834        | 380  | 0.3679        | -    | -         |
| dfA13285  | 0          | 11.8       | 393  | 0.3844        | 389  | 0.3732        | -    | -         |
| dfA3640   | 0          | 13.3       | 394  | 0.3852        | 391  | 0.3762        | -    | -         |
| dfA802    | 0          | 7.5        | 395  | 0.3892        | 387  | 0.3712        | -    | -         |
| dfA7313   | 0          | 14.8       | 396  | 0.3904        | 398  | 0.3806        | -    | -         |

continued...

| structure | duplicates | $\Delta H$ | rank | VC-xPWDF (3h) | rank | VC-xPWDF (2m) | rank | autoFIDEL |
|-----------|------------|------------|------|---------------|------|---------------|------|-----------|
| dfA2726   | 0          | 9.9        | 397  | 0.3911        | 386  | 0.3698        | -    | -         |
| dfA14215  | 0          | 10.3       | 398  | 0.3926        | 406  | 0.3887        | -    | -         |
| dfA3074   | 0          | 12         | 399  | 0.3936        | 405  | 0.3885        | -    | -         |
| dfA9313   | 0          | 9.6        | 400  | 0.3945        | 410  | 0.3901        | -    | -         |
| dfA14443  | 0          | 14         | 401  | 0.3952        | 404  | 0.3884        | -    | -         |
| dfA9946   | 0          | 12.1       | 402  | 0.3953        | 401  | 0.3837        | -    | -         |
| dfA14781  | 0          | 7.3        | 403  | 0.3956        | 396  | 0.3791        | -    | -         |
| dfA1979   | 0          | 7.7        | 404  | 0.3964        | 407  | 0.3888        | -    | -         |
| dfA729    | 0          | 7.8        | 405  | 0.3968        | 415  | 0.3932        | -    | -         |
| dfA8421   | 0          | 12.3       | 406  | 0.3971        | 402  | 0.3861        | -    | -         |
| dfA20663  | 0          | 8.6        | 407  | 0.3974        | 411  | 0.3913        | -    | -         |
| dfA3535   | 0          | 10.6       | 408  | 0.3993        | 403  | 0.3880        | -    | -         |
| dfA17246  | 0          | 11.8       | 409  | 0.4001        | 399  | 0.3814        | -    | -         |
| dfA10106  | 0          | 14.2       | 410  | 0.4002        | 400  | 0.3815        | -    | -         |
| dfA12550  | 0          | 13.5       | 411  | 0.4009        | 427  | 0.3999        | -    | -         |
| dfA3686   | 0          | 11         | 412  | 0.4010        | 412  | 0.3917        | -    | -         |
| dfA1765   | 1          | 4.1        | 413  | 0.4013        | 408  | 0.3890        | -    | -         |
| dfA1495   | 1          | 8.8        | 414  | 0.4015        | 418  | 0.3940        | -    | -         |
| dfA19043  | 0          | 13         | 415  | 0.4051        | 417  | 0.3940        | -    | -         |
| dfA3556   | 0          | 10.3       | 416  | 0.4057        | 446  | 0.4137        | -    | -         |
| dfA25387  | 0          | 9.9        | 417  | 0.4057        | 419  | 0.3942        | -    | -         |
| dfA1192   | 0          | 8.1        | 418  | 0.4074        | 422  | 0.3978        | -    | -         |
| dfA16559  | 0          | 14.6       | 419  | 0.4076        | 414  | 0.3923        | -    | -         |
| dfA1896   | 0          | 8.7        | 420  | 0.4084        | 416  | 0.3938        | -    | -         |
| dfA18606  | 0          | 14.1       | 421  | 0.4095        | 433  | 0.4036        | -    | -         |
| dfA14981  | 0          | 15         | 422  | 0.4096        | 409  | 0.3891        | -    | -         |
| HXACAN47  | -          | -          | 423  | 0.4099        | 423  | 0.3988        | -    | -         |
| dfA15652  | 0          | 13.1       | 424  | 0.4106        | 413  | 0.3918        | -    | -         |
| dfA651    | 0          | 7.2        | 425  | 0.4107        | 425  | 0.3991        | -    | -         |
| dfA5772   | 0          | 6.8        | 426  | 0.4107        | 430  | 0.4024        | 33   | 0.4865    |
| dfA5920   | 0          | 10.4       | 427  | 0.4124        | 432  | 0.4033        | -    | -         |
| dfA11215  | 0          | 13.9       | 428  | 0.4126        | 420  | 0.3973        | -    | -         |
| dfA8385   | 0          | 10.6       | 429  | 0.4136        | 426  | 0.3992        | -    | -         |
| dfA15005  | 0          | 14.4       | 430  | 0.4141        | 435  | 0.4072        | -    | -         |
| dfA4881   | 0          | 11.7       | 431  | 0.4142        | 436  | 0.4080        | -    | -         |
| dfA5279   | 0          | 11.7       | 432  | 0.4145        | 429  | 0.4011        | -    | -         |
| dfA12338  | 0          | 10.7       | 433  | 0.4146        | 421  | 0.3974        | 3    | 0.3322    |
| dfA5592   | 0          | 4.9        | 434  | 0.4164        | 424  | 0.3990        | -    | -         |
| dfA18430  | 0          | 5.6        | 435  | 0.4166        | 431  | 0.4029        | 9    | 0.3704    |
| dfA1409   | 0          | 8.1        | 436  | 0.4168        | 428  | 0.4006        | -    | -         |
| dfA11846  | 0          | 13.6       | 437  | 0.4175        | 443  | 0.4130        | -    | -         |
| dfA3242   | 0          | 7.6        | 438  | 0.4203        | 454  | 0.4167        | -    | -         |
| dfA17125  | 0          | 8.5        | 439  | 0.4209        | 438  | 0.4095        | -    | -         |
| dfA26797  | 0          | 8.3        | 440  | 0.4209        | 449  | 0.4145        | -    | -         |

continued...

| structure | duplicates | $\Delta H$ | rank | VC-xPWDF (3h) | rank | VC-xPWDF (2m) | rank | autoFIDEL |
|-----------|------------|------------|------|---------------|------|---------------|------|-----------|
| dfA25463  | 0          | 12.5       | 441  | 0.4210        | 448  | 0.4142        | -    | -         |
| dfA19942  | 0          | 6.2        | 442  | 0.4213        | 441  | 0.4125        | -    | -         |
| dfA2047   | 0          | 10.1       | 443  | 0.4232        | 444  | 0.4131        | -    | -         |
| dfA12490  | 0          | 12.9       | 444  | 0.4244        | 445  | 0.4134        | -    | -         |
| dfA6550   | 0          | 14.9       | 445  | 0.4248        | 434  | 0.4065        | -    | -         |
| dfA1577   | 0          | 11.3       | 446  | 0.4248        | 437  | 0.4087        | -    | -         |
| dfA18844  | 0          | 11.5       | 447  | 0.4251        | 456  | 0.4189        | -    | -         |
| dfA2608   | 0          | 13.4       | 448  | 0.4259        | 450  | 0.4146        | -    | -         |
| dfA4696   | 0          | 14.3       | 449  | 0.4262        | 451  | 0.4155        | -    | -         |
| dfA5291   | 0          | 9.2        | 450  | 0.4284        | 442  | 0.4129        | -    | -         |
| dfA2029   | 0          | 10         | 451  | 0.4285        | 440  | 0.4120        | -    | -         |
| dfA3040   | 0          | 7.4        | 452  | 0.4288        | 447  | 0.4137        | -    | -         |
| dfA9421   | 0          | 10.6       | 453  | 0.4298        | 488  | 0.4380        | -    | -         |
| dfA3577   | 0          | 12.8       | 454  | 0.4299        | 452  | 0.4159        | -    | -         |
| dfA5887   | 0          | 14.4       | 455  | 0.4300        | 439  | 0.4104        | -    | -         |
| dfA4976   | 0          | 9.5        | 456  | 0.4309        | 453  | 0.4162        | 69   | 0.6483    |
| dfA5351   | 0          | 10.5       | 457  | 0.4313        | 459  | 0.4211        | -    | -         |
| dfA5866   | 0          | 14.9       | 458  | 0.4313        | 457  | 0.4189        | -    | -         |
| dfA8262   | 0          | 13.5       | 459  | 0.4322        | 475  | 0.4329        | -    | -         |
| dfA19020  | 0          | 13.8       | 460  | 0.4324        | 469  | 0.4294        | 66   | 0.6151    |
| dfA7051   | 0          | 7.1        | 461  | 0.4326        | 464  | 0.4253        | 61   | 0.5869    |
| dfA11014  | 0          | 15         | 462  | 0.4340        | 458  | 0.4195        | -    | -         |
| dfA4615   | 0          | 8.8        | 463  | 0.4341        | 468  | 0.4293        | -    | -         |
| dfA3996   | 0          | 6.6        | 464  | 0.4352        | 463  | 0.4241        | -    | -         |
| dfA11866  | 0          | 9.9        | 465  | 0.4357        | 467  | 0.4286        | 17   | 0.4237    |
| dfA7923   | 0          | 15         | 466  | 0.4360        | 465  | 0.4256        | -    | -         |
| dfA20819  | 0          | 9.7        | 467  | 0.4362        | 455  | 0.4177        | -    | -         |
| dfA7011   | 0          | 13.4       | 468  | 0.4374        | 470  | 0.4295        | -    | -         |
| dfA27149  | 0          | 5.7        | 469  | 0.4379        | 461  | 0.4235        | -    | -         |
| dfA3990   | 0          | 11.7       | 470  | 0.4383        | 460  | 0.4217        | -    | -         |
| dfA12796  | 0          | 10.7       | 471  | 0.4386        | 477  | 0.4336        | -    | -         |
| dfA1936   | 0          | 11.7       | 472  | 0.4398        | 466  | 0.4256        | -    | -         |
| dfA17220  | 0          | 14.5       | 473  | 0.4422        | 471  | 0.4304        | -    | -         |
| dfA6496   | 0          | 10.6       | 474  | 0.4426        | 478  | 0.4340        | -    | -         |
| dfA3528   | 0          | 10.7       | 475  | 0.4431        | 462  | 0.4239        | -    | -         |
| dfA6121   | 0          | 9.4        | 476  | 0.4432        | 490  | 0.4391        | -    | -         |
| dfA4712   | 0          | 9.5        | 477  | 0.4436        | 489  | 0.4390        | -    | -         |
| dfA13752  | 0          | 10.8       | 478  | 0.4438        | 474  | 0.4323        | -    | -         |
| dfA20958  | 0          | 14.5       | 479  | 0.4442        | 482  | 0.4356        | -    | -         |
| dfA2393   | 0          | 6.3        | 480  | 0.4444        | 483  | 0.4362        | -    | -         |
| dfA13845  | 0          | 9.5        | 481  | 0.4444        | 473  | 0.4323        | -    | -         |
| dfA1916   | 0          | 8.6        | 482  | 0.4451        | 472  | 0.4312        | -    | -         |
| dfA733    | 0          | 7.4        | 483  | 0.4453        | 480  | 0.4351        | -    | -         |
| dfA11068  | 0          | 13.6       | 484  | 0.4472        | 481  | 0.4352        | -    | -         |

continued...

| structure | duplicates | $\Delta H$ | rank | VC-xPWDF (3h) | rank | VC-xPWDF (2m) | rank | autoFIDEL |
|-----------|------------|------------|------|---------------|------|---------------|------|-----------|
| dfA17292  | 0          | 6          | 485  | 0.4477        | 476  | 0.4333        | 37   | 0.4967    |
| dfA5359   | 0          | 9.3        | 486  | 0.4479        | 494  | 0.4440        | -    | -         |
| dfA3952   | 0          | 13.2       | 487  | 0.4481        | 486  | 0.4368        | -    | -         |
| dfA4709   | 0          | 10.2       | 488  | 0.4491        | 509  | 0.4531        | -    | -         |
| dfA3252   | 0          | 8.3        | 489  | 0.4499        | 496  | 0.4447        | -    | -         |
| dfA4093   | 0          | 11.4       | 490  | 0.4511        | 484  | 0.4365        | 28   | 0.4761    |
| dfA5135   | 0          | 7.3        | 491  | 0.4513        | 491  | 0.4410        | -    | -         |
| dfA8783   | 0          | 11.8       | 492  | 0.4530        | 497  | 0.4448        | -    | -         |
| dfA3249   | 0          | 14.1       | 493  | 0.4534        | 479  | 0.4350        | -    | -         |
| dfA9137   | 0          | 13.4       | 494  | 0.4536        | 498  | 0.4449        | -    | -         |
| dfA3849   | 0          | 12.1       | 495  | 0.4540        | 499  | 0.4460        | 39   | 0.4994    |
| dfA8556   | 0          | 10.7       | 496  | 0.4547        | 506  | 0.4504        | -    | -         |
| dfA2510   | 0          | 8.7        | 497  | 0.4549        | 487  | 0.4374        | -    | -         |
| dfA9113   | 0          | 8.7        | 498  | 0.4557        | 493  | 0.4423        | 10   | 0.3782    |
| dfA4830   | 0          | 11         | 499  | 0.4571        | 492  | 0.4414        | 41   | 0.5205    |
| dfA1976   | 0          | 9          | 500  | 0.4572        | 485  | 0.4367        | -    | -         |
| dfA3309   | 0          | 6.8        | 501  | 0.4589        | 501  | 0.4472        | -    | -         |
| dfA3361   | 0          | 9.3        | 502  | 0.4591        | 504  | 0.4491        | -    | -         |
| dfA10870  | 0          | 14.6       | 503  | 0.4616        | 505  | 0.4503        | -    | -         |
| dfA4017   | 0          | 10.4       | 504  | 0.4622        | 507  | 0.4507        | -    | -         |
| dfA6338   | 0          | 14.7       | 505  | 0.4622        | 500  | 0.4462        | 57   | 0.5763    |
| dfA5728   | 0          | 12.6       | 506  | 0.4623        | 503  | 0.4483        | -    | -         |
| dfA2482   | 0          | 13.9       | 507  | 0.4632        | 511  | 0.4545        | -    | -         |
| dfA10717  | 0          | 13.2       | 508  | 0.4637        | 495  | 0.4445        | -    | -         |
| dfA2356   | 0          | 10.7       | 509  | 0.4639        | 510  | 0.4534        | -    | -         |
| dfA18311  | 0          | 13.7       | 510  | 0.4641        | 524  | 0.4690        | -    | -         |
| dfA2255   | 0          | 10.1       | 511  | 0.4655        | 516  | 0.4614        | -    | -         |
| dfA17430  | 0          | 11.8       | 512  | 0.4681        | 512  | 0.4564        | -    | -         |
| dfA10530  | 0          | 10.2       | 513  | 0.4684        | 508  | 0.4510        | -    | -         |
| dfA2776   | 0          | 9.7        | 514  | 0.4685        | 521  | 0.4662        | -    | -         |
| dfA8479   | 0          | 14.7       | 515  | 0.4687        | 502  | 0.4479        | 68   | 0.6212    |
| dfA12415  | 0          | 10.1       | 516  | 0.4692        | 513  | 0.4579        | -    | -         |
| dfA2988   | 0          | 11         | 517  | 0.4712        | 517  | 0.4617        | -    | -         |
| dfA14180  | 0          | 14.3       | 518  | 0.4749        | 514  | 0.4584        | -    | -         |
| dfA870    | 0          | 8.5        | 519  | 0.4751        | 518  | 0.4621        | -    | -         |
| dfA17318  | 0          | 9.6        | 520  | 0.4753        | 529  | 0.4726        | -    | -         |
| dfA6186   | 0          | 8.9        | 521  | 0.4760        | 515  | 0.4597        | -    | -         |
| dfA14953  | 0          | 8.2        | 522  | 0.4779        | 519  | 0.4640        | -    | -         |
| dfA10943  | 0          | 4.4        | 523  | 0.4806        | 522  | 0.4688        | -    | -         |
| dfA8629   | 0          | 13.3       | 524  | 0.4810        | 520  | 0.4658        | -    | -         |
| dfA2314   | 0          | 8.1        | 525  | 0.4825        | 527  | 0.4699        | 49   | 0.5484    |
| dfA847    | 0          | 7.8        | 526  | 0.4830        | 526  | 0.4696        | 42   | 0.5236    |
| dfA3487   | 0          | 14         | 527  | 0.4843        | 535  | 0.4774        | -    | -         |
| dfA416    | 0          | 7.1        | 528  | 0.4843        | 525  | 0.4691        | 48   | 0.5480    |

continued...

| structure | duplicates | $\Delta H$ | rank | VC-xPWDF (3h) | rank | VC-xPWDF (2m) | rank | autoFIDEL |
|-----------|------------|------------|------|---------------|------|---------------|------|-----------|
| dfA14701  | 0          | 14.2       | 529  | 0.4850        | 531  | 0.4762        | -    | -         |
| dfA10318  | 0          | 12.8       | 530  | 0.4850        | 523  | 0.4688        | -    | -         |
| dfA3548   | 0          | 11.6       | 531  | 0.4863        | 528  | 0.4712        | -    | -         |
| dfA8297   | 0          | 13         | 532  | 0.4878        | 530  | 0.4742        | -    | -         |
| dfA1120   | 0          | 9.1        | 533  | 0.4884        | 536  | 0.4784        | -    | -         |
| dfA11097  | 0          | 14.1       | 534  | 0.4909        | 534  | 0.4772        | -    | -         |
| dfA4697   | 0          | 9.3        | 535  | 0.4914        | 532  | 0.4763        | -    | -         |
| dfA13132  | 0          | 13.8       | 536  | 0.4918        | 537  | 0.4806        | -    | -         |
| dfA2861   | 0          | 12.7       | 537  | 0.4921        | 539  | 0.4814        | -    | -         |
| dfA2092   | 1          | 7.5        | 538  | 0.4926        | 533  | 0.4769        | -    | -         |
| dfA10841  | 0          | 8.4        | 539  | 0.4928        | 540  | 0.4836        | 51   | 0.5572    |
| dfA23620  | 0          | 14.6       | 540  | 0.4931        | 538  | 0.4811        | -    | -         |
| dfA12362  | 0          | 13.3       | 541  | 0.4932        | 541  | 0.4840        | -    | -         |
| dfA25928  | 0          | 12         | 542  | 0.4947        | 545  | 0.4918        | 43   | 0.5247    |
| dfA2869   | 0          | 11.6       | 543  | 0.4962        | 543  | 0.4858        | -    | -         |
| dfA8844   | 0          | 12         | 544  | 0.4974        | 542  | 0.4841        | -    | -         |
| dfA7152   | 0          | 10.1       | 545  | 0.5043        | 546  | 0.4928        | -    | -         |
| dfA20001  | 0          | 8.7        | 546  | 0.5044        | 544  | 0.4883        | -    | -         |
| dfA7651   | 0          | 15         | 547  | 0.5084        | 549  | 0.4992        | -    | -         |
| dfA3270   | 0          | 7.9        | 548  | 0.5112        | 550  | 0.5002        | -    | -         |
| dfA11582  | 0          | 14.7       | 549  | 0.5117        | 556  | 0.5154        | -    | -         |
| dfA26696  | 0          | 12.8       | 550  | 0.5136        | 547  | 0.4965        | -    | -         |
| dfA826    | 0          | 8.5        | 551  | 0.5149        | 548  | 0.4972        | -    | -         |
| dfA1200   | 0          | 8.1        | 552  | 0.5151        | 552  | 0.5069        | -    | -         |
| dfA4489   | 0          | 8.6        | 553  | 0.5163        | 551  | 0.5038        | -    | -         |
| dfA9109   | 0          | 10.9       | 554  | 0.5213        | 553  | 0.5078        | -    | -         |
| dfA1099   | 0          | 9.1        | 555  | 0.5223        | 555  | 0.5145        | -    | -         |
| dfA7915   | 0          | 8.4        | 556  | 0.5248        | 554  | 0.5131        | -    | -         |
| dfA12754  | 0          | 13.3       | 557  | 0.5276        | 565  | 0.5263        | -    | -         |
| dfA11788  | 0          | 11.8       | 558  | 0.5279        | 558  | 0.5163        | 62   | 0.5919    |
| dfA11055  | 0          | 12.9       | 559  | 0.5313        | 573  | 0.5347        | -    | -         |
| dfA21086  | 0          | 11.7       | 560  | 0.5316        | 560  | 0.5207        | -    | -         |
| dfA1342   | 0          | 13.8       | 561  | 0.5318        | 564  | 0.5259        | -    | -         |
| dfA23256  | 0          | 12.2       | 562  | 0.5319        | 567  | 0.5281        | -    | -         |
| dfA8508   | 0          | 14.5       | 563  | 0.5325        | 557  | 0.5154        | -    | -         |
| dfA20949  | 0          | 13         | 564  | 0.5335        | 559  | 0.5205        | -    | -         |
| dfA14349  | 0          | 14.4       | 565  | 0.5339        | 575  | 0.5369        | -    | -         |
| dfA4951   | 0          | 9          | 566  | 0.5375        | 571  | 0.5308        | -    | -         |
| dfA12229  | 0          | 13.9       | 567  | 0.5381        | 568  | 0.5286        | -    | -         |
| dfA5462   | 0          | 12.8       | 568  | 0.5382        | 562  | 0.5227        | 59   | 0.5826    |
| dfA4564   | 0          | 10.1       | 569  | 0.5382        | 563  | 0.5248        | -    | -         |
| dfA13173  | 0          | 9.1        | 570  | 0.5388        | 570  | 0.5306        | -    | -         |
| dfA3589   | 0          | 10         | 571  | 0.5400        | 561  | 0.5224        | -    | -         |
| dfA11471  | 0          | 12.4       | 572  | 0.5411        | 566  | 0.5275        | -    | -         |

continued...



| structure | duplicates | $\Delta H$ | rank | VC-xPWDF (3h) | rank | VC-xPWDF (2m) | rank | autoFIDEL |
|-----------|------------|------------|------|---------------|------|---------------|------|-----------|
| dfA9578   | 0          | 12.5       | 573  | 0.5420        | 576  | 0.5376        | -    | -         |
| dfA9967   | 0          | 12.9       | 574  | 0.5441        | 569  | 0.5296        | -    | -         |
| dfA7902   | 0          | 12.7       | 575  | 0.5442        | 577  | 0.5377        | -    | -         |
| dfA4545   | 0          | 9.6        | 576  | 0.5444        | 572  | 0.5308        | -    | -         |
| dfA530    | 0          | 7.9        | 577  | 0.5456        | 578  | 0.5401        | 19   | 0.4304    |
| dfA13160  | 0          | 8.3        | 578  | 0.5468        | 580  | 0.5409        | -    | -         |
| dfA5868   | 0          | 13.6       | 579  | 0.5472        | 574  | 0.5349        | -    | -         |
| dfA14674  | 0          | 9.6        | 580  | 0.5498        | 583  | 0.5443        | -    | -         |
| dfA12505  | 0          | 8.5        | 581  | 0.5508        | 579  | 0.5403        | -    | -         |
| dfA1412   | 0          | 8.8        | 582  | 0.5536        | 581  | 0.5410        | 53   | 0.5638    |
| dfA3375   | 0          | 8.6        | 583  | 0.5545        | 585  | 0.5486        | -    | -         |
| dfA25959  | 0          | 12.9       | 584  | 0.5630        | 586  | 0.5508        | -    | -         |
| dfA2467   | 0          | 8.2        | 585  | 0.5631        | 584  | 0.5473        | -    | -         |
| dfA2159   | 0          | 10         | 586  | 0.5634        | 589  | 0.5521        | -    | -         |
| dfA6455   | 0          | 13.9       | 587  | 0.5641        | 591  | 0.5568        | -    | -         |
| dfA4860   | 0          | 8.5        | 588  | 0.5651        | 582  | 0.5439        | -    | -         |
| dfA8206   | 0          | 11.7       | 589  | 0.5683        | 587  | 0.5516        | -    | -         |
| dfA11819  | 0          | 14.8       | 590  | 0.5683        | 590  | 0.5556        | -    | -         |
| dfA25337  | 0          | 10.8       | 591  | 0.5706        | 598  | 0.5662        | -    | -         |
| dfA4733   | 0          | 11.5       | 592  | 0.5716        | 588  | 0.5519        | -    | -         |
| dfE3      | 1          | 2.6        | 593  | 0.5732        | 592  | 0.5574        | -    | -         |
| dfA2842   | 0          | 10.6       | 594  | 0.5753        | 599  | 0.5676        | -    | -         |
| dfA2661   | 0          | 9.9        | 595  | 0.5758        | 593  | 0.5585        | -    | -         |
| dfA8552   | 0          | 7.4        | 596  | 0.5759        | 597  | 0.5662        | -    | -         |
| HXACAN40  | -          | -          | 597  | 0.5764        | 596  | 0.5618        | -    | -         |
| dfA7472   | 0          | 14.6       | 598  | 0.5766        | 595  | 0.5600        | -    | -         |
| dfA8143   | 0          | 14.1       | 599  | 0.5766        | 600  | 0.5693        | -    | -         |
| dfA2860   | 0          | 7.2        | 600  | 0.5795        | 594  | 0.5597        | 23   | 0.4559    |
| dfA15668  | 0          | 14.8       | 601  | 0.5805        | 603  | 0.5775        | -    | -         |
| dfA8301   | 0          | 8.4        | 602  | 0.5841        | 602  | 0.5757        | -    | -         |
| dfA6433   | 1          | 7.7        | 603  | 0.5878        | 601  | 0.5716        | -    | -         |
| dfA9499   | 0          | 8.8        | 604  | 0.5895        | 605  | 0.5811        | -    | -         |
| dfA6443   | 0          | 11.1       | 605  | 0.5897        | 606  | 0.5824        | -    | -         |
| dfA13568  | 0          | 14.8       | 606  | 0.5906        | 607  | 0.5832        | -    | -         |
| dfA5244   | 0          | 11.3       | 607  | 0.5928        | 609  | 0.5880        | -    | -         |
| dfA21905  | 0          | 13.3       | 608  | 0.5975        | 604  | 0.5809        | 70   | 0.6504    |
| dfA1914   | 0          | 8.6        | 609  | 0.5979        | 608  | 0.5863        | -    | -         |
| dfA22709  | 0          | 14.1       | 610  | 0.6016        | 610  | 0.5943        | -    | -         |
| dfA668    | 0          | 7.3        | 611  | 0.6022        | 611  | 0.5973        | -    | -         |
| dfA1036   | 0          | 7.7        | 612  | 0.6064        | 614  | 0.6024        | -    | -         |
| dfA3746   | 0          | 10.6       | 613  | 0.6088        | 612  | 0.5984        | -    | -         |
| dfA7007   | 0          | 11.5       | 614  | 0.6118        | 613  | 0.6015        | -    | -         |
| dfA5216   | 0          | 11         | 615  | 0.6147        | 615  | 0.6025        | -    | -         |
| dfA24973  | 1          | 11         | 616  | 0.6175        | 616  | 0.6053        | -    | -         |

continued...

| structure | duplicates | $\Delta H$ | rank | VC-xPWDF (3h) | rank | VC-xPWDF (2m) | rank | autoFIDEL |
|-----------|------------|------------|------|---------------|------|---------------|------|-----------|
| dfA5503   | 0          | 13.8       | 617  | 0.6253        | 617  | 0.6081        | -    | -         |
| dfA12946  | 0          | 7.6        | 618  | 0.6271        | 618  | 0.6103        | -    | -         |
| dfA9901   | 0          | 13.5       | 619  | 0.6278        | 621  | 0.6324        | -    | -         |
| dfA2600   | 0          | 10.4       | 620  | 0.6292        | 620  | 0.6244        | -    | -         |
| dfA11704  | 0          | 11.1       | 621  | 0.6297        | 619  | 0.6177        | -    | -         |
| dfA1560   | 0          | 12         | 622  | 0.6554        | 623  | 0.6370        | -    | -         |
| dfA11850  | 0          | 14.7       | 623  | 0.6558        | 622  | 0.6330        | -    | -         |
| dfA241    | 1          | 3.6        | 624  | 0.6620        | 624  | 0.6464        | -    | -         |
| dfA9908   | 0          | 6          | 625  | 0.6709        | 625  | 0.6522        | -    | -         |
| dfA2750   | 0          | 12         | 626  | 0.7216        | 626  | 0.7024        | -    | -         |
| dfA671    | 0          | 8.1        | 627  | 0.7260        | 627  | 0.7055        | -    | -         |
| HXACAN33  | -          | -          | 628  | 0.7293        | 628  | 0.7139        | -    | -         |
| dfA2286   | 0          | 12.2       | 629  | 0.7434        | 629  | 0.7247        | -    | -         |

Table S12: Summary of data for D-mannitol. Relative enthalpy is given in kJ/mol, ranks are according to the next-right column, autoFIDEL comparisons were made with the default program parameters and the experimental powder diffractograms collected over 3 hrs.

| structure | duplicates | $\Delta H$ | rank | VC-xPWDF (3h) | rank | VC-xPWDF (2m) | rank | autoFIDEL |
|-----------|------------|------------|------|---------------|------|---------------|------|-----------|
| DMANTL15  | -          | -          | 1    | 0.0962        | 1    | 0.0914        | -    | -         |
| DMANTL07  | -          | -          | 2    | 0.0992        | 2    | 0.0946        | 1    | 0.1136    |
| d9_af92   | 0          | 80.3       | 3    | 0.1573        | 3    | 0.1574        | 6    | 0.3718    |
| d10_au101 | 0          | 101.9      | 4    | 0.1756        | 4    | 0.1734        | -    | -         |
| dl_au92   | 0          | 98.3       | 5    | 0.1771        | 5    | 0.1748        | -    | -         |
| d10_aa58  | 0          | 91.3       | 6    | 0.1797        | 6    | 0.1798        | -    | -         |
| d9_db59   | 0          | 69.8       | 7    | 0.1832        | 7    | 0.1808        | -    | -         |
| d9_ah99   | 0          | 80.4       | 8    | 0.1856        | 8    | 0.1827        | -    | -         |
| dl_aa111  | 1          | 86.4       | 9    | 0.1897        | 9    | 0.1894        | -    | -         |
| d9_aq27   | 0          | 79         | 10   | 0.2032        | 10   | 0.1969        | -    | -         |
| d9_ah33   | 0          | 81.9       | 11   | 0.2126        | 11   | 0.2087        | -    | -         |
| dl_aa79   | 1          | 87.7       | 12   | 0.2184        | 12   | 0.2141        | 27   | 0.5903    |
| d10_aa91  | 1          | 92.4       | 13   | 0.2186        | 13   | 0.2147        | -    | -         |
| d9_ap33   | 0          | 80.5       | 14   | 0.2292        | 14   | 0.2217        | -    | -         |
| dl_af95   | 0          | 90.6       | 15   | 0.2310        | 15   | 0.2249        | -    | -         |
| d9_ah129  | 1          | 64.4       | 16   | 0.2319        | 17   | 0.2287        | -    | -         |
| d9_db92   | 0          | 80.1       | 17   | 0.2329        | 16   | 0.2261        | -    | -         |
| d10_af10  | 0          | 95.9       | 18   | 0.2358        | 18   | 0.2301        | -    | -         |
| dl_af12   | 0          | 87.8       | 19   | 0.2387        | 19   | 0.2345        | -    | -         |
| d9_ap24   | 0          | 75         | 20   | 0.2430        | 20   | 0.2365        | -    | -         |
| d8_af44   | 1          | 29.4       | 21   | 0.2502        | 21   | 0.2455        | -    | -         |
| d9_ah19   | 0          | 75.7       | 22   | 0.2530        | 22   | 0.2505        | -    | -         |
| d10_af49  | 1          | 90.4       | 23   | 0.2556        | 24   | 0.2512        | -    | -         |
| d9_aq42   | 0          | 76.4       | 24   | 0.2557        | 23   | 0.2508        | -    | -         |
| dl_ah27   | 0          | 95         | 25   | 0.2762        | 25   | 0.2708        | -    | -         |
| d9_av23   | 0          | 74.2       | 26   | 0.2771        | 27   | 0.2737        | 3    | 0.3058    |
| dl_au68   | 0          | 99.7       | 27   | 0.2794        | 26   | 0.2724        | -    | -         |
| d9_aa21   | 0          | 80.1       | 28   | 0.2818        | 29   | 0.2754        | -    | -         |
| d8_au58   | 0          | 25.1       | 29   | 0.2819        | 28   | 0.2742        | 18   | 0.5152    |
| d10_af41  | 0          | 101.3      | 30   | 0.2839        | 31   | 0.2792        | -    | -         |
| dl_ah48   | 0          | 94.1       | 31   | 0.2851        | 30   | 0.2764        | -    | -         |
| d9_aq55   | 1          | 68.8       | 32   | 0.2865        | 32   | 0.2811        | -    | -         |
| d9_ay20   | 0          | 82.8       | 33   | 0.2892        | 33   | 0.2826        | -    | -         |
| d9_cb92   | 0          | 77.1       | 34   | 0.2902        | 34   | 0.2833        | -    | -         |
| d8_aa5    | 2          | 27         | 35   | 0.2904        | 36   | 0.2846        | -    | -         |
| d10_ay33  | 0          | 94.9       | 36   | 0.2916        | 35   | 0.2843        | -    | -         |
| dl_ay44   | 1          | 91.1       | 37   | 0.2927        | 37   | 0.2854        | -    | -         |
| d10_cb142 | 0          | 100.1      | 38   | 0.2938        | 39   | 0.2900        | -    | -         |
| d10_aa19  | 1          | 82.9       | 39   | 0.2971        | 38   | 0.2877        | -    | -         |
| d9_cb138  | 0          | 80.3       | 40   | 0.2978        | 40   | 0.2901        | -    | -         |
| d10_ah7   | 0          | 100.2      | 41   | 0.3070        | 41   | 0.2977        | -    | -         |

continued...

| structure | duplicates | $\Delta H$ | rank | VC-xPWDF (3h) | rank | VC-xPWDF (2m) | rank | autoFIDEL |
|-----------|------------|------------|------|---------------|------|---------------|------|-----------|
| d8_as87   | 0          | 27.9       | 42   | 0.3111        | 42   | 0.3043        | -    | -         |
| d8_av23   | 0          | 21.7       | 43   | 0.3139        | 44   | 0.3082        | -    | -         |
| DMANTL08  | -          | -          | 44   | 0.3145        | 43   | 0.3060        | -    | -         |
| d9_aq136  | 0          | 77.2       | 45   | 0.3230        | 45   | 0.3127        | -    | -         |
| dl_ah89   | 0          | 90.5       | 46   | 0.3242        | 48   | 0.3197        | -    | -         |
| d8_au79   | 0          | 23         | 47   | 0.3242        | 46   | 0.3140        | -    | -         |
| dl_as76   | 0          | 94.8       | 48   | 0.3253        | 47   | 0.3168        | 10   | 0.4402    |
| dl_af33   | 1          | 98.4       | 49   | 0.3276        | 49   | 0.3215        | -    | -         |
| dl_ah97   | 0          | 84.3       | 50   | 0.3292        | 51   | 0.3225        | -    | -         |
| dl_au56   | 1          | 93.3       | 51   | 0.3294        | 50   | 0.3221        | -    | -         |
| dl_ap55   | 0          | 104.9      | 52   | 0.3311        | 55   | 0.3286        | -    | -         |
| dl_db31   | 2          | 96         | 53   | 0.3321        | 54   | 0.3285        | -    | -         |
| d8_aq89   | 1          | 10.5       | 54   | 0.3330        | 52   | 0.3232        | -    | -         |
| d10_ba65  | 0          | 88.5       | 55   | 0.3358        | 53   | 0.3284        | -    | -         |
| d9_ay85   | 0          | 79.3       | 56   | 0.3373        | 58   | 0.3333        | -    | -         |
| d9_ah76   | 0          | 78.6       | 57   | 0.3379        | 56   | 0.3310        | -    | -         |
| d9_ba75   | 0          | 75.1       | 58   | 0.3389        | 59   | 0.3345        | -    | -         |
| dl_ap52   | 0          | 86.1       | 59   | 0.3400        | 57   | 0.3323        | -    | -         |
| d10_ah90  | 0          | 89         | 60   | 0.3400        | 61   | 0.3351        | -    | -         |
| d10_af65  | 0          | 101.4      | 61   | 0.3420        | 62   | 0.3359        | -    | -         |
| d9_aq73   | 0          | 81.5       | 62   | 0.3422        | 60   | 0.3345        | -    | -         |
| d10_ah89  | 0          | 93.4       | 63   | 0.3437        | 63   | 0.3367        | -    | -         |
| d9_cd70   | 0          | 77.8       | 64   | 0.3449        | 64   | 0.3385        | -    | -         |
| d10_au64  | 0          | 99.6       | 65   | 0.3476        | 65   | 0.3409        | -    | -         |
| d9_af68   | 0          | 71.4       | 66   | 0.3479        | 66   | 0.3423        | -    | -         |
| d9_bd96   | 0          | 73.2       | 67   | 0.3489        | 68   | 0.3451        | -    | -         |
| d9_bh89   | 0          | 75.3       | 68   | 0.3522        | 67   | 0.3433        | -    | -         |
| d9_ay98   | 0          | 82.8       | 69   | 0.3545        | 74   | 0.3484        | -    | -         |
| d8_aq83   | 0          | 27.7       | 70   | 0.3559        | 72   | 0.3477        | -    | -         |
| dl_ay104  | 0          | 90.1       | 71   | 0.3560        | 71   | 0.3459        | -    | -         |
| dl_db92   | 0          | 101.2      | 72   | 0.3560        | 76   | 0.3499        | -    | -         |
| d8_ap93   | 0          | 17.9       | 73   | 0.3561        | 69   | 0.3452        | -    | -         |
| d9_cb118  | 0          | 81.4       | 74   | 0.3563        | 82   | 0.3561        | -    | -         |
| d9_aa60   | 0          | 77.8       | 75   | 0.3564        | 77   | 0.3521        | -    | -         |
| d10_ah86  | 0          | 95.5       | 76   | 0.3568        | 73   | 0.3480        | -    | -         |
| d8_az50   | 0          | 25         | 77   | 0.3572        | 70   | 0.3457        | 19   | 0.5326    |
| d10_az101 | 0          | 87.7       | 78   | 0.3587        | 75   | 0.3485        | -    | -         |
| dl_aa99   | 0          | 91.7       | 79   | 0.3590        | 81   | 0.3558        | -    | -         |
| d10_db23  | 0          | 103.2      | 80   | 0.3609        | 78   | 0.3541        | -    | -         |
| d9_ay59   | 0          | 71.4       | 81   | 0.3634        | 85   | 0.3580        | -    | -         |
| dl_aq19   | 0          | 91.3       | 82   | 0.3642        | 80   | 0.3549        | -    | -         |
| d9_aq60   | 0          | 81.3       | 83   | 0.3642        | 84   | 0.3572        | -    | -         |
| d10_ay116 | 0          | 100.5      | 84   | 0.3644        | 79   | 0.3548        | 9    | 0.4099    |
| d9_af15   | 0          | 81.3       | 85   | 0.3656        | 86   | 0.3590        | -    | -         |

continued...

| structure | duplicates | $\Delta H$ | rank | VC-xPWDF (3h) | rank | VC-xPWDF (2m) | rank | autoFIDEL |
|-----------|------------|------------|------|---------------|------|---------------|------|-----------|
| d9_aa26   | 0          | 82.6       | 86   | 0.3668        | 95   | 0.3664        | -    | -         |
| d9_az62   | 0          | 82.7       | 87   | 0.3669        | 83   | 0.3566        | -    | -         |
| dl_av59   | 1          | 93         | 88   | 0.3670        | 90   | 0.3620        | -    | -         |
| d9_af39   | 0          | 71.6       | 89   | 0.3680        | 89   | 0.3615        | -    | -         |
| d9_av107  | 0          | 76.7       | 90   | 0.3695        | 91   | 0.3621        | -    | -         |
| d9_cb65   | 0          | 77.6       | 91   | 0.3700        | 96   | 0.3674        | -    | -         |
| d10_av11  | 1          | 100.4      | 92   | 0.3707        | 94   | 0.3652        | -    | -         |
| d9_bb68   | 0          | 81.3       | 93   | 0.3717        | 87   | 0.3602        | -    | -         |
| d8_au41   | 0          | 26.2       | 94   | 0.3718        | 88   | 0.3603        | -    | -         |
| d10_aq81  | 0          | 93         | 95   | 0.3733        | 92   | 0.3628        | -    | -         |
| d9_av100  | 0          | 78.9       | 96   | 0.3734        | 98   | 0.3677        | -    | -         |
| dl_db35   | 1          | 89.4       | 97   | 0.3746        | 97   | 0.3675        | -    | -         |
| dl_aa46   | 2          | 83.9       | 98   | 0.3749        | 93   | 0.3641        | -    | -         |
| dl_af74   | 0          | 104.3      | 99   | 0.3765        | 100  | 0.3687        | 8    | 0.4036    |
| dl_as86   | 0          | 93.3       | 100  | 0.3770        | 101  | 0.3696        | -    | -         |
| d9_ba42   | 0          | 82.6       | 101  | 0.3777        | 102  | 0.3696        | -    | -         |
| d8_aq31   | 0          | 28.6       | 102  | 0.3780        | 103  | 0.3696        | -    | -         |
| d10_af78  | 0          | 100        | 103  | 0.3780        | 104  | 0.3707        | -    | -         |
| dl_aq131  | 0          | 90.7       | 104  | 0.3783        | 99   | 0.3681        | -    | -         |
| dl_as117  | 0          | 102.7      | 105  | 0.3789        | 107  | 0.3740        | -    | -         |
| dl_ay95   | 0          | 97.2       | 106  | 0.3809        | 110  | 0.3764        | -    | -         |
| d9_af10   | 0          | 72.2       | 107  | 0.3817        | 106  | 0.3734        | -    | -         |
| d9_ba81   | 0          | 82.1       | 108  | 0.3839        | 109  | 0.3744        | -    | -         |
| d10_bd34  | 1          | 101.5      | 109  | 0.3845        | 112  | 0.3783        | -    | -         |
| d9_az101  | 0          | 81.1       | 110  | 0.3853        | 108  | 0.3744        | -    | -         |
| d9_cd88   | 0          | 80.8       | 111  | 0.3857        | 119  | 0.3826        | -    | -         |
| d9_ae82   | 0          | 76         | 112  | 0.3858        | 111  | 0.3775        | -    | -         |
| dl_ae58   | 0          | 102.5      | 113  | 0.3859        | 105  | 0.3728        | -    | -         |
| dl_au89   | 0          | 96.4       | 114  | 0.3871        | 113  | 0.3808        | -    | -         |
| d9_ay2    | 0          | 69.6       | 115  | 0.3885        | 114  | 0.3812        | -    | -         |
| d9_av77   | 0          | 81.9       | 116  | 0.3892        | 124  | 0.3847        | -    | -         |
| dl_as108  | 0          | 86.8       | 117  | 0.3893        | 116  | 0.3823        | -    | -         |
| d10_as78  | 0          | 89.2       | 118  | 0.3898        | 118  | 0.3824        | -    | -         |
| dl_db48   | 0          | 100.6      | 119  | 0.3906        | 117  | 0.3823        | -    | -         |
| d10_ah15  | 0          | 103.2      | 120  | 0.3906        | 123  | 0.3845        | -    | -         |
| dl_ay80   | 0          | 98         | 121  | 0.3917        | 120  | 0.3836        | 14   | 0.4635    |
| dl_az85   | 0          | 85.7       | 122  | 0.3921        | 115  | 0.3818        | -    | -         |
| d9_aq87   | 0          | 75.6       | 123  | 0.3939        | 128  | 0.3880        | -    | -         |
| d9_az55   | 0          | 72.7       | 124  | 0.3939        | 121  | 0.3836        | -    | -         |
| dl_cb142  | 0          | 104.8      | 125  | 0.3940        | 129  | 0.3885        | -    | -         |
| d10_cb82  | 0          | 95.5       | 126  | 0.3946        | 130  | 0.3886        | 22   | 0.5664    |
| d8_ah80   | 0          | 28.1       | 127  | 0.3951        | 127  | 0.3876        | -    | -         |
| d9_bh54   | 0          | 77.9       | 128  | 0.3952        | 125  | 0.3858        | -    | -         |
| dl_bh101  | 1          | 101.9      | 129  | 0.3953        | 122  | 0.3841        | -    | -         |

continued...

| structure  | duplicates | $\Delta H$ | rank | VC-xPWDF (3h) | rank | VC-xPWDF (2m) | rank | autoFIDEL |
|------------|------------|------------|------|---------------|------|---------------|------|-----------|
| d10_ah27   | 0          | 84.9       | 130  | 0.3964        | 133  | 0.3913        | -    | -         |
| d10_cb137  | 0          | 96.1       | 131  | 0.3973        | 138  | 0.3935        | -    | -         |
| d9_db107   | 0          | 81.4       | 132  | 0.3977        | 126  | 0.3860        | -    | -         |
| d9_db8     | 0          | 77.7       | 133  | 0.3982        | 132  | 0.3911        | -    | -         |
| d9_as34    | 0          | 69         | 134  | 0.3986        | 131  | 0.3907        | -    | -         |
| d10_af59   | 0          | 87.3       | 135  | 0.3989        | 136  | 0.3915        | -    | -         |
| d9_as42    | 0          | 82.5       | 136  | 0.3989        | 146  | 0.3975        | -    | -         |
| d10_as58   | 0          | 92.8       | 137  | 0.3992        | 134  | 0.3914        | -    | -         |
| dl_ah88    | 0          | 81         | 138  | 0.4011        | 144  | 0.3958        | 28   | 0.5916    |
| dl_au38    | 1          | 98.3       | 139  | 0.4016        | 135  | 0.3915        | -    | -         |
| dl_ay6     | 0          | 93.5       | 140  | 0.4018        | 139  | 0.3936        | -    | -         |
| dl_aq66    | 0          | 86         | 141  | 0.4025        | 141  | 0.3948        | -    | -         |
| d10_az14   | 1          | 94.3       | 142  | 0.4036        | 147  | 0.3977        | -    | -         |
| d10_aq97   | 0          | 96.4       | 143  | 0.4041        | 140  | 0.3948        | -    | -         |
| d9_af95    | 0          | 77.5       | 144  | 0.4043        | 143  | 0.3956        | -    | -         |
| d9_ah36    | 0          | 80.4       | 145  | 0.4045        | 152  | 0.4007        | -    | -         |
| dl_cb152   | 0          | 101.2      | 146  | 0.4049        | 151  | 0.4002        | -    | -         |
| dl_bd53    | 1          | 95.5       | 147  | 0.4056        | 142  | 0.3954        | -    | -         |
| d9_aa106   | 1          | 80.9       | 148  | 0.4057        | 145  | 0.3962        | -    | -         |
| d9_bd48    | 1          | 80.2       | 149  | 0.4058        | 137  | 0.3926        | -    | -         |
| dl_db29    | 0          | 80.3       | 150  | 0.4060        | 148  | 0.3978        | -    | -         |
| dl_aq107   | 1          | 83.6       | 151  | 0.4081        | 150  | 0.3994        | -    | -         |
| d10_aq83   | 0          | 81.7       | 152  | 0.4081        | 149  | 0.3989        | -    | -         |
| dl_af108   | 0          | 97.7       | 153  | 0.4088        | 154  | 0.4027        | -    | -         |
| d10_aq89   | 0          | 88.2       | 154  | 0.4098        | 153  | 0.4020        | -    | -         |
| dl_cb76    | 0          | 93.8       | 155  | 0.4107        | 165  | 0.4070        | -    | -         |
| d9_cc103   | 0          | 66.7       | 156  | 0.4110        | 161  | 0.4064        | -    | -         |
| d10_bf56   | 1          | 99.7       | 157  | 0.4112        | 155  | 0.4036        | -    | -         |
| d9_ah86    | 0          | 76.3       | 158  | 0.4112        | 156  | 0.4044        | 12   | 0.4459    |
| dl_av75    | 0          | 98.3       | 159  | 0.4113        | 157  | 0.4047        | -    | -         |
| d9_db6     | 1          | 77.1       | 160  | 0.4129        | 158  | 0.4053        | -    | -         |
| dl_cb116   | 0          | 94.5       | 161  | 0.4144        | 166  | 0.4075        | -    | -         |
| dl_av110   | 0          | 102.1      | 162  | 0.4145        | 167  | 0.4081        | -    | -         |
| dl_cb46    | 0          | 101.2      | 163  | 0.4147        | 163  | 0.4066        | -    | -         |
| dl_cb19    | 0          | 97.9       | 164  | 0.4153        | 164  | 0.4069        | -    | -         |
| dl_cb105   | 0          | 88.2       | 165  | 0.4157        | 170  | 0.4096        | -    | -         |
| d9_av49    | 0          | 81         | 166  | 0.4158        | 178  | 0.4114        | -    | -         |
| dl_af60    | 0          | 81.6       | 167  | 0.4158        | 169  | 0.4084        | -    | -         |
| dl_aq60    | 0          | 103.2      | 168  | 0.4158        | 160  | 0.4063        | -    | -         |
| dl_bf50    | 0          | 81.6       | 169  | 0.4161        | 162  | 0.4064        | -    | -         |
| d9_ay29    | 0          | 81.2       | 170  | 0.4174        | 159  | 0.4053        | -    | -         |
| d10_ecod10 | 1          | 82.4       | 171  | 0.4175        | 168  | 0.4084        | -    | -         |
| d9_as115   | 0          | 81.3       | 172  | 0.4177        | 182  | 0.4140        | -    | -         |
| d10_cb84   | 0          | 102.2      | 173  | 0.4179        | 172  | 0.4099        | -    | -         |

continued...

| structure | duplicates | $\Delta H$ | rank | VC-xPWDF (3h) | rank | VC-xPWDF (2m) | rank | autoFIDEL |
|-----------|------------|------------|------|---------------|------|---------------|------|-----------|
| d9_ba16   | 1          | 74.5       | 174  | 0.4182        | 179  | 0.4117        | -    | -         |
| dl_ay67   | 1          | 96.1       | 175  | 0.4193        | 171  | 0.4098        | -    | -         |
| d9_ap106  | 0          | 82.3       | 176  | 0.4194        | 177  | 0.4110        | -    | -         |
| d10_cb121 | 0          | 98.3       | 177  | 0.4201        | 181  | 0.4129        | -    | -         |
| dl_as101  | 0          | 94.2       | 178  | 0.4202        | 180  | 0.4120        | -    | -         |
| dl_db25   | 0          | 85.2       | 179  | 0.4203        | 176  | 0.4109        | -    | -         |
| d9_ay47   | 0          | 82.5       | 180  | 0.4208        | 173  | 0.4101        | -    | -         |
| dl_av112  | 0          | 102.6      | 181  | 0.4214        | 185  | 0.4149        | -    | -         |
| d9_ah65   | 0          | 77.3       | 182  | 0.4216        | 184  | 0.4143        | 17   | 0.5115    |
| dl_cb97   | 0          | 93.6       | 183  | 0.4218        | 187  | 0.4153        | -    | -         |
| d9_af72   | 1          | 69.4       | 184  | 0.4223        | 175  | 0.4108        | -    | -         |
| dl_av21   | 0          | 99.9       | 185  | 0.4235        | 186  | 0.4152        | -    | -         |
| d10_af16  | 1          | 97.9       | 186  | 0.4238        | 188  | 0.4157        | -    | -         |
| d9_cc39   | 0          | 72.1       | 187  | 0.4239        | 196  | 0.4199        | -    | -         |
| d9_db39   | 0          | 78.1       | 188  | 0.4240        | 174  | 0.4102        | -    | -         |
| dl_av122  | 0          | 98.6       | 189  | 0.4242        | 194  | 0.4184        | 26   | 0.5869    |
| d9_bh85   | 1          | 75.5       | 190  | 0.4248        | 192  | 0.4183        | -    | -         |
| d9_cd49   | 0          | 82         | 191  | 0.4253        | 183  | 0.4140        | -    | -         |
| d9_ay56   | 0          | 76.4       | 192  | 0.4260        | 190  | 0.4172        | -    | -         |
| d9_af100  | 0          | 81.4       | 193  | 0.4261        | 189  | 0.4158        | -    | -         |
| d9_ay93   | 0          | 76.9       | 194  | 0.4261        | 193  | 0.4183        | -    | -         |
| dl_af97   | 1          | 94.5       | 195  | 0.4264        | 203  | 0.4221        | -    | -         |
| d10_ba64  | 0          | 96.7       | 196  | 0.4268        | 191  | 0.4174        | -    | -         |
| d9_ay104  | 0          | 75         | 197  | 0.4270        | 202  | 0.4220        | -    | -         |
| d10_ay5   | 0          | 97.4       | 198  | 0.4276        | 195  | 0.4191        | -    | -         |
| d8_cc9    | 0          | 29.8       | 199  | 0.4281        | 204  | 0.4222        | -    | -         |
| d9_ah15   | 0          | 79.5       | 200  | 0.4282        | 199  | 0.4207        | -    | -         |
| dl_cc102  | 0          | 103        | 201  | 0.4288        | 211  | 0.4272        | -    | -         |
| d9_ah95   | 0          | 63         | 202  | 0.4294        | 206  | 0.4238        | -    | -         |
| dl_bf56   | 1          | 91.5       | 203  | 0.4297        | 201  | 0.4220        | -    | -         |
| dl_ba95   | 0          | 100        | 204  | 0.4301        | 197  | 0.4201        | -    | -         |
| d9_bc65   | 0          | 78.9       | 205  | 0.4310        | 198  | 0.4207        | -    | -         |
| dl_av135  | 0          | 103.2      | 206  | 0.4315        | 200  | 0.4218        | -    | -         |
| dl_aq50   | 0          | 95.8       | 207  | 0.4322        | 205  | 0.4227        | -    | -         |
| d9_ay90   | 0          | 79.2       | 208  | 0.4329        | 207  | 0.4239        | -    | -         |
| dl_ah102  | 0          | 79.6       | 209  | 0.4336        | 209  | 0.4263        | -    | -         |
| d10_bd3   | 1          | 99.9       | 210  | 0.4347        | 214  | 0.4296        | -    | -         |
| DMANTL14  | -          | -          | 211  | 0.4352        | 208  | 0.4252        | -    | -         |
| dl_bb47   | 1          | 88.4       | 212  | 0.4368        | 210  | 0.4270        | -    | -         |
| dl_as105  | 0          | 96.5       | 213  | 0.4369        | 220  | 0.4332        | -    | -         |
| d9_au97   | 0          | 77.8       | 214  | 0.4373        | 212  | 0.4273        | -    | -         |
| d10_ap52  | 0          | 99.4       | 215  | 0.4389        | 216  | 0.4297        | -    | -         |
| d9_af69   | 0          | 73.1       | 216  | 0.4394        | 215  | 0.4297        | -    | -         |
| d9_az35   | 0          | 80.4       | 217  | 0.4408        | 225  | 0.4352        | -    | -         |

continued...

| structure | duplicates | $\Delta H$ | rank | VC-xPWDF (3h) | rank | VC-xPWDF (2m) | rank | autoFIDEL |
|-----------|------------|------------|------|---------------|------|---------------|------|-----------|
| d10_cb38  | 0          | 96         | 218  | 0.4409        | 222  | 0.4342        | -    | -         |
| d10_ba35  | 0          | 103.1      | 219  | 0.4412        | 217  | 0.4309        | -    | -         |
| d9_cc58   | 0          | 71.1       | 220  | 0.4423        | 230  | 0.4384        | -    | -         |
| dl_az34   | 3          | 100.4      | 221  | 0.4424        | 213  | 0.4295        | -    | -         |
| d10_au55  | 0          | 93.4       | 222  | 0.4432        | 219  | 0.4320        | -    | -         |
| d10_aq43  | 0          | 98.2       | 223  | 0.4434        | 221  | 0.4337        | -    | -         |
| dl_bf28   | 0          | 98.6       | 224  | 0.4448        | 227  | 0.4359        | 7    | 0.3942    |
| d9_ah101  | 0          | 74.3       | 225  | 0.4452        | 226  | 0.4357        | -    | -         |
| d9_au22   | 0          | 74.2       | 226  | 0.4461        | 218  | 0.4320        | -    | -         |
| d10_ay61  | 0          | 99.6       | 227  | 0.4465        | 224  | 0.4351        | -    | -         |
| dl_ap21   | 1          | 104.8      | 228  | 0.4475        | 223  | 0.4346        | 4    | 0.3510    |
| d8_ah79   | 0          | 29.1       | 229  | 0.4480        | 233  | 0.4393        | -    | -         |
| d10_aq66  | 0          | 97.7       | 230  | 0.4482        | 239  | 0.4419        | -    | -         |
| dl_ay77   | 1          | 100.6      | 231  | 0.4483        | 234  | 0.4407        | -    | -         |
| dl_bc36   | 0          | 97.2       | 232  | 0.4488        | 232  | 0.4388        | -    | -         |
| dl_az83   | 0          | 97.6       | 233  | 0.4495        | 242  | 0.4436        | -    | -         |
| d9_aq101  | 0          | 72.3       | 234  | 0.4498        | 235  | 0.4412        | -    | -         |
| dl_ah82   | 0          | 101.7      | 235  | 0.4498        | 231  | 0.4387        | -    | -         |
| dl_ah45   | 0          | 96.1       | 236  | 0.4499        | 228  | 0.4382        | -    | -         |
| dl_au9    | 0          | 88.5       | 237  | 0.4500        | 229  | 0.4383        | -    | -         |
| d9_ah37   | 0          | 70.1       | 238  | 0.4502        | 238  | 0.4417        | -    | -         |
| dl_ap65   | 0          | 93.8       | 239  | 0.4510        | 236  | 0.4413        | -    | -         |
| dl_ah9    | 1          | 98.3       | 240  | 0.4512        | 245  | 0.4443        | -    | -         |
| d10_bd58  | 0          | 88.5       | 241  | 0.4529        | 240  | 0.4421        | -    | -         |
| dl_av97   | 0          | 94         | 242  | 0.4532        | 241  | 0.4428        | 16   | 0.5011    |
| d10_ay109 | 0          | 103.2      | 243  | 0.4535        | 248  | 0.4495        | -    | -         |
| dl_bd77   | 0          | 82.7       | 244  | 0.4546        | 243  | 0.4438        | -    | -         |
| d9_bf5    | 0          | 75.2       | 245  | 0.4551        | 237  | 0.4414        | -    | -         |
| dl_bh84   | 0          | 97.8       | 246  | 0.4552        | 251  | 0.4502        | -    | -         |
| dl_ay110  | 0          | 95.1       | 247  | 0.4562        | 259  | 0.4526        | -    | -         |
| dl_ay75   | 0          | 95.5       | 248  | 0.4562        | 244  | 0.4442        | -    | -         |
| dl_ay40   | 0          | 102.9      | 249  | 0.4574        | 253  | 0.4506        | -    | -         |
| d10_bh56  | 1          | 99.8       | 250  | 0.4578        | 249  | 0.4496        | -    | -         |
| d10_ah72  | 0          | 101.2      | 251  | 0.4578        | 252  | 0.4503        | -    | -         |
| d9_bc16   | 0          | 81.2       | 252  | 0.4581        | 247  | 0.4488        | -    | -         |
| dl_av105  | 0          | 101.6      | 253  | 0.4590        | 257  | 0.4523        | -    | -         |
| d9_ba88   | 0          | 72.2       | 254  | 0.4590        | 250  | 0.4498        | -    | -         |
| d9_cd139  | 0          | 73.4       | 255  | 0.4599        | 264  | 0.4569        | -    | -         |
| dl_aq85   | 0          | 92.8       | 256  | 0.4608        | 255  | 0.4517        | -    | -         |
| d9_as124  | 0          | 81.1       | 257  | 0.4620        | 254  | 0.4510        | -    | -         |
| d10_ah63  | 0          | 103.3      | 258  | 0.4628        | 246  | 0.4485        | -    | -         |
| dl_bc52   | 0          | 104        | 259  | 0.4632        | 258  | 0.4524        | -    | -         |
| dl_au75   | 0          | 100.5      | 260  | 0.4643        | 262  | 0.4568        | -    | -         |
| dl_ay79   | 0          | 98.6       | 261  | 0.4644        | 256  | 0.4523        | -    | -         |

continued...



| structure | duplicates | $\Delta H$ | rank | VC-xPWDF (3h) | rank | VC-xPWDF (2m) | rank | autoFIDEL |
|-----------|------------|------------|------|---------------|------|---------------|------|-----------|
| d8_ae54   | 0          | 24.9       | 262  | 0.4650        | 260  | 0.4544        | 15   | 0.4863    |
| dl_ah68   | 0          | 97.8       | 263  | 0.4651        | 265  | 0.4581        | -    | -         |
| d9_ap116  | 0          | 78.2       | 264  | 0.4651        | 267  | 0.4593        | -    | -         |
| d9_af97   | 0          | 77.2       | 265  | 0.4652        | 263  | 0.4569        | -    | -         |
| d9_ah109  | 0          | 80.7       | 266  | 0.4679        | 261  | 0.4556        | -    | -         |
| d9_as35   | 0          | 77.6       | 267  | 0.4680        | 268  | 0.4593        | -    | -         |
| d9_az89   | 0          | 74.5       | 268  | 0.4710        | 266  | 0.4583        | -    | -         |
| dl_az27   | 0          | 96.2       | 269  | 0.4711        | 273  | 0.4651        | -    | -         |
| d10_ap7   | 0          | 96.9       | 270  | 0.4729        | 270  | 0.4630        | -    | -         |
| d9_av82   | 0          | 79.5       | 271  | 0.4735        | 272  | 0.4643        | -    | -         |
| d8_ah86   | 0          | 26.3       | 272  | 0.4744        | 274  | 0.4652        | -    | -         |
| d9_aq67   | 0          | 76.8       | 273  | 0.4756        | 271  | 0.4637        | -    | -         |
| dl_ay46   | 0          | 102.5      | 274  | 0.4758        | 276  | 0.4654        | -    | -         |
| d9_ay81   | 1          | 55.7       | 275  | 0.4761        | 277  | 0.4655        | -    | -         |
| d10_aq76  | 0          | 85.1       | 276  | 0.4762        | 278  | 0.4658        | -    | -         |
| dl_ay30   | 0          | 100.9      | 277  | 0.4763        | 282  | 0.4677        | -    | -         |
| d9_ap102  | 0          | 79.4       | 278  | 0.4766        | 275  | 0.4654        | -    | -         |
| d10_bh7   | 0          | 89.8       | 279  | 0.4771        | 280  | 0.4665        | -    | -         |
| dl_ae33   | 0          | 99.6       | 280  | 0.4780        | 269  | 0.4623        | -    | -         |
| d10_au81  | 1          | 102.2      | 281  | 0.4782        | 287  | 0.4704        | -    | -         |
| d9_cb98   | 0          | 78.9       | 282  | 0.4786        | 285  | 0.4697        | -    | -         |
| d9_ae86   | 0          | 79.5       | 283  | 0.4787        | 289  | 0.4714        | -    | -         |
| d8_af56   | 0          | 27.8       | 284  | 0.4793        | 284  | 0.4689        | -    | -         |
| dl_cb25   | 0          | 102.8      | 285  | 0.4795        | 290  | 0.4722        | -    | -         |
| d9_bh4    | 0          | 82         | 286  | 0.4796        | 291  | 0.4727        | -    | -         |
| dl_az76   | 0          | 80.6       | 287  | 0.4802        | 286  | 0.4697        | -    | -         |
| d9_ap34   | 0          | 73         | 288  | 0.4812        | 283  | 0.4686        | -    | -         |
| dl_cb11   | 0          | 100.2      | 289  | 0.4816        | 292  | 0.4728        | -    | -         |
| dl_cc74   | 0          | 96.6       | 290  | 0.4822        | 279  | 0.4662        | -    | -         |
| d9_aa88   | 1          | 80         | 291  | 0.4822        | 293  | 0.4738        | -    | -         |
| d9_az37   | 0          | 74.5       | 292  | 0.4823        | 294  | 0.4741        | -    | -         |
| d10_cc23  | 0          | 101.2      | 293  | 0.4828        | 281  | 0.4676        | 13   | 0.4485    |
| d9_cc69   | 0          | 81.3       | 294  | 0.4830        | 297  | 0.4760        | -    | -         |
| d9_au90   | 0          | 78.1       | 295  | 0.4834        | 295  | 0.4742        | -    | -         |
| d9_au15   | 0          | 75.5       | 296  | 0.4854        | 296  | 0.4744        | -    | -         |
| dl_cb96   | 0          | 104.8      | 297  | 0.4861        | 288  | 0.4713        | -    | -         |
| dl_bd50   | 0          | 98         | 298  | 0.4870        | 301  | 0.4796        | -    | -         |
| d9_db13   | 1          | 80.4       | 299  | 0.4872        | 299  | 0.4785        | -    | -         |
| d9_bf59   | 0          | 81.8       | 300  | 0.4875        | 303  | 0.4807        | -    | -         |
| dl_bb20   | 0          | 97         | 301  | 0.4875        | 300  | 0.4790        | -    | -         |
| d10_bf47  | 0          | 100.1      | 302  | 0.4882        | 304  | 0.4811        | -    | -         |
| dl_au14   | 0          | 87.3       | 303  | 0.4889        | 298  | 0.4767        | -    | -         |
| dl_ay112  | 0          | 101.5      | 304  | 0.4896        | 305  | 0.4826        | -    | -         |
| d9_aq85   | 0          | 79.5       | 305  | 0.4930        | 307  | 0.4828        | -    | -         |

continued...

| structure | duplicates | $\Delta H$ | rank | VC-xPWDF (3h) | rank | VC-xPWDF (2m) | rank | autoFIDEL |
|-----------|------------|------------|------|---------------|------|---------------|------|-----------|
| d9_db57   | 0          | 76.7       | 306  | 0.4941        | 306  | 0.4826        | -    | -         |
| dl_bb59   | 0          | 105        | 307  | 0.4942        | 313  | 0.4884        | -    | -         |
| d9_az95   | 0          | 71.7       | 308  | 0.4945        | 315  | 0.4895        | 2    | 0.2865    |
| d10_ap24  | 1          | 98.5       | 309  | 0.4945        | 302  | 0.4805        | -    | -         |
| dl_ah60   | 0          | 96.9       | 310  | 0.4954        | 314  | 0.4890        | -    | -         |
| d9_cc6    | 0          | 78         | 311  | 0.4964        | 318  | 0.4910        | -    | -         |
| dl_ap119  | 1          | 96.8       | 312  | 0.4965        | 309  | 0.4841        | -    | -         |
| dl_ce77   | 0          | 101.7      | 313  | 0.4968        | 310  | 0.4845        | -    | -         |
| d10_au106 | 1          | 89.7       | 314  | 0.4973        | 311  | 0.4849        | -    | -         |
| d10_cd107 | 1          | 95.8       | 315  | 0.4979        | 312  | 0.4876        | -    | -         |
| d9_av72   | 0          | 80.8       | 316  | 0.4986        | 317  | 0.4906        | -    | -         |
| d10_cb125 | 0          | 101.3      | 317  | 0.4990        | 308  | 0.4835        | -    | -         |
| d9_ay46   | 0          | 73.5       | 318  | 0.5006        | 319  | 0.4910        | -    | -         |
| d9_av99   | 0          | 69.1       | 319  | 0.5014        | 316  | 0.4896        | -    | -         |
| dl_bf69   | 0          | 95.4       | 320  | 0.5017        | 326  | 0.4946        | -    | -         |
| d9_ay103  | 0          | 80.2       | 321  | 0.5029        | 333  | 0.4978        | -    | -         |
| d10_cc63  | 0          | 98.1       | 322  | 0.5039        | 325  | 0.4946        | -    | -         |
| d9_az108  | 1          | 65.1       | 323  | 0.5040        | 320  | 0.4934        | -    | -         |
| d9_bh58   | 0          | 78.9       | 324  | 0.5041        | 321  | 0.4935        | -    | -         |
| dl_ay55   | 0          | 93.5       | 325  | 0.5047        | 328  | 0.4960        | -    | -         |
| dl_ae63   | 0          | 92.9       | 326  | 0.5056        | 327  | 0.4951        | -    | -         |
| d10_cb83  | 0          | 93.7       | 327  | 0.5056        | 322  | 0.4935        | -    | -         |
| d9_bf45   | 0          | 71.1       | 328  | 0.5056        | 323  | 0.4937        | -    | -         |
| d10_bb28  | 0          | 99.5       | 329  | 0.5062        | 337  | 0.4999        | -    | -         |
| d9_aq35   | 0          | 71.4       | 330  | 0.5064        | 324  | 0.4944        | -    | -         |
| d10_ay21  | 0          | 96.1       | 331  | 0.5064        | 331  | 0.4968        | -    | -         |
| dl_av69   | 0          | 104.1      | 332  | 0.5064        | 330  | 0.4964        | -    | -         |
| d9_cb122  | 0          | 77.1       | 333  | 0.5064        | 329  | 0.4964        | 20   | 0.5477    |
| dl_cb121  | 0          | 103.8      | 334  | 0.5071        | 334  | 0.4995        | -    | -         |
| d10_au92  | 2          | 73.3       | 335  | 0.5073        | 332  | 0.4970        | -    | -         |
| d9_au77   | 0          | 82.3       | 336  | 0.5077        | 335  | 0.4997        | -    | -         |
| dl_ba90   | 0          | 97         | 337  | 0.5080        | 339  | 0.5017        | -    | -         |
| d10_ay107 | 0          | 99         | 338  | 0.5092        | 338  | 0.5005        | -    | -         |
| d9_cd142  | 0          | 77.4       | 339  | 0.5119        | 344  | 0.5039        | -    | -         |
| d9_cb81   | 0          | 55.7       | 340  | 0.5121        | 341  | 0.5024        | -    | -         |
| d10_bh86  | 0          | 97.5       | 341  | 0.5129        | 345  | 0.5047        | -    | -         |
| d10_ae57  | 0          | 93.7       | 342  | 0.5141        | 343  | 0.5029        | -    | -         |
| d9_ay65   | 0          | 82.6       | 343  | 0.5150        | 351  | 0.5076        | -    | -         |
| dl_ay121  | 0          | 91.8       | 344  | 0.5150        | 346  | 0.5051        | -    | -         |
| d10_af69  | 0          | 101.6      | 345  | 0.5153        | 336  | 0.4999        | -    | -         |
| d9_aq15   | 0          | 67.9       | 346  | 0.5153        | 340  | 0.5020        | 24   | 0.5760    |
| d9_cc79   | 0          | 81.8       | 347  | 0.5163        | 353  | 0.5080        | -    | -         |
| d10_ae32  | 0          | 95.5       | 348  | 0.5164        | 356  | 0.5095        | -    | -         |
| d9_ay69   | 0          | 80.9       | 349  | 0.5165        | 349  | 0.5063        | -    | -         |

continued...

| structure | duplicates | $\Delta H$ | rank | VC-xPWDF (3h) | rank | VC-xPWDF (2m) | rank | autoFIDEL |
|-----------|------------|------------|------|---------------|------|---------------|------|-----------|
| dl_bc84   | 0          | 100.6      | 350  | 0.5173        | 348  | 0.5054        | -    | -         |
| d9_cc49   | 0          | 78.9       | 351  | 0.5174        | 354  | 0.5087        | -    | -         |
| dl_au49   | 0          | 98.3       | 352  | 0.5176        | 359  | 0.5107        | -    | -         |
| dl_cb82   | 0          | 93.7       | 353  | 0.5178        | 347  | 0.5054        | -    | -         |
| dl_bh78   | 0          | 92.5       | 354  | 0.5180        | 355  | 0.5095        | -    | -         |
| d10_af89  | 0          | 101.4      | 355  | 0.5183        | 342  | 0.5029        | -    | -         |
| d9_ah66   | 0          | 79.5       | 356  | 0.5187        | 350  | 0.5072        | -    | -         |
| dl_au108  | 1          | 87.5       | 357  | 0.5198        | 352  | 0.5077        | -    | -         |
| d9_ap113  | 0          | 77.4       | 358  | 0.5199        | 361  | 0.5114        | -    | -         |
| d9_aq57   | 0          | 79.2       | 359  | 0.5210        | 362  | 0.5118        | -    | -         |
| d9_cc7    | 0          | 64.9       | 360  | 0.5232        | 366  | 0.5167        | -    | -         |
| d9_av43   | 0          | 77         | 361  | 0.5236        | 357  | 0.5103        | -    | -         |
| d9_ah127  | 1          | 77.5       | 362  | 0.5242        | 360  | 0.5114        | -    | -         |
| dl_bh4    | 0          | 92.7       | 363  | 0.5244        | 365  | 0.5160        | -    | -         |
| dl_af80   | 0          | 103.7      | 364  | 0.5260        | 358  | 0.5106        | -    | -         |
| d9_av39   | 0          | 76         | 365  | 0.5263        | 370  | 0.5216        | -    | -         |
| d10_cd56  | 0          | 88.6       | 366  | 0.5270        | 363  | 0.5139        | -    | -         |
| d9_bh42   | 0          | 77.9       | 367  | 0.5283        | 364  | 0.5141        | -    | -         |
| dl_bh32   | 0          | 99.6       | 368  | 0.5289        | 368  | 0.5197        | -    | -         |
| d9_ay49   | 0          | 80.5       | 369  | 0.5308        | 371  | 0.5225        | -    | -         |
| d9_db20   | 0          | 78.5       | 370  | 0.5314        | 369  | 0.5213        | -    | -         |
| d9_cb97   | 0          | 73.5       | 371  | 0.5320        | 367  | 0.5195        | 21   | 0.5591    |
| d9_ba50   | 0          | 76.7       | 372  | 0.5344        | 372  | 0.5227        | -    | -         |
| dl_ay68   | 0          | 103.5      | 373  | 0.5348        | 376  | 0.5258        | -    | -         |
| d9_ah117  | 0          | 78.5       | 374  | 0.5354        | 374  | 0.5252        | -    | -         |
| dl_aq118  | 0          | 96.6       | 375  | 0.5360        | 373  | 0.5235        | -    | -         |
| d9_av44   | 0          | 74         | 376  | 0.5370        | 377  | 0.5262        | 29   | 0.6171    |
| dl_az81   | 0          | 99.6       | 377  | 0.5372        | 381  | 0.5303        | -    | -         |
| d9_bh86   | 0          | 82.7       | 378  | 0.5372        | 380  | 0.5287        | -    | -         |
| dl_ce72   | 0          | 100.7      | 379  | 0.5375        | 375  | 0.5257        | -    | -         |
| d9_aq54   | 0          | 78.3       | 380  | 0.5401        | 379  | 0.5275        | -    | -         |
| d10_ah46  | 0          | 100.1      | 381  | 0.5407        | 378  | 0.5273        | -    | -         |
| d9_cc70   | 1          | 74.6       | 382  | 0.5416        | 382  | 0.5303        | -    | -         |
| d9_as16   | 0          | 72.8       | 383  | 0.5416        | 383  | 0.5312        | -    | -         |
| d9_bb95   | 0          | 82         | 384  | 0.5420        | 384  | 0.5341        | -    | -         |
| d10_as94  | 0          | 90.8       | 385  | 0.5438        | 386  | 0.5359        | -    | -         |
| dl_cd62   | 0          | 101.6      | 386  | 0.5502        | 385  | 0.5354        | -    | -         |
| d9_cb70   | 0          | 61.8       | 387  | 0.5504        | 387  | 0.5371        | -    | -         |
| d10_bf87  | 0          | 90.7       | 388  | 0.5504        | 396  | 0.5455        | -    | -         |
| d9_cb128  | 0          | 79.2       | 389  | 0.5508        | 394  | 0.5451        | -    | -         |
| dl_as115  | 0          | 87         | 390  | 0.5530        | 395  | 0.5451        | -    | -         |
| d9_ce58   | 0          | 71.4       | 391  | 0.5530        | 388  | 0.5411        | -    | -         |
| d10_ay108 | 1          | 80.5       | 392  | 0.5542        | 391  | 0.5434        | -    | -         |
| dl_bf98   | 0          | 103.2      | 393  | 0.5543        | 398  | 0.5457        | -    | -         |

continued...

| structure | duplicates | $\Delta H$ | rank | VC-xPWDF (3h) | rank | VC-xPWDF (2m) | rank | autoFIDEL |
|-----------|------------|------------|------|---------------|------|---------------|------|-----------|
| dl_ay49   | 0          | 99.2       | 394  | 0.5553        | 399  | 0.5486        | -    | -         |
| dl_ah99   | 0          | 103.9      | 395  | 0.5562        | 389  | 0.5413        | 23   | 0.5668    |
| d10_cb150 | 0          | 96.8       | 396  | 0.5580        | 392  | 0.5449        | -    | -         |
| d9_cb111  | 0          | 77.2       | 397  | 0.5581        | 397  | 0.5456        | -    | -         |
| d9_aq98   | 0          | 81.7       | 398  | 0.5583        | 390  | 0.5431        | -    | -         |
| d9_cb95   | 0          | 80.3       | 399  | 0.5594        | 393  | 0.5449        | -    | -         |
| d10_ay96  | 0          | 99.2       | 400  | 0.5637        | 403  | 0.5568        | -    | -         |
| d9_as82   | 1          | 71.6       | 401  | 0.5638        | 400  | 0.5500        | -    | -         |
| d9_ay35   | 0          | 71         | 402  | 0.5646        | 401  | 0.5555        | -    | -         |
| d9_ay40   | 0          | 76.6       | 403  | 0.5648        | 402  | 0.5564        | -    | -         |
| d9_cd17   | 0          | 72.3       | 404  | 0.5699        | 404  | 0.5573        | -    | -         |
| d10_cc41  | 0          | 93.9       | 405  | 0.5709        | 414  | 0.5685        | -    | -         |
| d9_ce56   | 0          | 72.8       | 406  | 0.5720        | 413  | 0.5664        | -    | -         |
| dl_cc36   | 0          | 90.9       | 407  | 0.5733        | 415  | 0.5707        | -    | -         |
| d9_bc72   | 0          | 74.6       | 408  | 0.5735        | 406  | 0.5620        | -    | -         |
| dl_bh8    | 0          | 102.3      | 409  | 0.5736        | 412  | 0.5659        | -    | -         |
| d9_cc54   | 0          | 80.5       | 410  | 0.5745        | 411  | 0.5658        | -    | -         |
| dl_aq44   | 0          | 102.7      | 411  | 0.5745        | 409  | 0.5650        | -    | -         |
| dl_bf37   | 0          | 103.5      | 412  | 0.5755        | 405  | 0.5608        | -    | -         |
| d9_af42   | 0          | 73.8       | 413  | 0.5758        | 407  | 0.5630        | -    | -         |
| d9_au101  | 0          | 81.8       | 414  | 0.5770        | 408  | 0.5648        | -    | -         |
| dl_cc49   | 0          | 97.4       | 415  | 0.5774        | 419  | 0.5739        | -    | -         |
| d10_cd89  | 0          | 101.5      | 416  | 0.5787        | 410  | 0.5652        | -    | -         |
| d9_ce51   | 0          | 80.7       | 417  | 0.5811        | 418  | 0.5733        | -    | -         |
| d10_az65  | 0          | 86.5       | 418  | 0.5814        | 416  | 0.5714        | -    | -         |
| dl_cc47   | 0          | 103.4      | 419  | 0.5843        | 417  | 0.5726        | -    | -         |
| d9_cd92   | 1          | 80.7       | 420  | 0.5860        | 426  | 0.5806        | -    | -         |
| d10_cc114 | 0          | 102.9      | 421  | 0.5861        | 420  | 0.5748        | -    | -         |
| d10_bh50  | 0          | 96         | 422  | 0.5867        | 423  | 0.5789        | -    | -         |
| d9_cc84   | 0          | 81.8       | 423  | 0.5887        | 422  | 0.5788        | 25   | 0.5829    |
| dl_bh64   | 0          | 92.8       | 424  | 0.5895        | 428  | 0.5817        | -    | -         |
| d9_ap23   | 0          | 75.3       | 425  | 0.5904        | 425  | 0.5797        | -    | -         |
| dl_cc37   | 0          | 104.8      | 426  | 0.5910        | 421  | 0.5769        | -    | -         |
| dl_ay5    | 0          | 100.9      | 427  | 0.5924        | 432  | 0.5828        | -    | -         |
| dl_cc39   | 0          | 99.6       | 428  | 0.5929        | 430  | 0.5826        | -    | -         |
| d10_ay22  | 0          | 96.8       | 429  | 0.5930        | 429  | 0.5819        | -    | -         |
| d10_cc50  | 0          | 91.1       | 430  | 0.5933        | 434  | 0.5853        | -    | -         |
| d9_ay119  | 0          | 76.8       | 431  | 0.5935        | 431  | 0.5826        | -    | -         |
| dl_cd132  | 0          | 104.7      | 432  | 0.5939        | 424  | 0.5793        | -    | -         |
| d9_ap107  | 0          | 66.5       | 433  | 0.5948        | 433  | 0.5836        | -    | -         |
| dl_az90   | 0          | 83.3       | 434  | 0.5958        | 435  | 0.5860        | -    | -         |
| d9_cb127  | 0          | 78.4       | 435  | 0.5965        | 427  | 0.5813        | -    | -         |
| d9_ce34   | 0          | 69.6       | 436  | 0.5982        | 436  | 0.5895        | -    | -         |
| d8_cc105  | 0          | 27.1       | 437  | 0.5988        | 440  | 0.5917        | -    | -         |

continued...

| structure | duplicates | $\Delta H$ | rank | VC-xPWDF (3h) | rank | VC-xPWDF (2m) | rank | autoFIDEL |
|-----------|------------|------------|------|---------------|------|---------------|------|-----------|
| d9_ce112  | 0          | 79.7       | 438  | 0.5992        | 442  | 0.5922        | -    | -         |
| d9_cd27   | 0          | 76.2       | 439  | 0.5999        | 438  | 0.5903        | -    | -         |
| d9_cc86   | 0          | 75.6       | 440  | 0.5999        | 445  | 0.5930        | -    | -         |
| d10_av96  | 1          | 95.8       | 441  | 0.6006        | 437  | 0.5897        | -    | -         |
| dl_cc69   | 0          | 85.9       | 442  | 0.6016        | 446  | 0.5930        | -    | -         |
| d10_cc69  | 0          | 101.9      | 443  | 0.6019        | 444  | 0.5924        | -    | -         |
| d9_av53   | 0          | 82.3       | 444  | 0.6034        | 443  | 0.5922        | -    | -         |
| d9_aq129  | 0          | 79         | 445  | 0.6043        | 441  | 0.5922        | -    | -         |
| dl_cc86   | 0          | 93.3       | 446  | 0.6050        | 450  | 0.5967        | -    | -         |
| dl_cb35   | 0          | 92.1       | 447  | 0.6053        | 439  | 0.5916        | -    | -         |
| dl_cd54   | 0          | 101.2      | 448  | 0.6053        | 452  | 0.5983        | -    | -         |
| d9_cb11   | 0          | 75.4       | 449  | 0.6058        | 447  | 0.5955        | -    | -         |
| dl_bb51   | 0          | 99.2       | 450  | 0.6072        | 451  | 0.5982        | -    | -         |
| dl_ap128  | 1          | 100.6      | 451  | 0.6089        | 454  | 0.6012        | -    | -         |
| d10_cb108 | 0          | 96.2       | 452  | 0.6094        | 448  | 0.5959        | -    | -         |
| dl_av95   | 0          | 102.5      | 453  | 0.6105        | 449  | 0.5961        | -    | -         |
| d9_cb49   | 0          | 52.9       | 454  | 0.6110        | 453  | 0.6008        | -    | -         |
| dl_cb156  | 0          | 77.6       | 455  | 0.6148        | 455  | 0.6037        | -    | -         |
| dl_ap33   | 1          | 102.2      | 456  | 0.6154        | 457  | 0.6059        | -    | -         |
| d9_ba8    | 0          | 79.2       | 457  | 0.6174        | 456  | 0.6042        | -    | -         |
| dl_cc4    | 0          | 103.9      | 458  | 0.6202        | 458  | 0.6069        | -    | -         |
| d9_cc43   | 0          | 77.8       | 459  | 0.6215        | 459  | 0.6087        | -    | -         |
| d9_av42   | 0          | 74.4       | 460  | 0.6222        | 461  | 0.6115        | -    | -         |
| d10_cb52  | 0          | 73.4       | 461  | 0.6232        | 462  | 0.6121        | -    | -         |
| d9_aq138  | 1          | 82.2       | 462  | 0.6236        | 464  | 0.6136        | -    | -         |
| dl_cd138  | 0          | 83.4       | 463  | 0.6240        | 460  | 0.6104        | -    | -         |
| d10_cc10  | 0          | 94.9       | 464  | 0.6254        | 471  | 0.6217        | -    | -         |
| d10_cb132 | 0          | 87         | 465  | 0.6257        | 463  | 0.6124        | -    | -         |
| d10_ay98  | 0          | 93.6       | 466  | 0.6269        | 467  | 0.6183        | -    | -         |
| dl_av121  | 0          | 103.5      | 467  | 0.6274        | 465  | 0.6148        | -    | -         |
| dl_cb33   | 0          | 96.8       | 468  | 0.6282        | 466  | 0.6179        | -    | -         |
| dl_bc74   | 0          | 97.3       | 469  | 0.6289        | 468  | 0.6203        | -    | -         |
| d9_cc52   | 0          | 64.8       | 470  | 0.6300        | 475  | 0.6255        | -    | -         |
| dl_ay19   | 0          | 101.8      | 471  | 0.6314        | 469  | 0.6206        | -    | -         |
| d9_cc26   | 0          | 72         | 472  | 0.6321        | 473  | 0.6252        | -    | -         |
| dl_ay85   | 0          | 87.6       | 473  | 0.6339        | 474  | 0.6254        | -    | -         |
| d9_ce26   | 0          | 82.5       | 474  | 0.6360        | 485  | 0.6308        | -    | -         |
| dl_cc10   | 0          | 90.5       | 475  | 0.6361        | 491  | 0.6323        | -    | -         |
| dl_cd71   | 0          | 103.3      | 476  | 0.6366        | 472  | 0.6249        | -    | -         |
| dl_cc27   | 0          | 102.6      | 477  | 0.6373        | 484  | 0.6307        | -    | -         |
| dl_cb40   | 0          | 85.9       | 478  | 0.6374        | 476  | 0.6267        | -    | -         |
| d10_cd76  | 0          | 101.2      | 479  | 0.6378        | 477  | 0.6277        | -    | -         |
| d9_cd59   | 0          | 74.5       | 480  | 0.6384        | 481  | 0.6301        | -    | -         |
| dl_cc28   | 0          | 98.8       | 481  | 0.6386        | 470  | 0.6216        | -    | -         |

continued...

| structure | duplicates | $\Delta H$ | rank | VC-xPWDF (3h) | rank | VC-xPWDF (2m) | rank | autoFIDEL |
|-----------|------------|------------|------|---------------|------|---------------|------|-----------|
| dl_aq92   | 0          | 87.1       | 482  | 0.6387        | 480  | 0.6300        | -    | -         |
| dl_cc114  | 0          | 96.6       | 483  | 0.6389        | 492  | 0.6335        | -    | -         |
| dl_au90   | 0          | 100.1      | 484  | 0.6391        | 479  | 0.6297        | -    | -         |
| d8_cc27   | 0          | 27.9       | 485  | 0.6395        | 482  | 0.6304        | -    | -         |
| dl_cd113  | 0          | 91.3       | 486  | 0.6401        | 483  | 0.6304        | -    | -         |
| d10_aq105 | 0          | 90.3       | 487  | 0.6402        | 489  | 0.6318        | -    | -         |
| d9_aq104  | 0          | 76.1       | 488  | 0.6405        | 478  | 0.6285        | -    | -         |
| dl_ce14   | 0          | 100.4      | 489  | 0.6414        | 495  | 0.6343        | -    | -         |
| d10_cb23  | 0          | 82.6       | 490  | 0.6416        | 486  | 0.6311        | -    | -         |
| d9_cb89   | 0          | 79.8       | 491  | 0.6421        | 488  | 0.6318        | -    | -         |
| d10_cc20  | 1          | 92.8       | 492  | 0.6424        | 487  | 0.6312        | -    | -         |
| dl_as113  | 0          | 104.3      | 493  | 0.6443        | 494  | 0.6339        | -    | -         |
| d9_cc27   | 0          | 73.7       | 494  | 0.6447        | 493  | 0.6337        | -    | -         |
| d9_cd76   | 0          | 80.7       | 495  | 0.6451        | 501  | 0.6411        | -    | -         |
| dl_aq111  | 0          | 96.3       | 496  | 0.6452        | 497  | 0.6365        | -    | -         |
| d9_aq111  | 0          | 75.5       | 497  | 0.6456        | 490  | 0.6320        | -    | -         |
| d10_cc19  | 0          | 100.4      | 498  | 0.6466        | 499  | 0.6397        | -    | -         |
| dl_cb73   | 0          | 84.2       | 499  | 0.6498        | 496  | 0.6348        | -    | -         |
| dl_bf54   | 0          | 86         | 500  | 0.6499        | 500  | 0.6401        | -    | -         |
| d10_cb91  | 0          | 90.7       | 501  | 0.6514        | 498  | 0.6368        | -    | -         |
| d9_cc16   | 0          | 71.7       | 502  | 0.6518        | 504  | 0.6456        | -    | -         |
| dl_cc53   | 0          | 97.1       | 503  | 0.6519        | 503  | 0.6452        | -    | -         |
| d10_av61  | 0          | 93.1       | 504  | 0.6528        | 502  | 0.6426        | -    | -         |
| dl_cc21   | 0          | 93.8       | 505  | 0.6539        | 507  | 0.6476        | -    | -         |
| d9_cc106  | 0          | 78.8       | 506  | 0.6555        | 508  | 0.6478        | -    | -         |
| d10_ce94  | 0          | 95.3       | 507  | 0.6555        | 505  | 0.6460        | -    | -         |
| d9_aq143  | 0          | 65.5       | 508  | 0.6584        | 506  | 0.6465        | -    | -         |
| dl_cb84   | 0          | 100.6      | 509  | 0.6586        | 510  | 0.6503        | -    | -         |
| dl_cb21   | 0          | 100.9      | 510  | 0.6594        | 509  | 0.6492        | -    | -         |
| d9_aq38   | 0          | 82.2       | 511  | 0.6603        | 511  | 0.6504        | -    | -         |
| dl_cb119  | 0          | 103        | 512  | 0.6607        | 512  | 0.6507        | -    | -         |
| dl_cc50   | 0          | 101.7      | 513  | 0.6648        | 513  | 0.6534        | 5    | 0.3556    |
| dl_av62   | 0          | 94.1       | 514  | 0.6656        | 514  | 0.6548        | -    | -         |
| dl_ae7    | 1          | 90.1       | 515  | 0.6673        | 517  | 0.6591        | -    | -         |
| d10_bf72  | 0          | 91.8       | 516  | 0.6690        | 515  | 0.6589        | -    | -         |
| d10_aq16  | 0          | 100.6      | 517  | 0.6707        | 518  | 0.6627        | -    | -         |
| dl_db76   | 0          | 87.7       | 518  | 0.6712        | 516  | 0.6591        | -    | -         |
| dl_aq77   | 0          | 98.6       | 519  | 0.6725        | 519  | 0.6640        | -    | -         |
| dl_ce84   | 0          | 101.2      | 520  | 0.6745        | 521  | 0.6650        | -    | -         |
| dl_ce27   | 0          | 102.5      | 521  | 0.6759        | 524  | 0.6683        | -    | -         |
| d10_aq48  | 1          | 103.3      | 522  | 0.6768        | 527  | 0.6705        | -    | -         |
| d10_cc76  | 0          | 97.4       | 523  | 0.6782        | 520  | 0.6643        | -    | -         |
| d9_ap119  | 0          | 76.1       | 524  | 0.6789        | 523  | 0.6677        | -    | -         |
| d8_ce1    | 0          | 29.8       | 525  | 0.6791        | 525  | 0.6687        | -    | -         |

continued...

| structure | duplicates | $\Delta H$ | rank | VC-xPWDF (3h) | rank | VC-xPWDF (2m) | rank | autoFIDEL |
|-----------|------------|------------|------|---------------|------|---------------|------|-----------|
| dl_cc40   | 0          | 92.8       | 526  | 0.6799        | 522  | 0.6657        | -    | -         |
| dl_cd109  | 0          | 103        | 527  | 0.6806        | 529  | 0.6720        | -    | -         |
| d9_au81   | 0          | 79.7       | 528  | 0.6809        | 528  | 0.6715        | -    | -         |
| dl_cc71   | 0          | 103.7      | 529  | 0.6809        | 531  | 0.6750        | -    | -         |
| d9_ap66   | 0          | 69.2       | 530  | 0.6824        | 533  | 0.6758        | -    | -         |
| d9_cb77   | 0          | 72.9       | 531  | 0.6827        | 526  | 0.6695        | -    | -         |
| dl_cd102  | 0          | 96.5       | 532  | 0.6838        | 530  | 0.6730        | -    | -         |
| d9_cd6    | 0          | 76.2       | 533  | 0.6866        | 532  | 0.6755        | -    | -         |
| d9_cc89   | 0          | 80.2       | 534  | 0.6920        | 535  | 0.6854        | -    | -         |
| d9_as61   | 0          | 70.8       | 535  | 0.6931        | 534  | 0.6847        | -    | -         |
| d9_cc53   | 0          | 82.5       | 536  | 0.7007        | 537  | 0.6963        | -    | -         |
| d9_cc65   | 0          | 75.2       | 537  | 0.7062        | 536  | 0.6950        | -    | -         |
| dl_cd80   | 0          | 86.4       | 538  | 0.7062        | 539  | 0.6989        | -    | -         |
| d10_cb152 | 0          | 101.7      | 539  | 0.7075        | 540  | 0.6996        | -    | -         |
| d10_cb89  | 1          | 87.3       | 540  | 0.7085        | 541  | 0.7012        | -    | -         |
| d8_bc81   | 0          | 0          | 541  | 0.7100        | 538  | 0.6984        | 11   | 0.4429    |
| dl_av93   | 0          | 96.3       | 542  | 0.7147        | 542  | 0.7034        | -    | -         |
| d10_cc31  | 0          | 101.7      | 543  | 0.7183        | 545  | 0.7125        | -    | -         |
| d10_ba53  | 0          | 96.5       | 544  | 0.7193        | 543  | 0.7092        | -    | -         |
| dl_cc109  | 0          | 97.3       | 545  | 0.7212        | 546  | 0.7155        | -    | -         |
| d10_as38  | 0          | 100.5      | 546  | 0.7217        | 544  | 0.7105        | -    | -         |
| d10_cd59  | 0          | 101        | 547  | 0.7489        | 547  | 0.7398        | -    | -         |
| d9_ba49   | 0          | 79.2       | 548  | 0.7519        | 548  | 0.7420        | -    | -         |
| d9_az105  | 0          | 73.8       | 549  | 0.7687        | 549  | 0.7606        | -    | -         |
| d10_ay105 | 0          | 93.1       | 550  | 0.8927        | 550  | 0.8869        | -    | -         |

Table S13: Summary of data for progesterone. Relative enthalpy is given in kJ/mol, ranks are according to the next-right column, autoFIDEL comparisons were made with the default program parameters and the experimental powder diffractograms collected over 3 hrs.

| structure  | duplicates | $\Delta H$ | rank | VC-xPWDF (3h) | rank | VC-xPWDF (2m) | rank | autoFIDEL |
|------------|------------|------------|------|---------------|------|---------------|------|-----------|
| PROGST12   | -          | -          | 1    | 0.0416        | 1    | 0.0447        | -    | -         |
| PROGST10   | -          | -          | 2    | 0.0428        | 2    | 0.0463        | 1    | 0.0895    |
| m65_aq46   | 0          | 9.8        | 3    | 0.0490        | 3    | 0.0528        | 2    | 0.0918    |
| m65_ak98   | 0          | 13.7       | 4    | 0.1116        | 4    | 0.1128        | -    | -         |
| opt_ca33   | 0          | 7          | 5    | 0.1122        | 5    | 0.1143        | 13   | 0.3751    |
| opt_dd55   | 0          | 9.8        | 6    | 0.1174        | 6    | 0.1151        | -    | -         |
| m110_ca2   | 0          | 9.8        | 7    | 0.1183        | 8    | 0.1209        | -    | -         |
| opt_ca84   | 0          | 9.6        | 8    | 0.1184        | 7    | 0.1194        | -    | -         |
| opt_am6    | 0          | 10.8       | 9    | 0.1243        | 9    | 0.1230        | -    | -         |
| m190_ca81  | 0          | 12.6       | 10   | 0.1272        | 10   | 0.1284        | -    | -         |
| opt_ab96   | 0          | 14.2       | 11   | 0.1273        | 11   | 0.1312        | -    | -         |
| m190_ak10  | 0          | 12.7       | 12   | 0.1373        | 12   | 0.1362        | -    | -         |
| opt_av5    | 0          | 13.4       | 13   | 0.1391        | 13   | 0.1375        | -    | -         |
| opt_ab50   | 0          | 13.4       | 14   | 0.1430        | 15   | 0.1455        | -    | -         |
| m80_aq13   | 0          | 13         | 15   | 0.1436        | 14   | 0.1428        | 16   | 0.4232    |
| m80_ca6    | 0          | 11.8       | 16   | 0.1470        | 17   | 0.1473        | -    | -         |
| opt_ab97   | 0          | 8.4        | 17   | 0.1490        | 16   | 0.1464        | -    | -         |
| opt_ab36   | 0          | 7.7        | 18   | 0.1491        | 18   | 0.1508        | -    | -         |
| opt_ak50   | 0          | 13.5       | 19   | 0.1518        | 19   | 0.1517        | 11   | 0.3521    |
| opt_ab114  | 0          | 9.4        | 20   | 0.1541        | 20   | 0.1521        | -    | -         |
| m80_ab115  | 0          | 14.1       | 21   | 0.1566        | 23   | 0.1593        | -    | -         |
| m190_ca6   | 0          | 8.2        | 22   | 0.1571        | 21   | 0.1575        | -    | -         |
| opt_ca9    | 0          | 7.6        | 23   | 0.1580        | 22   | 0.1589        | -    | -         |
| m190_ab122 | 0          | 13.5       | 24   | 0.1626        | 24   | 0.1654        | -    | -         |
| m190_ab89  | 0          | 12.8       | 25   | 0.1689        | 25   | 0.1660        | 24   | 0.5042    |
| opt_ab111  | 0          | 12.1       | 26   | 0.1723        | 27   | 0.1767        | -    | -         |
| opt_ab108  | 0          | 11.2       | 27   | 0.1745        | 26   | 0.1761        | 27   | 0.6123    |
| m190_ca55  | 0          | 13.7       | 28   | 0.1775        | 29   | 0.1784        | -    | -         |
| m65_am44   | 0          | 11.6       | 29   | 0.1786        | 28   | 0.1769        | 6    | 0.2677    |
| opt_am2    | 0          | 13.9       | 30   | 0.1787        | 31   | 0.1822        | -    | -         |
| m65_ca10   | 0          | 9.2        | 31   | 0.1805        | 30   | 0.1815        | 5    | 0.2544    |
| opt_fa44   | 0          | 14.7       | 32   | 0.1850        | 32   | 0.1842        | 20   | 0.4484    |
| m190_ak12  | 0          | 9.6        | 33   | 0.1876        | 34   | 0.1897        | -    | -         |
| m65_ak70   | 0          | 10.1       | 34   | 0.1878        | 33   | 0.1879        | -    | -         |
| opt_cc95   | 0          | 14.3       | 35   | 0.1905        | 39   | 0.1940        | -    | -         |
| opt_ab94   | 0          | 9.9        | 36   | 0.1907        | 38   | 0.1938        | -    | -         |
| opt_ca123  | 0          | 13         | 37   | 0.1913        | 36   | 0.1924        | -    | -         |
| opt_de16   | 0          | 14         | 38   | 0.1929        | 40   | 0.1942        | -    | -         |
| opt_ab60   | 0          | 14.2       | 39   | 0.1935        | 37   | 0.1930        | -    | -         |
| m190_dd92  | 0          | 14.5       | 40   | 0.1941        | 35   | 0.1910        | -    | -         |
| opt_ab123  | 0          | 13.3       | 41   | 0.1997        | 41   | 0.2033        | -    | -         |

continued...



| structure | duplicates | $\Delta H$ | rank | VC-xPWDF (3h) | rank | VC-xPWDF (2m) | rank | autoFIDEL |
|-----------|------------|------------|------|---------------|------|---------------|------|-----------|
| opt_am58  | 0          | 14.9       | 42   | 0.2053        | 43   | 0.2057        | -    | -         |
| m65_am2   | 0          | 4.6        | 43   | 0.2071        | 42   | 0.2045        | -    | -         |
| m80_ca35  | 0          | 13.1       | 44   | 0.2081        | 44   | 0.2106        | -    | -         |
| opt_ca120 | 0          | 10.8       | 45   | 0.2083        | 45   | 0.2111        | -    | -         |
| m65_ai3   | 0          | 10.9       | 46   | 0.2148        | 46   | 0.2128        | 25   | 0.5861    |
| m190_ca71 | 0          | 6.4        | 47   | 0.2164        | 47   | 0.2140        | -    | -         |
| m190_am8  | 0          | 13.9       | 48   | 0.2218        | 48   | 0.2185        | -    | -         |
| opt_ca76  | 0          | 7.3        | 49   | 0.2228        | 50   | 0.2233        | -    | -         |
| opt_am4   | 0          | 13.3       | 50   | 0.2258        | 53   | 0.2254        | -    | -         |
| opt_am69  | 0          | 13         | 51   | 0.2263        | 52   | 0.2250        | -    | -         |
| m190_aq60 | 0          | 13.8       | 52   | 0.2265        | 49   | 0.2233        | 14   | 0.3788    |
| opt_dd2   | 0          | 7.9        | 53   | 0.2299        | 54   | 0.2257        | -    | -         |
| opt_ab56  | 0          | 14.5       | 54   | 0.2302        | 57   | 0.2298        | -    | -         |
| m80_ak24  | 0          | 10.6       | 55   | 0.2302        | 55   | 0.2284        | 23   | 0.4620    |
| opt_ai41  | 0          | 13.6       | 56   | 0.2317        | 51   | 0.2241        | -    | -         |
| opt_fc41  | 0          | 13.6       | 57   | 0.2322        | 56   | 0.2295        | -    | -         |
| opt_aq29  | 0          | 14.4       | 58   | 0.2346        | 58   | 0.2362        | -    | -         |
| opt_dd32  | 0          | 11.4       | 59   | 0.2417        | 59   | 0.2366        | 8    | 0.3143    |
| m65_dc11  | 0          | 9.3        | 60   | 0.2460        | 60   | 0.2444        | -    | -         |
| m80_ca97  | 0          | 14.2       | 61   | 0.2467        | 61   | 0.2516        | -    | -         |
| opt_am65  | 0          | 13.3       | 62   | 0.2525        | 62   | 0.2525        | -    | -         |
| opt_ca50  | 0          | 6.5        | 63   | 0.2542        | 63   | 0.2536        | -    | -         |
| opt_ca125 | 0          | 7          | 64   | 0.2574        | 64   | 0.2582        | -    | -         |
| m80_ab54  | 0          | 11.6       | 65   | 0.2595        | 68   | 0.2626        | -    | -         |
| opt_am5   | 0          | 10.2       | 66   | 0.2623        | 65   | 0.2589        | -    | -         |
| m190_ca61 | 0          | 13.2       | 67   | 0.2629        | 66   | 0.2604        | -    | -         |
| opt_av1   | 0          | 7          | 68   | 0.2638        | 67   | 0.2615        | -    | -         |
| opt_aq38  | 0          | 12.5       | 69   | 0.2665        | 69   | 0.2629        | -    | -         |
| opt_ai5   | 0          | 14.3       | 70   | 0.2680        | 71   | 0.2678        | -    | -         |
| opt_ca25  | 0          | 10.2       | 71   | 0.2703        | 72   | 0.2694        | -    | -         |
| m80_az3   | 0          | 11.3       | 72   | 0.2703        | 70   | 0.2661        | -    | -         |
| opt_ak14  | 0          | 13.5       | 73   | 0.2706        | 73   | 0.2705        | -    | -         |
| opt_ab78  | 0          | 11.5       | 74   | 0.2715        | 74   | 0.2749        | -    | -         |
| opt_ca95  | 0          | 8.2        | 75   | 0.2734        | 75   | 0.2751        | -    | -         |
| m65_fa73  | 0          | 11.2       | 76   | 0.2754        | 76   | 0.2755        | -    | -         |
| opt_de56  | 0          | 3          | 77   | 0.2794        | 77   | 0.2788        | -    | -         |
| opt_aq104 | 0          | 14.6       | 78   | 0.2907        | 78   | 0.2881        | -    | -         |
| opt_cb92  | 0          | 11.9       | 79   | 0.2939        | 84   | 0.2958        | -    | -         |
| opt_fa1   | 0          | 9.5        | 80   | 0.2951        | 81   | 0.2929        | -    | -         |
| m190_fc67 | 0          | 10.3       | 81   | 0.2957        | 80   | 0.2891        | -    | -         |
| m80_fa44  | 0          | 11.9       | 82   | 0.2965        | 82   | 0.2941        | 10   | 0.3432    |
| m190_de6  | 0          | 11         | 83   | 0.2971        | 79   | 0.2889        | -    | -         |
| opt_ca21  | 0          | 12.3       | 84   | 0.2975        | 86   | 0.3020        | -    | -         |
| opt_all   | 0          | 13         | 85   | 0.3015        | 85   | 0.2962        | -    | -         |

continued. . .

| structure  | duplicates | $\Delta H$ | rank | VC-xPWDF (3h) | rank | VC-xPWDF (2m) | rank | autoFIDEL |
|------------|------------|------------|------|---------------|------|---------------|------|-----------|
| m80_ai109  | 0          | 12.2       | 86   | 0.3017        | 83   | 0.2943        | 7    | 0.2993    |
| m110_fc18  | 0          | 13.9       | 87   | 0.3044        | 87   | 0.3028        | -    | -         |
| m65_ca14   | 0          | 13.7       | 88   | 0.3132        | 88   | 0.3129        | -    | -         |
| opt_ak42   | 0          | 14.9       | 89   | 0.3142        | 89   | 0.3155        | 22   | 0.4608    |
| m65_am26   | 0          | 13         | 90   | 0.3241        | 91   | 0.3227        | -    | -         |
| m80_fc44   | 0          | 14.4       | 91   | 0.3244        | 92   | 0.3242        | 17   | 0.4254    |
| opt_fc9    | 0          | 15         | 92   | 0.3245        | 90   | 0.3225        | -    | -         |
| opt_aq94   | 0          | 8.4        | 93   | 0.3272        | 93   | 0.3281        | -    | -         |
| m65_fc90   | 0          | 7.6        | 94   | 0.3295        | 94   | 0.3282        | -    | -         |
| opt_ca42   | 0          | 13.3       | 95   | 0.3389        | 95   | 0.3333        | -    | -         |
| opt_ab112  | 0          | 14.3       | 96   | 0.3390        | 96   | 0.3337        | 4    | 0.2480    |
| opt_bd1    | 0          | 12         | 97   | 0.3394        | 100  | 0.3389        | -    | -         |
| opt_al80   | 0          | 13.6       | 98   | 0.3396        | 98   | 0.3361        | -    | -         |
| opt_ab35   | 0          | 11.3       | 99   | 0.3397        | 97   | 0.3354        | -    | -         |
| opt_de93   | 0          | 13.2       | 100  | 0.3422        | 99   | 0.3378        | 15   | 0.3864    |
| PROGST13   | -          | -          | 101  | 0.3426        | 101  | 0.3434        | -    | -         |
| m190_ak5   | 0          | 14.1       | 102  | 0.3468        | 102  | 0.3459        | -    | -         |
| m80_ak4    | 0          | 14.6       | 103  | 0.3484        | 103  | 0.3480        | -    | -         |
| opt_ab104  | 0          | 12.9       | 104  | 0.3568        | 105  | 0.3529        | -    | -         |
| opt_fa87   | 0          | 9.8        | 105  | 0.3584        | 104  | 0.3519        | -    | -         |
| m65_ab49   | 0          | 11.4       | 106  | 0.3593        | 107  | 0.3602        | -    | -         |
| m110_fc11  | 0          | 12.8       | 107  | 0.3626        | 106  | 0.3579        | -    | -         |
| m190_am96  | 0          | 14.6       | 108  | 0.3771        | 108  | 0.3721        | -    | -         |
| opt_ak101  | 0          | 12.9       | 109  | 0.3816        | 109  | 0.3783        | 3    | 0.2440    |
| m65_ak49   | 0          | 12.8       | 110  | 0.3831        | 110  | 0.3802        | -    | -         |
| opt_ai42   | 0          | 13.5       | 111  | 0.3871        | 111  | 0.3848        | 18   | 0.4360    |
| opt_ak4    | 0          | 14.3       | 112  | 0.3949        | 112  | 0.3892        | -    | -         |
| m65_fc88   | 0          | 13.9       | 113  | 0.3954        | 113  | 0.3899        | 21   | 0.4494    |
| opt_fc29   | 0          | 11.9       | 114  | 0.3969        | 115  | 0.3972        | -    | -         |
| opt_ai6    | 0          | 12         | 115  | 0.3972        | 114  | 0.3936        | -    | -         |
| m190_ak1   | 0          | 12.5       | 116  | 0.3988        | 117  | 0.3994        | -    | -         |
| m80_ak23   | 0          | 14.7       | 117  | 0.3998        | 116  | 0.3991        | -    | -         |
| m80_ak121  | 0          | 14.1       | 118  | 0.4029        | 118  | 0.4010        | -    | -         |
| m65_ak42   | 0          | 10.1       | 119  | 0.4093        | 119  | 0.4090        | -    | -         |
| opt_cb47   | 0          | 10.8       | 120  | 0.4140        | 120  | 0.4094        | -    | -         |
| opt_ak9    | 0          | 12         | 121  | 0.4151        | 121  | 0.4127        | -    | -         |
| opt_fa39   | 0          | 9.5        | 122  | 0.4157        | 122  | 0.4129        | -    | -         |
| opt_ak1    | 0          | 1.5        | 123  | 0.4264        | 123  | 0.4238        | -    | -         |
| m110_fc29  | 0          | 13.7       | 124  | 0.4265        | 125  | 0.4257        | -    | -         |
| opt_ab15   | 0          | 9.5        | 125  | 0.4293        | 124  | 0.4242        | 9    | 0.3147    |
| opt_ab101  | 0          | 14         | 126  | 0.4401        | 126  | 0.4352        | -    | -         |
| m110_ak100 | 0          | 12.5       | 127  | 0.4522        | 127  | 0.4507        | -    | -         |
| m80_ak119  | 0          | 11.1       | 128  | 0.4575        | 128  | 0.4557        | -    | -         |
| opt_cc42   | 0          | 14         | 129  | 0.4584        | 129  | 0.4595        | -    | -         |

continued. . .

| structure | duplicates | $\Delta H$ | rank | VC-xPWDF (3h) | rank | VC-xPWDF (2m) | rank | autoFIDEL |
|-----------|------------|------------|------|---------------|------|---------------|------|-----------|
| opt_ak16  | 0          | 0          | 130  | 0.4650        | 131  | 0.4630        | -    | -         |
| opt_fa3   | 0          | 11.8       | 131  | 0.4656        | 130  | 0.4610        | 19   | 0.4472    |
| opt_ak113 | 0          | 5.1        | 132  | 0.4662        | 132  | 0.4638        | -    | -         |
| opt_ab79  | 0          | 13.1       | 133  | 0.4678        | 133  | 0.4650        | -    | -         |
| opt_fc3   | 0          | 12.8       | 134  | 0.4793        | 134  | 0.4716        | -    | -         |
| m80_ak13  | 0          | 12.6       | 135  | 0.4885        | 135  | 0.4865        | -    | -         |
| m110_fc47 | 0          | 14         | 136  | 0.4971        | 136  | 0.4950        | -    | -         |
| opt_fc52  | 0          | 14.3       | 137  | 0.5085        | 137  | 0.5090        | -    | -         |
| opt_ab116 | 0          | 12.3       | 138  | 0.5160        | 138  | 0.5111        | -    | -         |
| opt_fc31  | 0          | 14.7       | 139  | 0.5180        | 139  | 0.5152        | 26   | 0.5884    |
| opt_au2   | 0          | 13.5       | 140  | 0.5222        | 140  | 0.5171        | -    | -         |
| m65_ca120 | 0          | 7.8        | 141  | 0.5247        | 141  | 0.5216        | 12   | 0.3741    |
| opt_fc8   | 0          | 14.2       | 142  | 0.5343        | 142  | 0.5304        | -    | -         |
| opt_fa64  | 0          | 10.8       | 143  | 0.5412        | 143  | 0.5367        | -    | -         |
| m110_cb6  | 0          | 13.8       | 144  | 0.5461        | 144  | 0.5486        | -    | -         |
| opt_cc121 | 0          | 11.7       | 145  | 0.5465        | 145  | 0.5492        | -    | -         |
| m110_ak36 | 0          | 14.8       | 146  | 0.5804        | 147  | 0.5776        | -    | -         |
| opt_dc51  | 0          | 14.5       | 147  | 0.5821        | 146  | 0.5760        | -    | -         |
| opt_cc11  | 0          | 14.1       | 148  | 0.5891        | 148  | 0.5814        | -    | -         |
| opt_cb48  | 0          | 10.4       | 149  | 0.5951        | 149  | 0.5910        | -    | -         |
| opt_cb25  | 0          | 9.6        | 150  | 0.6031        | 150  | 0.6001        | -    | -         |
| opt_ai62  | 0          | 7.2        | 151  | 0.6545        | 151  | 0.6502        | -    | -         |
| m65_ak3   | 0          | 11         | 152  | 0.6580        | 152  | 0.6537        | -    | -         |

## References

- (1) X'pert Data Collector Software, version 5.3; PANalytical B.V.: Almelo, The Netherlands, 2014.
- (2) Lancaster, R. W.; Karamertzanis, P. G.; Hulme, A. T.; Tocher, D. A.; Covey, D. F.; Price, S. L. *Chem. Commun.* **2006**, 4921–4923.
- (3) Price, S. L.; Wibley, K. S. *J. Phys. Chem. A* **1997**, *101*, 2198–2206.
- (4) Issa, N.; Barnett, S. A.; Mohamed, S.; Braun, D. E.; Copley, R. C.; Tocher, D. A.; Price, S. L. *CrystEngComm* **2012**, *14*, 2454–2464.
- (5) Habgood, M. *Cryst. Growth Des.* **2011**, *11*, 3600–3608.
- (6) Frisch, M. J. et al., Gaussian Inc. Wallingford CT 2010.
- (7) Stone, A.; Alderton, M. *Mol. Phys.* **1985**, *56*, 1047–1064.
- (8) Holden, J. R.; Du, Z.; Ammon, H. L. *J. Comput. Chem.* **1993**, *14*, 422–437.
- (9) Karamertzanis, P.; Pantelides, C. *Mol. Phys.* **2007**, *105*, 273–291.
- (10) Williams, D. E. *J. Comput. Chem.* **2001**, *22*, 1154–1166.
- (11) Coombes, D. S.; Price, S. L.; Willock, D. J.; Leslie, M. *J. Phys. Chem.* **1996**, *100*, 7352–7360.
- (12) Willock, D. J.; Price, S. L.; Leslie, M.; Catlow, C. R. A. *J. Comput. Chem.* **1995**, *16*, 628–647.
- (13) Price, S. L.; Leslie, M.; Welch, G. W. A.; Habgood, M.; Price, L. S.; Karamertzanis, P. G.; Day, G. M. *Phys. Chem. Chem. Phys.* **2010**, *12*, 8478–8490.
- (14) Kazantsev, A.; Karamertzanis, P.; Pantelides, C. *Molecular System Engineering*, edited by CS Adjiman & A. Galindo, Vol. 6, 2010.
- (15) Mayo, R. A.; Otero-de-la-Roza, A.; Johnson, E. R. *CrystEngComm* **2022**, *24*, 8326–8338.
- (16) Otero-de-la-Roza, A.; Johnson, E. R.; Luaña, V. *Comput. Phys. Commun.* **2014**, *185*, 1007–1018.
- (17) De Gelder, R.; Wehrens, R.; Hageman, J. A. *J. Comput. Chem.* **2001**, *22*, 273–289.
- (18) Habermehl, S.; Mörschel, P.; Eisenbrandt, P.; Hammer, S. M.; Schmidt, M. U. *Acta Crystallogr.* **2014**, *B70*, 347–359.
- (19) Motherwell, S.; Chisholm, J. A. *J. Appl. Cryst.* **2005**, *38*, 228–231.
- (20) Macrae, C. F.; Sovago, I.; Cottrell, S. J.; Galek, P. T. A.; McCabe, P.; Pidcock, E.; Platings, M.; Shields, G. P.; Stevens, J. S.; Towler, M.; Wood, P. A. *J. Appl. Cryst.* **2020**, *53*, 226–235.
